# Supplementary material for: Photocatalytic difunctionalization of arylalkenes with quinoxalinones and dialkyl dithiophosphoric acids
Source: Royal Society of Chemistry journal article supplement (doi:10.1039/d4ob01337a), 2024-01-01

## Supporting Information

### Photocatalytic difunctionalization of arylalkenes with quinoxalinones and dialkyl dithiophosphoric acids

Zhen Wang\*<sup>a</sup>

wangzhen0312@outlook.com

<sup>a</sup>Department of Pharmacy, Nanyang Medical College, Nanyang 473061.

#### Table of Content

|                                                                                                                |     |
|----------------------------------------------------------------------------------------------------------------|-----|
| 1. General information .....                                                                                   | S2  |
| 2. The general procedure for the photocatalysis.....                                                           | S2  |
| 3. The general procedure for the scale-up synthesis.....                                                       | S2  |
| 4. The general procedure for the control experiment .....                                                      | S3  |
| 5. The detection of in situ generated H <sub>2</sub> O <sub>2</sub> by potassium iodide-starch test paper..... | S3  |
| 6. The unsuccessful substrates.....                                                                            | S4  |
| 7. The general procedure for the CV experiments.....                                                           | S4  |
| 8. The Stern-Volmer quenching experiments.....                                                                 | S5  |
| 9. The characterization data.....                                                                              | S6  |
| 10. The NMR spectra .....                                                                                      | S19 |

## 1. General information

Unless otherwise special noted, all reagents were purchased from commercial supplies and were used without further purification. Flash column chromatography was performed using silica gel (100-200 mesh). NMR spectra were obtained on a Bruker 400 MHz NMR using  $\text{CDCl}_3$  as the solvent. Chemical shifts are given in ppm and coupling constants ( $J$ ) in Hz. CV were performed on a CHI 600e potentiostat.

## 2. The general procedure for the photocatalysis

To a glass tube (8 mL) was added N-methyl quinoxalinone (0.2 mmol, 32 mg), styrene (0.4 mmol, 41 mg), diethyl dithiophosphoric acid (0.5 mmol, 94 mg), Eosin Y (0.002 mmol, 1.3 mg) and  $\text{CH}_3\text{CN}$  (2 mL) sequentially. The glass tube was then sealed with a rubber stopper and a  $\text{O}_2$  balloon was attached. Finally, the resulting solution was irradiated by Kessil light (456 nm, 10 W) at rt for 4 h. A fan was necessary to cool down the reaction tube. After the reaction, the solvent was evaporated and the resulting crude was purified by  $\text{SiO}_2$  (elute: petroleum ether/ethyl ether 10:1 to 4:1) to give the corresponding product **4** as a yellow oil (67 mg, 75%).

## 3. The general procedure for the scale-up synthesis

To a round-bottom flask (100 mL) was added N-methyl quinoxalinone (2 mmol, 320 mg), styrene (4 mmol, 410 mg), diethyl dithiophosphoric acid (5 mmol, 940 mg), Eosin Y (0.02 mmol, 13 mg) and  $\text{CH}_3\text{CN}$  (20 mL) sequentially. The glass tube was then sealed with a rubber stopper and a  $\text{O}_2$  balloon was attached. Finally, the resulting solution was irradiated by two Kessil lights (456 nm, 10 W) at rt for 10 h. A fan was necessary to cool down the reaction tube. After the reaction, the solvent was evaporated and the resulting crude was purified by  $\text{SiO}_2$  (elute: petroleum ether/ethyl ether 10:1 to 4:1) to give the corresponding product **4** as a yellow oil (473 mg, 53%).

#### 4. The general procedure for the control experiment

To a glass tube (8 mL) was added N-methyl quinoxalinone (0.2 mmol, 32 mg), styrene (0.4 mmol, 41 mg), diethyl dithiophosphoric acid (0.5 mmol, 94 mg), Eosin Y (0.002 mmol, 1.3 mg) and CH<sub>3</sub>CN (2 mL) sequentially. Then, BHT (0.4 mmol, 88 mg) was added to the reaction tube. The glass tube was then sealed with a rubber stopper and a O<sub>2</sub> balloon was attached. Finally, the resulting solution was irradiated by Kessil light (456 nm, 10 W) at rt for 4 h. A fan was necessary to cool down the reaction tube. After the reaction, the solvent was evaporated. The TLC analysis showed that only trace amount of product **4** was generated. However, the adduct between S-centered radical and BHT was observed by HRMS.

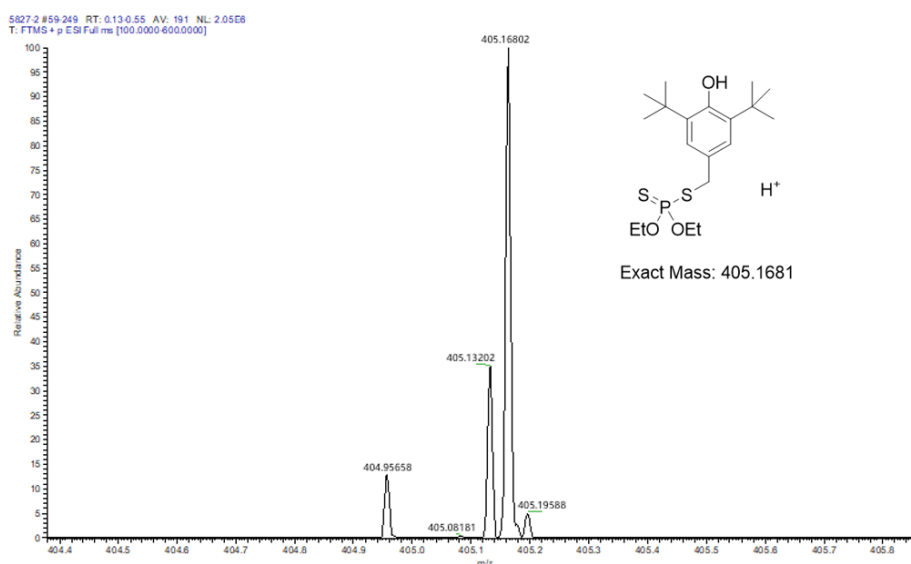

Fig S1. The HRMS of the radical adduct

#### 5. The detection of in situ generated H<sub>2</sub>O<sub>2</sub> by potassium iodide-starch test paper

To a glass tube (8 mL) was added N-methyl quinoxalinone (0.2 mmol, 32 mg), styrene (0.4 mmol, 41 mg), diethyl dithiophosphoric acid (0.5 mmol, 94 mg), Eosin Y (0.002 mmol, 1.3 mg) and CH<sub>3</sub>CN (2 mL) sequentially. The glass tube was then sealed with a rubber stopper and a O<sub>2</sub> balloon was attached. Finally, the resulting red solution was

irradiated by Kessil light (456 nm, 10 W) at rt for 4 h. A fan was necessary to cool down the reaction tube. After the reaction, potassium iodide-starch test paper was immersed into the reaction mixture. As expected, the blue color change is clearly visible.

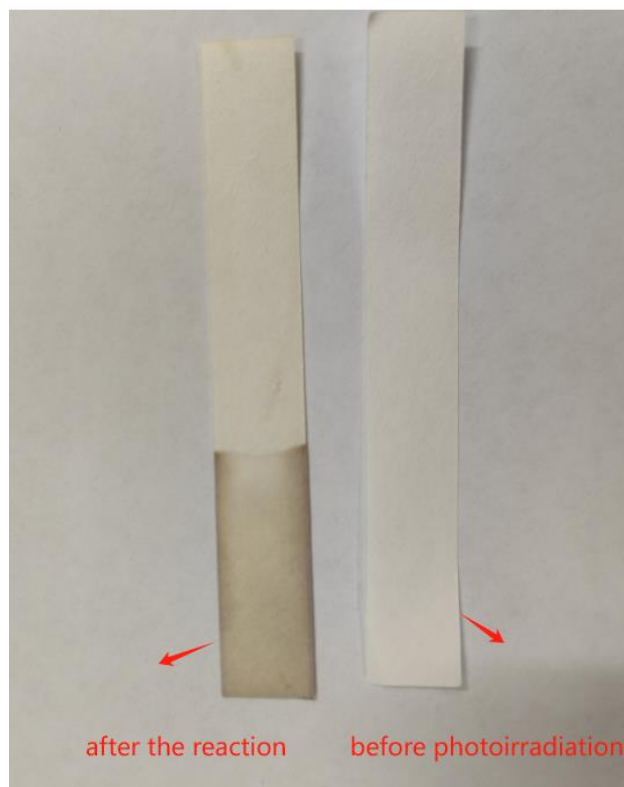

Fig S2. Potassium iodide starch paper test

## 6. The unsuccessful substrates

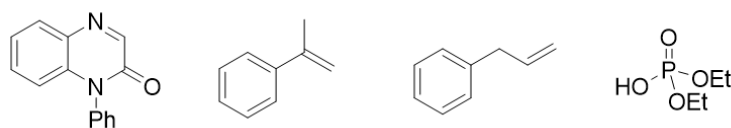

## 7. The general procedure for the CV experiments

All the CV experiments were performed in a three-electrode cell at room temperature. During CV analysis, Pt disk was employed as the working electrode; Pt wire was employed as the counter electrode; SCE was employed as the reference electrode. The

scan rate is 100 mV/s. The blank solution is 0.1 M LiClO<sub>4</sub> in CH<sub>3</sub>CN. The concentration of the substrates is 5 mM in blank solution.

## 8. The Stern-Volmer quenching experiments

The UV-Vis spectrum of the cat. (eosin Y) in CH<sub>3</sub>CN was recorded on a Shimadzu spectrophotometer. The concentration of cat. is 1\*10<sup>-6</sup> mol/L. The absorption was collected and the spectrum was shown in Fig. S3.

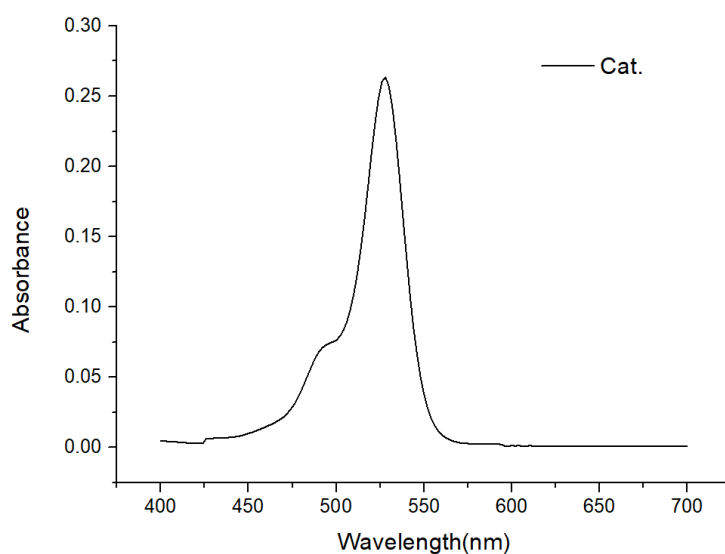

Fig. S3. UV-Vis spectrum of eosin Y (cat.)

The following luminescence quenching experiments were conducted in CH<sub>3</sub>CN. The excitation wavelength was 528 nm. The concentration of cat. is 1\*10<sup>-6</sup> mol/L. We can conclude that substrate **3a** can't quench the excited state of eosin Y (Fig. S4). This result ruled out the electro- or energy transfer process thereby supported our hypothesized HAT mechanism to generate S-centered radical from **3a**.

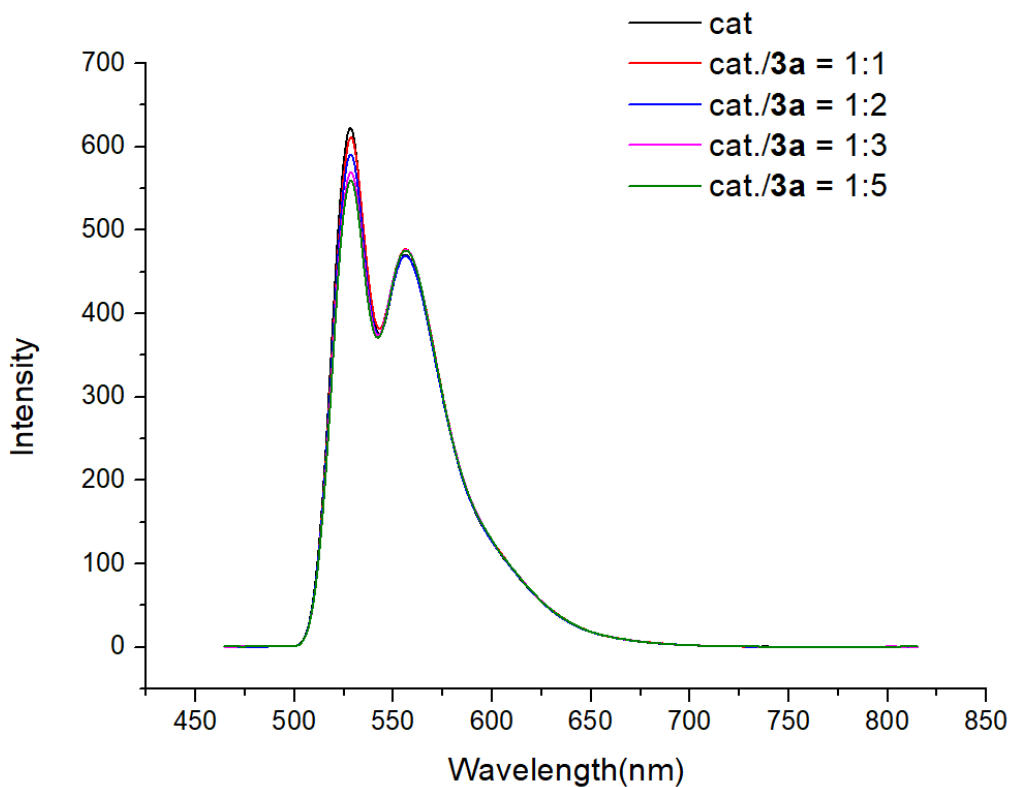

Fig. S4. The Stern-Volmer quenching experiments

## 9. The characterization data

*O,O*-diethyl *S*-(2-(4-methyl-3-oxo-3,4-dihydroquinoxalin-2-yl)-2-phenylethyl) phosphorodithioate (**4**)

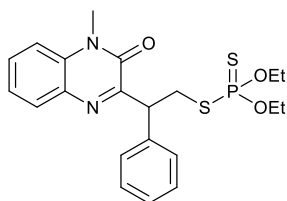

Yellow oil (67 mg, 75%),  $R_f = 0.32$  (petroleum ether/EtOAc, 4:1);  $^1\text{H NMR}$  (400 MHz,  $\text{CDCl}_3$ )  $\delta$  7.96 (dd,  $J = 8.0, 1.4$  Hz, 1H), 7.60 – 7.55 (m, 1H), 7.45 (dd,  $J = 5.2, 3.4$  Hz, 2H), 7.42 – 7.37 (m, 1H), 7.34 – 7.28 (m, 3H), 7.27 – 7.21 (m, 1H), 5.03 (dd,  $J = 9.7, 6.0$  Hz, 1H), 4.26 – 4.10 (m, 4H), 3.87 (m, 1H), 3.65 (s, 3H), 3.47 (m, 1H), 1.45 – 1.34 (m, 6H).  $^{13}\text{C NMR}$  (100 MHz,  $\text{CDCl}_3$ )  $\delta$  158.9, 154.3, 139.6, 133.3, 132.6, 130.4, 128.8, 128.6, 127.6, 123.8, 113.8, 64.0 (t,  $J = 5.6$  Hz), 48.5 (d,  $J = 4.1$  Hz), 36.5 (d,  $J = 3.8$

Hz), 29.3, 16.0 (dd,  $J = 8.5, 4.3$  Hz).  $^{31}\text{P}$  NMR (162 MHz,  $\text{CDCl}_3$ )  $\delta$  94.6. **HRMS** (ESI) calculated for  $\text{C}_{21}\text{H}_{26}\text{N}_2\text{O}_3\text{PS}_2^+$  Exact Mass:  $[\text{M}+\text{H}]^+$ : 449.1117; found: 449.1113.

***O,O*-diethyl *S*-(2-(4-ethyl-3-oxo-3,4-dihydroquinoxalin-2-yl)-2-phenylethyl) phosphorodithioate (5)**

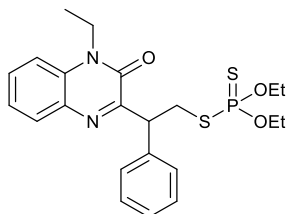

Yellow oil (68 mg, 74%),  $R_f = 0.33$  (petroleum ether/EtOAc, 4:1);  $^1\text{H}$  NMR (400 MHz,  $\text{CDCl}_3$ )  $\delta$  7.97 (dd,  $J = 8.0, 1.4$  Hz, 1H), 7.60 – 7.55 (m, 1H), 7.48 – 7.42 (m, 2H), 7.41 – 7.35 (m, 1H), 7.35 – 7.28 (m, 3H), 7.25 (m, 1H), 5.03 (dd,  $J = 9.7, 6.1$  Hz, 1H), 4.40 – 4.03 (m, 6H), 3.86 (m, 1H), 3.47 (m, 1H), 1.40 (dd,  $J = 15.6, 7.3$  Hz, 6H), 1.34 (t,  $J = 7.2$  Hz, 3H).  $^{13}\text{C}$  NMR (100 MHz,  $\text{CDCl}_3$ )  $\delta$  158.9, 153.8, 139.7, 132.9, 132.3, 130.6, 130.3, 128.8, 128.6, 127.5, 123.5, 113.6, 64.0 (t,  $J = 5.5$  Hz), 48.3 (d,  $J = 4.1$  Hz), 37.6, 36.5 (d,  $J = 3.8$  Hz), 16.0 (dd,  $J = 8.5, 4.2$  Hz), 12.5.  $^{31}\text{P}$  NMR (162 MHz,  $\text{CDCl}_3$ )  $\delta$  94.6. **HRMS** (ESI) calculated for  $\text{C}_{22}\text{H}_{28}\text{N}_2\text{O}_3\text{PS}_2^+$  Exact Mass:  $[\text{M}+\text{H}]^+$ : 463.1273; found: 463.1269.

***O,O*-diethyl *S*-(2-(4-isobutyl-3-oxo-3,4-dihydroquinoxalin-2-yl)-2-phenylethyl) phosphorodithioate (6)**

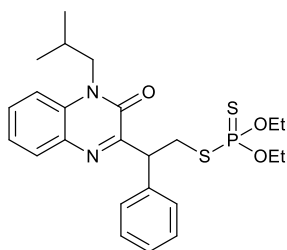

Yellow oil (70.6 mg, 72%),  $R_f = 0.32$  (petroleum ether/EtOAc, 4:1),  $^1\text{H}$  NMR (400 MHz,  $\text{CDCl}_3$ )  $\delta$  7.96 (dd,  $J = 8.0, 1.5$  Hz, 1H), 7.54 (m, 1H), 7.47 – 7.16 (m, 7H), 5.02 (dd,  $J = 9.7, 6.0$  Hz, 1H), 4.29 – 4.05 (m, 5H), 4.04 – 3.78 (m, 2H), 3.51 – 3.42 (m, 1H),

2.21 (m, 1H), 1.40 (m, 6H), 0.94 (dd,  $J = 26.7, 6.7$  Hz, 6H).  $^{13}\text{C}$  NMR (100 MHz,  $\text{CDCl}_3$ )  $\delta$  159.0, 154.5, 139.7, 132.8, 132.8, 130.6, 130.1, 128.8, 128.5, 127.5, 123.5, 114.2, 64.0 (t,  $J = 5.6$  Hz), 49.1, 48.5 (d,  $J = 4.0$  Hz), 36.6 (d,  $J = 3.8$  Hz), 27.3, 20.2 (d,  $J = 3.0$  Hz), 16.0 (dd,  $J = 8.6, 4.3$  Hz). **HRMS** (ESI) calculated for  $\text{C}_{24}\text{H}_{32}\text{N}_2\text{O}_3\text{PS}_2^+$  Exact Mass:  $[\text{M}+\text{H}]^+$ : 491.1586; found: 491.1582.

***O,O*-diethyl *S*-(2-(4-(3-methoxypropyl)-3-oxo-3,4-dihydroquinoxalin-2-yl)-2-phenylethyl) phosphorodithioate (7)**

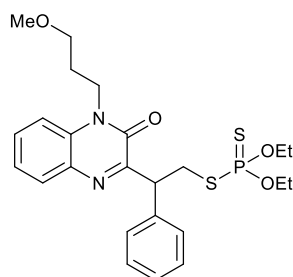

Yellow oil (69.8 mg, 69%),  $R_f = 0.26$  (petroleum ether/EtOAc, 3:1),  $^1\text{H}$  NMR (400 MHz,  $\text{CDCl}_3$ )  $\delta$  7.96 (dd,  $J = 8.0, 1.4$  Hz, 1H), 7.59 – 7.54 (m, 1H), 7.47 – 7.41 (m, 3H), 7.41 – 7.35 (m, 1H), 7.34 – 7.28 (m, 2H), 7.24 (m, 1H), 5.01 (dd,  $J = 9.6, 6.1$  Hz, 1H), 4.41 – 4.06 (m, 6H), 3.86 (m, 1H), 3.52 – 3.45 (m, 1H), 3.43 (t,  $J = 5.7$  Hz, 2H), 3.33 (s, 3H), 2.04 – 1.90 (m, 2H), 1.40 (dd,  $J = 15.5, 7.3$  Hz, 6H).  $^{13}\text{C}$  NMR (100 MHz,  $\text{CDCl}_3$ )  $\delta$  158.8, 154.2, 139.7, 132.8, 132.7, 130.5, 130.4, 128.8, 128.6, 127.5, 123.6, 113.9, 69.9, 64.0 (t,  $J = 5.5$  Hz), 58.9, 48.4 (d,  $J = 4.2$  Hz), 40.2, 36.5 (d,  $J = 3.8$  Hz), 27.7, 16.0 (dd,  $J = 8.6, 4.3$  Hz). **HRMS** (ESI) calculated for  $\text{C}_{24}\text{H}_{32}\text{N}_2\text{O}_4\text{PS}_2^+$  Exact Mass:  $[\text{M}+\text{H}]^+$ : 507.1536; found: 507.1530.

***O,O*-diethyl *S*-(2-(3-oxo-4-(3-phenoxypropyl)-3,4-dihydroquinoxalin-2-yl)-2-phenylethyl) phosphorodithioate (8)**

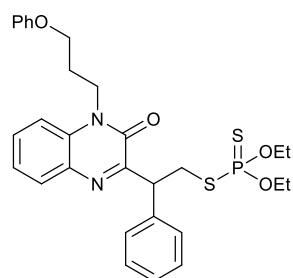



Yellow oil (72.7 mg, 64%),  $R_f = 0.22$  (petroleum ether/EtOAc, 3:1),  $^1\text{H NMR}$  (400 MHz,  $\text{CDCl}_3$ )  $\delta$  7.97 (dd,  $J = 8.0, 1.4$  Hz, 1H), 7.52 – 7.49 (m, 1H), 7.46 – 7.41 (m, 4H), 7.40 – 7.37 (m, 1H), 7.34 – 7.30 (m, 3H), 7.27 – 7.25 (m, 1H), 7.00 – 6.96 (m, 1H), 6.91 – 6.88 (m, 2H), 5.02 (dd,  $J = 9.6, 6.1$  Hz, 1H), 4.47 – 4.37 (m, 2H), 4.26 – 4.14 (m, 4H), 4.06 – 4.04 (m, 2H), 3.86 (m, 1H), 3.47 (m, 1H), 2.31 – 2.06 (m, 2H), 1.42 – 1.37 (m, 6H).  $^{13}\text{C NMR}$  (100 MHz,  $\text{CDCl}_3$ )  $\delta$  158.8, 158.6, 154.2, 139.7, 132.8, 132.6, 130.6, 130.5, 129.7, 128.8, 128.6, 127.6, 123.7, 121.2, 114.6, 113.8, 65.2, 64.0 (d,  $J = 5.5$  Hz), 48.4 (d,  $J = 4.1$  Hz), 40.0, 36.5, 27.3, 16.0 (dd,  $J = 8.5, 3.5$  Hz). **HRMS** (ESI) calculated for  $\text{C}_{29}\text{H}_{34}\text{N}_2\text{O}_4\text{PS}_2^+$  Exact Mass:  $[\text{M}+\text{H}]^+$ : 569.1692; found: 569.1687.

**ethyl 2-(3-(2-((diethoxyphosphorothioyl)thio)-1-phenylethyl)-2-oxoquinoxalin-1(2H)-yl)acetate (9)**

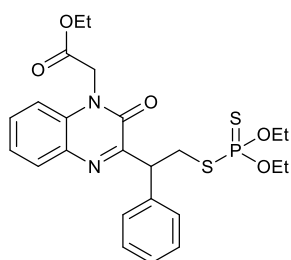

Yellow oil (73.8 mg, 71%),  $R_f = 0.30$  (petroleum ether/EtOAc, 4:1),  $^1\text{H NMR}$  (400 MHz,  $\text{CDCl}_3$ )  $\delta$  7.99 (dd,  $J = 8.0, 1.4$  Hz, 1H), 7.59 – 7.49 (m, 1H), 7.43 – 7.38 (m, 3H), 7.33 – 7.31 (m, 2H), 7.27 – 7.21 (m, 1H), 7.13 – 7.03 (m, 1H), 5.08 – 4.95 (m, 2H), 4.89 (d,  $J = 17.3$  Hz, 1H), 4.27 – 4.15 (m, 4H), 4.15 – 4.04 (m, 2H), 3.85 (m, 1H), 3.48 (m, 1H), 1.42 – 1.35 (m, 6H), 1.23 (t,  $J = 7.1$  Hz, 3H).  $^{13}\text{C NMR}$  (100 MHz,  $\text{CDCl}_3$ )  $\delta$  167.1, 158.8, 153.9, 139.4, 132.7, 132.5, 130.8, 130.5, 128.9, 128.6, 127.6, 124.1, 113.3, 64.0 (d,  $J = 3.3$  Hz), 62.2, 48.5 (d,  $J = 4.2$  Hz), 43.8, 36.6, 16.0 (dd,  $J = 8.5, 3.6$  Hz), 14.2. **HRMS** (ESI) calculated for  $\text{C}_{24}\text{H}_{30}\text{N}_2\text{O}_5\text{PS}_2^+$  Exact Mass:  $[\text{M}+\text{H}]^+$ : 521.1328; found: 521.1322.

**methyl 3-(3-(2-((diethoxyphosphorothioyl)thio)-1-phenylethyl)-2-oxoquinoxalin-1(2H)-yl)propanoate (10)**

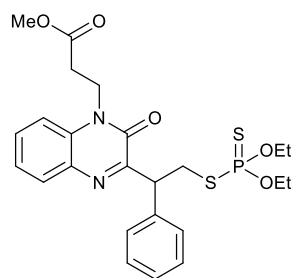

Yellow oil (76 mg, 73%),  $R_f = 0.30$  (petroleum ether/EtOAc, 4:1),  $^1\text{H NMR}$  (400 MHz,  $\text{CDCl}_3$ )  $\delta$  7.97 (dd,  $J = 8.0, 1.4$  Hz, 1H), 7.66 – 7.55 (m, 1H), 7.47 – 7.15 (m, 8H), 5.00 (dd,  $J = 9.7, 6.1$  Hz, 1H), 4.49 (dd,  $J = 9.5, 6.0$  Hz, 2H), 4.33 – 4.05 (m, 4H), 3.90 – 3.80 (m, 1H), 3.65 (s, 3H), 3.50 – 3.42 (m, 1H), 2.80 – 2.65 (m, 2H), 1.45 – 1.35 (m, 6H).  $^{13}\text{C NMR}$  (100 MHz,  $\text{CDCl}_3$ )  $\delta$  171.3, 158.8, 154.0, 139.5, 132.9, 132.2, 130.8, 130.6, 128.8, 128.6, 127.6, 123.9, 113.4, 64.0 (t,  $J = 5.5$  Hz), 52.1, 48.4 (d,  $J = 4.1$  Hz), 38.4, 36.5, 31.7, 16.0 (dd,  $J = 8.5, 4.2$  Hz). **HRMS** (ESI) calculated for  $\text{C}_{24}\text{H}_{30}\text{N}_2\text{O}_5\text{PS}_2^+$  Exact Mass:  $[\text{M}+\text{H}]^+$ : 521.1328; found: 521.1323.

***tert*-butyl (3-(3-(2-((diethoxyphosphorothioyl)thio)-1-phenylethyl)-2-oxoquinoxalin-1(2H)-yl)propyl)carbamate (11)**

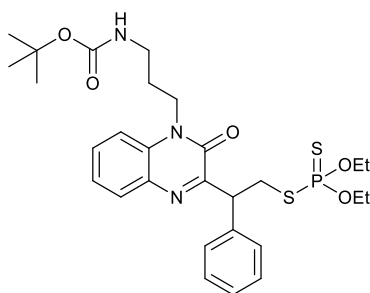

Yellow oil (61.5 mg, 52%),  $R_f = 0.21$  (petroleum ether/EtOAc, 2:1),  $^1\text{H NMR}$  (400 MHz,  $\text{CDCl}_3$ )  $\delta$  7.97 (dd,  $J = 8.0, 1.4$  Hz, 1H), 7.62 – 7.51 (m, 1H), 7.43 – 7.40 (m, 3H), 7.34 – 7.29 (m, 3H), 7.26 – 7.22 (m, 1H), 5.25 (s, 1H), 5.03 (dd,  $J = 9.7, 6.0$  Hz, 1H), 4.35 (dd,  $J = 13.4, 6.6$  Hz, 1H), 4.29 – 4.05 (m, 5H), 3.94 – 3.75 (m, 1H), 3.46 (m, 1H), 3.19 – 2.92 (m, 2H), 1.94 – 1.88 (m, 2H), 1.46 (s, 9H), 1.42 – 1.34 (m, 6H).  $^{13}\text{C NMR}$  (100 MHz,  $\text{CDCl}_3$ )  $\delta$  158.7, 156.2, 154.5, 139.6, 133.0, 132.2, 130.7, 130.5, 128.8, 128.5, 127.6), 123.9, 113.7, 79.4, 64.0 (t,  $J = 5.6$  Hz), 48.4 (d,  $J = 4.0$  Hz), 39.8, 37.3,

36.6, 28.6, 27.7, 16.0 (dd,  $J = 8.5, 3.6$  Hz). **HRMS** (ESI) calculated for  $C_{28}H_{39}N_3O_5PS_2^+$   
Exact Mass:  $[M+H]^+$ : 592.2063; found: 592.2059.

***O,O*-diethyl *S*-(2-(4-(2-hydroxyethyl)-3-oxo-3,4-dihydroquinoxalin-2-yl)-2-phenylethyl) phosphorodithioate (12)**

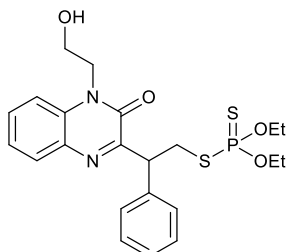

Yellow oil (37.3 mg, 39%),  $R_f = 0.32$  (petroleum ether/EtOAc, 1:1),  $^1H$  NMR (400 MHz,  $CDCl_3$ )  $\delta$  7.98 (dd,  $J = 8.0, 1.4$  Hz, 1H), 7.62 – 7.52 (m, 1H), 7.47 – 7.37 (m, 5H), 7.31 (dd,  $J = 10.1, 4.7$  Hz, 2H), 7.25 (d,  $J = 7.3$  Hz, 1H), 5.01 (dd,  $J = 9.6, 6.1$  Hz, 1H), 4.51 – 4.30 (m, 2H), 4.29 – 4.05 (m, 4H), 3.99 (t,  $J = 5.5$  Hz, 2H), 3.90 – 3.81 (m, 1H), 3.51-3.43 (m, 1H), 1.44 – 1.33 (m, 6H).  $^{13}C$  NMR (100 MHz,  $CDCl_3$ )  $\delta$  158.7, 155.2, 139.5, 132.9, 132.8, 130.7, 130.4, 128.8, 128.6, 127.6, 124.0, 114.0, 64.0 (t,  $J = 5.2$  Hz), 60.6, 48.4 (d,  $J = 4.0$  Hz), 45.2, 36.6 (d,  $J = 3.8$  Hz), 16.0 (dd,  $J = 8.5, 4.0$  Hz). **HRMS** (ESI) calculated for  $C_{22}H_{28}N_2O_4PS_2^+$  Exact Mass:  $[M+H]^+$ : 479.1223; found: 479.1217.

***O,O*-diethyl *S*-(2-(3-oxo-4-((trimethylsilyl)methyl)-3,4-dihydroquinoxalin-2-yl)-2-phenylethyl) phosphorodithioate (13)**

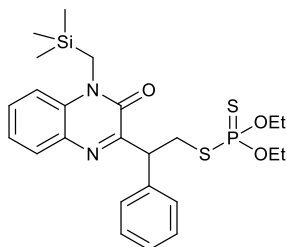

Yellow oil (76 mg, 73%),  $R_f = 0.41$  (petroleum ether/EtOAc, 4:1),  $^1H$  NMR (400 MHz,  $CDCl_3$ )  $\delta$  7.96 (dd,  $J = 8.0, 1.5$  Hz, 1H), 7.55 (m, 1H), 7.47 – 7.17 (m, 7H), 5.02 (dd,  $J = 9.8, 5.9$  Hz, 1H), 4.33 – 4.05 (m, 4H), 3.98 – 3.81 (m, 2H), 3.75 (d,  $J = 14.9$  Hz, 1H), 3.51 – 3.43 (m, 1H), 1.49 – 1.34 (m, 6H), 0.07 – -0.05 (m, 9H).  $^{13}C$  NMR (100 MHz,

CDCl<sub>3</sub>)  $\delta$  158.4, 153.9, 139.8, 133.2, 132.9, 130.5, 129.9, 128.7, 128.5, 127.4, 123.4, 114.5, 63.9 (t,  $J = 5.8$  Hz), 48.6 (d,  $J = 4.1$  Hz), 36.5 (d,  $J = 3.9$  Hz), 34.2, 16.0 (dd,  $J = 8.6, 4.1$  Hz), -1.3. **HRMS** (ESI) calculated for C<sub>24</sub>H<sub>34</sub>N<sub>2</sub>O<sub>3</sub>PS<sub>2</sub>Si<sup>+</sup> Exact Mass: [M+H]<sup>+</sup>: 521.1512; found: 521.1506.

***S*-(2-(4-allyl-3-oxo-3,4-dihydroquinoxalin-2-yl)-2-phenylethyl) *O,O*-diethyl phosphorodithioate (14)**

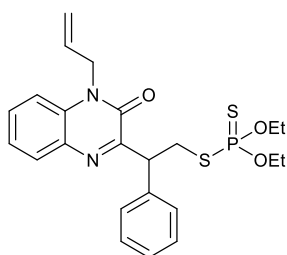

Yellow oil (62.5 mg, 66%),  $R_f = 0.36$  (petroleum ether/EtOAc, 4:1), <sup>1</sup>H NMR (400 MHz, CDCl<sub>3</sub>)  $\delta$  7.96 (dd,  $J = 8.0, 1.4$  Hz, 1H), 7.56 – 7.52 (m, 1H), 7.47 – 7.41 (m, 2H), 7.41 – 7.35 (m, 1H), 7.33 – 7.23 (m, 4H), 5.89 (m, 1H), 5.24 (m, 1H), 5.14 (dd,  $J = 17.3, 0.6$  Hz, 1H), 5.03 (dd,  $J = 9.7, 6.1$  Hz, 1H), 4.95 – 4.89 (m, 1H), 4.82 – 4.71 (m, 1H), 4.28 – 4.04 (m, 4H), 3.91 – 3.81 (m, 1H), 3.51 – 3.43 (m, 1H), 1.40 (dd,  $J = 14.9, 7.5$  Hz, 6H). <sup>13</sup>C NMR (100 MHz, CDCl<sub>3</sub>)  $\delta$  159.0, 153.9, 139.6, 132.8, 132.6, 130.7, 130.5, 130.3, 128.8, 128.6, 127.6, 123.7, 118.3, 114.3, 64.0 (t,  $J = 5.2$  Hz), 48.4 (d,  $J = 4.2$  Hz), 44.8, 36.6, 16.0 (dd,  $J = 8.6, 3.8$  Hz). **HRMS** (ESI) calculated for C<sub>23</sub>H<sub>28</sub>N<sub>2</sub>O<sub>3</sub>PS<sub>2</sub><sup>+</sup> Exact Mass: [M+H]<sup>+</sup>: 475.1273; found: 475.1269.

***S*-(2-(4-(but-3-en-1-yl)-3-oxo-3,4-dihydroquinoxalin-2-yl)-2-phenylethyl) *O,O*-diethyl phosphorodithioate (15)**

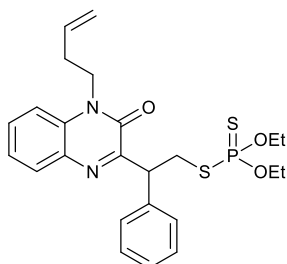

Yellow oil (66.4 mg, 68%),  $R_f = 0.36$  (petroleum ether/EtOAc, 4:1),  $^1\text{H NMR}$  (400 MHz,  $\text{CDCl}_3$ )  $\delta$  7.97 (dd,  $J = 8.0, 1.4$  Hz, 1H), 7.57 – 7.55 (m, 1H), 7.44 – 7.37 (m, 3H), 7.35 – 7.27 (m, 3H), 7.27 – 7.21 (m, 1H), 5.82 (m, 1H), 5.12 – 4.95 (m, 3H), 4.36 – 4.08 (m, 6H), 3.85 (m, 1H), 3.46 (m, 1H), 2.46 (dd,  $J = 14.8, 7.4$  Hz, 2H), 1.47 – 1.34 (m, 6H).  $^{13}\text{C NMR}$  (100 MHz,  $\text{CDCl}_3$ )  $\delta$  158.9, 154.0, 139.6, 133.9, 132.8, 132.4, 130.7, 130.3, 128.8, 128.6, 127.5, 123.6, 117.8, 113.7, 64.0 (t,  $J = 5.6$  Hz), 48.4 (d,  $J = 4.2$  Hz), 41.8, 36.5, 31.5, 16.0 (dd,  $J = 8.6, 4.1$  Hz). **HRMS** (ESI) calculated for  $\text{C}_{24}\text{H}_{30}\text{N}_2\text{O}_3\text{PS}_2^+$  Exact Mass:  $[\text{M}+\text{H}]^+$ : 489.1430; found: 489.1425.

***O,O*-diethyl *S*-(2-phenyl-2-(4,6,7-trimethyl-3-oxo-3,4-dihydroquinoxalin-2-yl)ethyl) phosphorodithioate (16)**

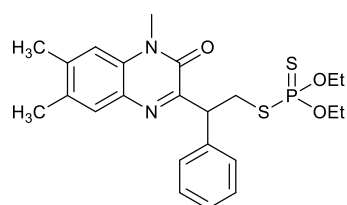

Yellow oil (67.6 mg, 71%),  $R_f = 0.35$  (petroleum ether/EtOAc, 4:1),  $^1\text{H NMR}$  (400 MHz,  $\text{CDCl}_3$ )  $\delta$  7.72 (s, 1H), 7.44 – 7.40 (m, 2H), 7.32 – 7.28 (m, 2H), 7.26 – 7.19 (m, 1H), 7.06 (s, 1H), 4.99 (dd,  $J = 9.7, 6.1$  Hz, 1H), 4.26 – 4.10 (m, 4H), 3.84 (m, 1H), 3.62 (s, 3H), 3.44 (m, 1H), 2.44 (s, 3H), 2.40 (s, 3H), 1.43 – 1.37 (m, 6H).  $^{13}\text{C NMR}$  (100 MHz,  $\text{CDCl}_3$ )  $\delta$  157.6, 154.4, 140.2, 139.9, 132.7, 131.4, 131.0, 130.5, 128.8, 128.6, 127.5, 114.3, 64.0 (t,  $J = 5.7$  Hz), 48.4 (d,  $J = 4.2$  Hz), 36.6, 29.2, 20.7, 19.3, 16.0 (dd,  $J = 8.5, 4.3$  Hz). **HRMS** (ESI) calculated for  $\text{C}_{23}\text{H}_{30}\text{N}_2\text{O}_3\text{PS}_2^+$  Exact Mass:  $[\text{M}+\text{H}]^+$ : 477.1430; found: 477.1425.

***S*-(2-(6,7-dichloro-4-methyl-3-oxo-3,4-dihydroquinoxalin-2-yl)-2-phenylethyl) *O,O*-diethyl phosphorodithioate (17)**

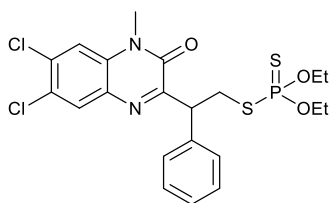

Yellow oil (64 mg, 62%),  $R_f = 0.30$  (petroleum ether/EtOAc, 4:1),  $^1\text{H NMR}$  (400 MHz,  $\text{CDCl}_3$ )  $\delta$  8.06 (s, 1H), 7.43 – 7.38 (m, 3H), 7.34 – 7.30 (m, 2H), 7.28 – 7.23 (m, 1H), 5.01 (dd,  $J = 9.7, 6.0$  Hz, 1H), 4.27 – 4.09 (m, 4H), 3.86 – 3.72 (m, 1H), 3.63 (s, 3H), 3.48 – 3.39 (m, 1H), 1.43 – 1.37 (m, 6H).  $^{13}\text{C NMR}$  (100 MHz,  $\text{CDCl}_3$ )  $\delta$  160.6, 153.8, 139.0, 134.5, 132.8, 131.6, 131.1, 128.9, 128.6, 127.8, 127.6, 115.3, 64.1 (t,  $J = 5.8$  Hz), 48.7 (d,  $J = 3.8$  Hz), 36.4 (d,  $J = 3.6$  Hz), 29.5, 16.0 (dd,  $J = 8.4, 4.6$  Hz). **HRMS** (ESI) calculated for  $\text{C}_{21}\text{H}_{24}\text{Cl}_2\text{N}_2\text{O}_3\text{PS}_2^+$  Exact Mass:  $[\text{M}+\text{H}]^+$ : 517.0338; found: 517.0333.

***O,O*-dimethyl *S*-(2-(4-methyl-3-oxo-3,4-dihydroquinoxalin-2-yl)-2-phenylethyl) phosphorodithioate (18)**

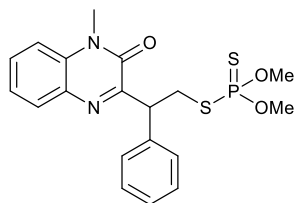

Yellow oil (64 mg, 76%),  $R_f = 0.33$  (petroleum ether/EtOAc, 4:1),  $^1\text{H NMR}$  (400 MHz,  $\text{CDCl}_3$ )  $\delta$  7.97 (dd,  $J = 8.0, 1.4$  Hz, 1H), 7.60 – 7.58 (m, 1H), 7.46 – 7.38 (m, 3H), 7.35 – 7.29 (m, 3H), 7.27 – 7.21 (m, 1H), 5.01 (dd,  $J = 9.6, 6.1$  Hz, 1H), 3.93 – 3.82 (m, 1H), 3.80 (s, 3H), 3.77 (s, 3H), 3.65 (s, 3H), 3.45 (m, 1H).  $^{13}\text{C NMR}$  (100 MHz,  $\text{CDCl}_3$ )  $\delta$  158.8, 154.4, 139.4, 133.3, 132.6, 130.4, 130.4, 128.8, 128.6, 127.6, 123.8, 113.8, 54.1 (t,  $J = 5.1$  Hz), 48.4 (d,  $J = 4.0$  Hz), 36.6 (d,  $J = 3.8$  Hz), 29.3. **HRMS** (ESI) calculated for  $\text{C}_{19}\text{H}_{22}\text{N}_2\text{O}_3\text{PS}_2^+$  Exact Mass:  $[\text{M}+\text{H}]^+$ : 421.0804; found: 421.0801.

***O,O*-diethyl *S*-(2-(4-methyl-3-oxo-3,4-dihydroquinoxalin-2-yl)-2-(*p*-tolyl)ethyl) phosphorodithioate (19)**

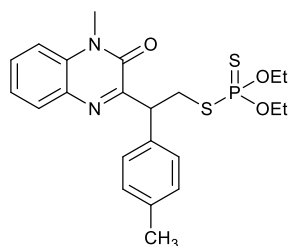

Yellow oil (68.4 mg, 74%),  $R_f = 0.33$  (petroleum ether/EtOAc, 4:1),  $^1\text{H NMR}$  (400 MHz,  $\text{CDCl}_3$ )  $\delta$  7.95 (dd,  $J = 8.0, 1.4$  Hz, 1H), 7.61 – 7.53 (m, 1H), 7.42 – 7.36 (m, 1H), 7.31 (dd,  $J = 11.3, 8.8$  Hz, 3H), 7.12 (d,  $J = 7.9$  Hz, 2H), 4.98 (dd,  $J = 9.7, 6.1$  Hz, 1H), 4.30 – 4.08 (m, 4H), 3.85 (m, 1H), 3.64 (s, 3H), 3.45 (m, 1H), 2.31 (s, 3H), 1.47 – 1.35 (m, 6H).  $^{13}\text{C NMR}$  (101 MHz,  $\text{CDCl}_3$ )  $\delta$  159.0, 154.3, 137.3, 136.5, 133.3, 132.6, 130.3, 130.3, 129.5, 128.4, 123.7, 113.7, 64.0 (t,  $J = 5.7$  Hz), 48.1 (d,  $J = 4.0$  Hz), 36.4 (d,  $J = 3.7$  Hz), 29.2, 21.2, 16.0 (dd,  $J = 8.6, 4.4$  Hz). **HRMS** (ESI) calculated for  $\text{C}_{22}\text{H}_{28}\text{N}_2\text{O}_3\text{PS}_2^+$  Exact Mass:  $[\text{M}+\text{H}]^+$ : 463.1273; found: 463.1267.

***S*-(2-(4-chlorophenyl)-2-(4-methyl-3-oxo-3,4-dihydroquinoxalin-2-yl)ethyl) *O,O*-diethyl phosphorodithioate (20)**

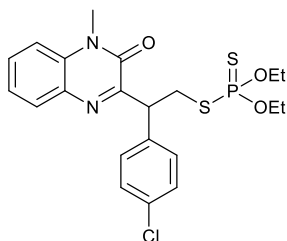

Yellow oil (73.2 mg, 73%),  $R_f = 0.30$  (petroleum ether/EtOAc, 4:1),  $^1\text{H NMR}$  (400 MHz,  $\text{CDCl}_3$ )  $\delta$  7.95 (dd,  $J = 8.0, 1.4$  Hz, 1H), 7.61 – 7.57 (m, 1H), 7.44 – 7.36 (m, 3H), 7.33 – 7.26 (m, 3H), 5.00 (dd,  $J = 9.4, 6.3$  Hz, 1H), 4.24 – 4.12 (m, 4H), 3.83 (m, 1H), 3.65 (s, 3H), 3.44 (m, 1H), 1.43 – 1.37 (m, 6H).  $^{13}\text{C NMR}$  (100 MHz,  $\text{CDCl}_3$ )  $\delta$  158.5, 154.3, 138.1, 133.5, 133.3, 132.5, 130.6, 130.4, 130.0, 129.0, 123.9, 113.8, 64.1 (dd,  $J = 5.7, 4.0$  Hz), 47.9 (d,  $J = 4.0$  Hz), 36.5 (d,  $J = 3.7$  Hz), 29.3, 16.0 (dd,  $J = 8.5, 4.5$  Hz). **HRMS** (ESI) calculated for  $\text{C}_{21}\text{H}_{25}\text{ClN}_2\text{O}_3\text{PS}_2^+$  Exact Mass:  $[\text{M}+\text{H}]^+$ : 483.0727; found: 483.0724.

***S*-(2-(4-bromophenyl)-2-(4-methyl-3-oxo-3,4-dihydroquinoxalin-2-yl)ethyl) *O,O*-diethyl phosphorodithioate (21)**

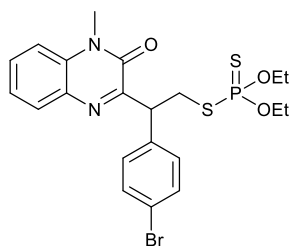

Yellow oil (74.2 mg, 71%),  $R_f = 0.30$  (petroleum ether/EtOAc, 4:1),  $^1\text{H NMR}$  (400 MHz,  $\text{CDCl}_3$ )  $\delta$  7.95 (dd,  $J = 8.0, 1.2$  Hz, 1H), 7.63 – 7.54 (m, 1H), 7.46 – 7.37 (m, 3H), 7.32 (d,  $J = 8.5$  Hz, 3H), 4.99 (dd,  $J = 9.3, 6.3$  Hz, 1H), 4.32 – 4.04 (m, 4H), 3.83 (m, 1H), 3.65 (s, 3H), 3.44 (m, 1H), 1.42 – 1.36 (m, 6H).  $^{13}\text{C NMR}$  (100 MHz,  $\text{CDCl}_3$ )  $\delta$  158.5, 154.3, 138.6, 133.3, 132.5, 131.9, 130.6, 130.5, 130.4, 123.9, 121.7, 113.8, 64.1 (dd,  $J = 5.7, 4.0$  Hz), 48.0 (d,  $J = 4.0$  Hz), 36.4 (d,  $J = 3.6$  Hz), 29.3, 16.0 (dd,  $J = 8.4, 4.5$  Hz). **HRMS** (ESI) calculated for  $\text{C}_{21}\text{H}_{25}\text{BrN}_2\text{O}_3\text{PS}_2^+$  Exact Mass:  $[\text{M}+\text{H}]^+$ : 527.0222; found: 527.0219.

**methyl 4-(2-((diethoxyphosphorothioyl)thio)-1-(4-methyl-3-oxo-3,4-dihydroquinoxalin-2-yl)ethyl)benzoate (22)**

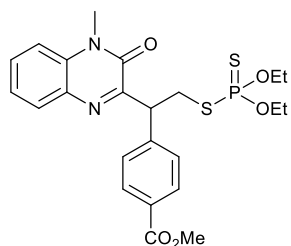

Yellow oil (67.8 mg, 67%),  $R_f = 0.29$  (petroleum ether/EtOAc, 4:1),  $^1\text{H NMR}$  (400 MHz,  $\text{CDCl}_3$ )  $\delta$  8.02 – 7.94 (m, 3H), 7.62 – 7.57 (m, 1H), 7.51 (d,  $J = 8.3$  Hz, 2H), 7.45 – 7.37 (m, 1H), 7.32 (dd,  $J = 8.4, 0.8$  Hz, 1H), 5.08 (dd,  $J = 9.4, 6.3$  Hz, 1H), 4.27 – 4.07 (m, 4H), 3.95 – 3.80 (m, 4H), 3.65 (s, 3H), 3.47 (m, 1H), 1.44 – 1.34 (m, 6H).  $^{13}\text{C NMR}$  (100 MHz,  $\text{CDCl}_3$ )  $\delta$  166.9, 158.3, 154.3, 144.8, 133.4, 132.6, 130.6, 130.5, 130.1, 129.5, 128.7, 123.9, 113.8, 64.1 (t,  $J = 5$  Hz), 52.2, 48.5 (d,  $J = 3.9$  Hz), 36.3 (d,  $J = 3.6$  Hz), 29.3, 16.0 (dd,  $J = 8.4, 4.9$  Hz). **HRMS** (ESI) calculated for  $\text{C}_{23}\text{H}_{28}\text{N}_2\text{O}_5\text{PS}_2^+$  Exact Mass:  $[\text{M}+\text{H}]^+$ : 507.1172; found: 507.1166.

**O,O-diethyl S-(2-(4-methyl-3-oxo-3,4-dihydroquinoxalin-2-yl)-2-(m-tolyl)ethyl)phosphorodithioate (23)**



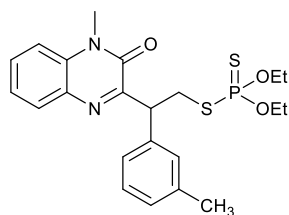

Yellow oil (65.6 mg, 71%),  $R_f = 0.31$  (petroleum ether/EtOAc, 4:1),  $^1\text{H NMR}$  (400 MHz,  $\text{CDCl}_3$ )  $\delta$  7.97 (dd,  $J = 8.0, 1.4$  Hz, 1H), 7.60 – 7.56 (m, 1H), 7.44 – 7.36 (m, 1H), 7.31 (dd,  $J = 8.4, 0.8$  Hz, 1H), 7.20 (dd,  $J = 13.4, 6.3$  Hz, 3H), 7.06 (d,  $J = 7.0$  Hz, 1H), 4.98 (dd,  $J = 9.8, 5.9$  Hz, 1H), 4.26 – 4.12 (m, 4H), 3.85 (m, 1H), 3.65 (s, 3H), 3.44 (m, 1H), 2.33 (s, 3H), 1.44 – 1.37 (m, 6H).  $^{13}\text{C NMR}$  (100 MHz,  $\text{CDCl}_3$ )  $\delta$  158.9, 154.4, 139.5, 138.4, 133.4, 132.6, 130.4, 130.3, 129.3, 128.7, 128.4, 125.6, 123.7, 113.7, 64.0 (t,  $J = 5.9$  Hz), 48.5 (d,  $J = 4.1$  Hz), 36.5 (d,  $J = 3.7$  Hz), 29.3, 21.6, 16.0 (dd,  $J = 8.5, 4.4$  Hz). **HRMS** (ESI) calculated for  $\text{C}_{22}\text{H}_{28}\text{N}_2\text{O}_3\text{PS}_2^+$  Exact Mass:  $[\text{M}+\text{H}]^+$ : 463.1273; found: 463.1270.

***S*-(2-(3-chlorophenyl)-2-(4-methyl-3-oxo-3,4-dihydroquinoxalin-2-yl)ethyl) *O,O*-diethyl phosphorodithioate (24)**

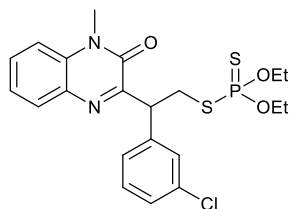

Yellow oil (67.5 mg, 70%),  $R_f = 0.31$  (petroleum ether/EtOAc, 4:1),  $^1\text{H NMR}$  (400 MHz,  $\text{CDCl}_3$ )  $\delta$  7.97 (dd,  $J = 8.0, 1.4$  Hz, 1H), 7.62 – 7.58 (m, 1H), 7.45 – 7.31 (m, 4H), 7.28 – 7.20 (m, 2H), 5.00 (dd,  $J = 9.5, 6.2$  Hz, 1H), 4.30 – 4.07 (m, 4H), 3.83 (m, 1H), 3.66 (s, 3H), 3.44 (m, 1H), 1.43 – 1.37 (m, 6H).  $^{13}\text{C NMR}$  (100 MHz,  $\text{CDCl}_3$ )  $\delta$  158.3, 154.3, 141.6, 134.6, 133.4, 132.6, 130.6, 130.5, 130.1, 128.4, 127.9, 127.2, 123.9, 113.8, 64.1 (t,  $J = 5.5$  Hz), 48.2 (d,  $J = 4.0$  Hz), 36.5, 29.3, 16.0 (dd,  $J = 8.4, 4.9$  Hz). **HRMS** (ESI) calculated for  $\text{C}_{21}\text{H}_{25}\text{ClN}_2\text{O}_3\text{PS}_2^+$  Exact Mass:  $[\text{M}+\text{H}]^+$ : 483.0727; found: 483.0723.

***S*-(2-(2-chlorophenyl)-2-(4-methyl-3-oxo-3,4-dihydroquinoxalin-2-yl)ethyl) *O,O*-diethyl phosphorodithioate (25)**

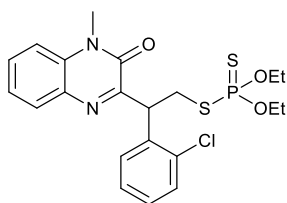

Yellow oil (60.7 mg, 63%),  $R_f = 0.30$  (petroleum ether/EtOAc, 4:1),  $^1\text{H NMR}$  (400 MHz,  $\text{CDCl}_3$ )  $\delta$  7.98 (dd,  $J = 8.0, 1.4$  Hz, 1H), 7.63 – 7.59 (m, 1H), 7.48 – 7.39 (m, 2H), 7.34 (dd,  $J = 8.4, 0.9$  Hz, 1H), 7.22 – 7.10 (m, 3H), 5.51 (dd,  $J = 10.0, 5.4$  Hz, 1H), 4.27 – 4.12 (m, 4H), 3.82 – 3.68 (m, 1H), 3.66 (d,  $J = 2.7$  Hz, 3H), 3.40 (m, 1H), 1.43 – 1.37 (m, 6H).  $^{13}\text{C NMR}$  (100 MHz,  $\text{CDCl}_3$ )  $\delta$  158.3, 154.2, 137.4, 135.0, 133.4, 132.4, 130.7, 130.5, 130.3, 128.7, 128.5, 127.0, 123.8, 113.8, 64.0 (dd,  $J = 15.7, 5.5$  Hz), 45.0 (d,  $J = 4.4$  Hz), 35.3 (d,  $J = 4.1$  Hz), 29.3, 16.0 (dd,  $J = 8.4, 5.2$  Hz). **HRMS** (ESI) calculated for  $\text{C}_{21}\text{H}_{25}\text{ClN}_2\text{O}_3\text{PS}_2^+$  Exact Mass:  $[\text{M}+\text{H}]^+$ : 483.0727; found: 483.0722.

***O,O*-diethyl *S*-(2-(4-methyl-3-oxo-3,4-dihydroquinoxalin-2-yl)-2-phenylethyl) phosphorothioate (27)**

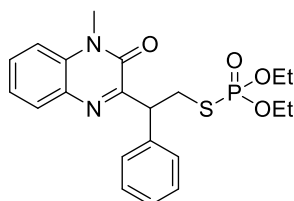

Yellow oil (26.8 mg, 31%),  $R_f = 0.25$  (petroleum ether/EtOAc, 4:1),  $^1\text{H NMR}$  (400 MHz,  $\text{CDCl}_3$ )  $\delta$  7.96 (dd,  $J = 8.0, 1.4$  Hz, 1H), 7.57 (ddd,  $J = 8.6, 7.5, 1.5$  Hz, 1H), 7.46 – 7.37 (m, 3H), 7.34 – 7.15 (m, 5H), 5.01 (dd,  $J = 9.3, 6.4$  Hz, 1H), 4.27 – 4.05 (m, 4H), 3.90 – 3.81 (m, 1H), 3.65 (s, 3H), 3.49 – 3.41 (m, 1H), 1.46 – 1.33 (m, 6H).  $^{13}\text{C NMR}$  (100 MHz,  $\text{CDCl}_3$ )  $\delta$  158.9, 154.3, 139.4, 133.3, 132.6, 130.4, 128.8, 128.7, 127.6, 123.8, 113.8, 63.6 (t,  $J = 5.3$  Hz), 48.7 (d,  $J = 5.0$  Hz), 34.1 (d,  $J = 3.6$  Hz), 29.3, 16.2 (dd,  $J = 7.3, 2.2$  Hz). **HRMS** (ESI) calculated for  $\text{C}_{21}\text{H}_{26}\text{N}_2\text{O}_4\text{PS}^+$  Exact Mass:  $[\text{M}+\text{H}]^+$ : 433.1345; found: 433.1341.

## 10. The NMR spectra

### $^1\text{H}$ NMR of 4

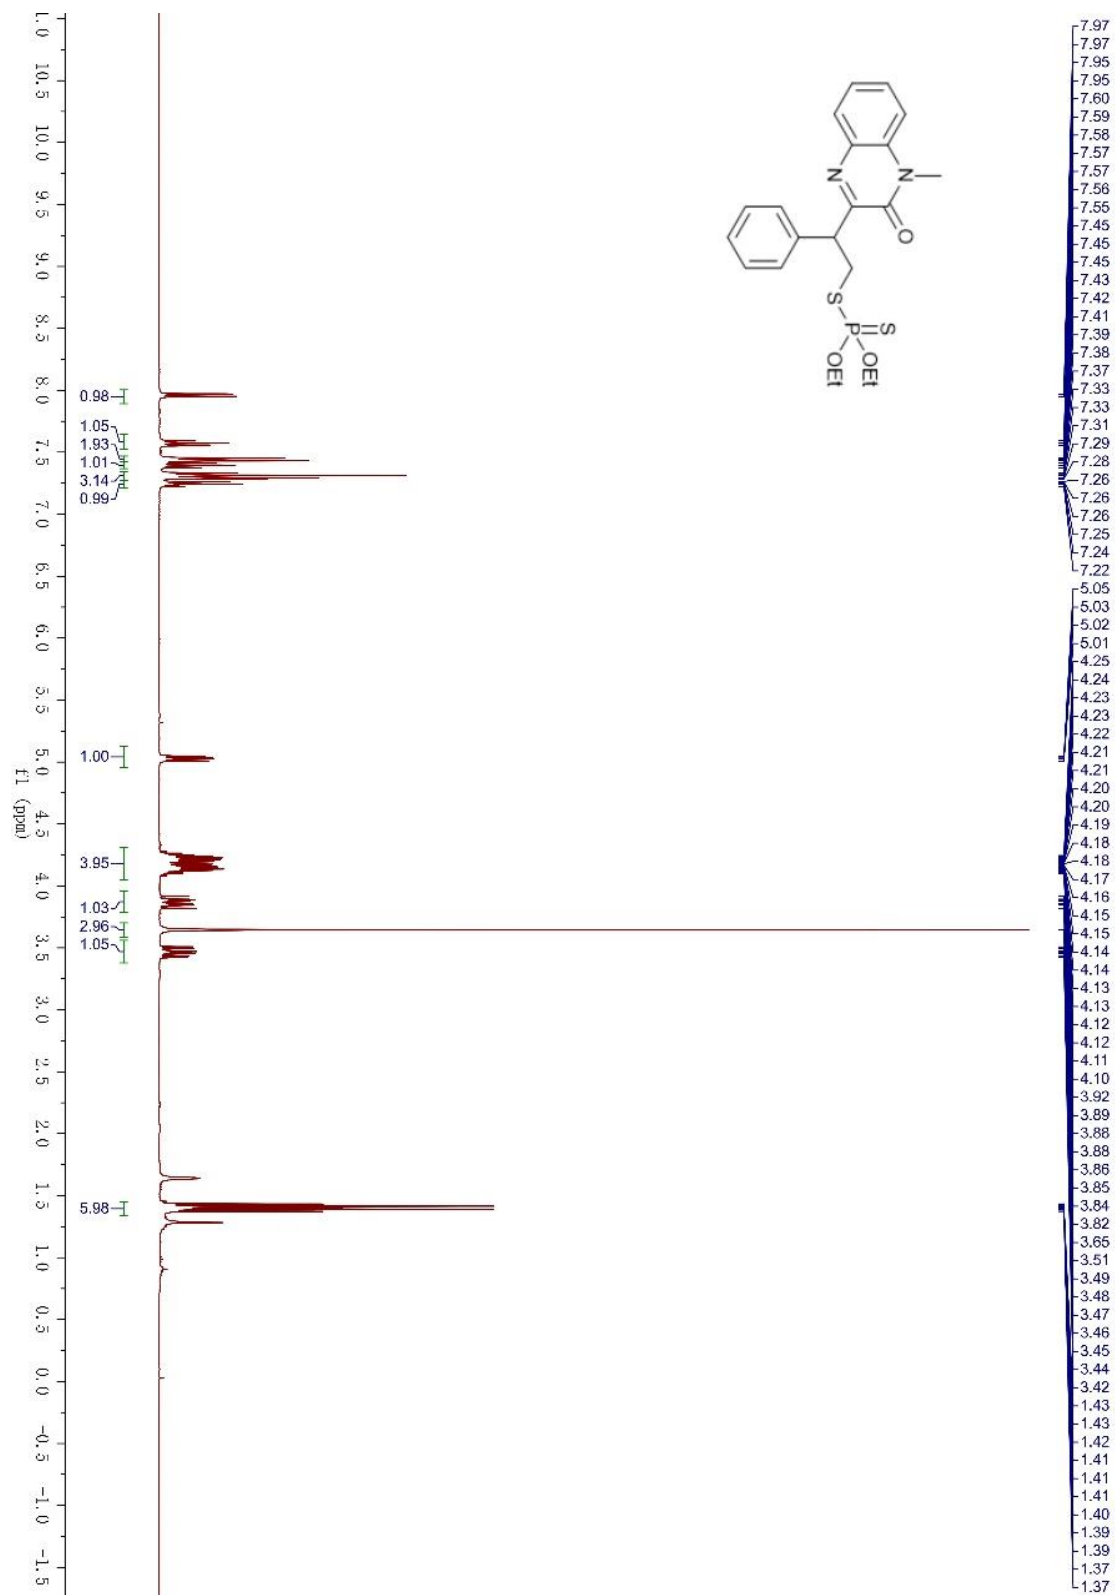

<sup>13</sup>C NMR of 4

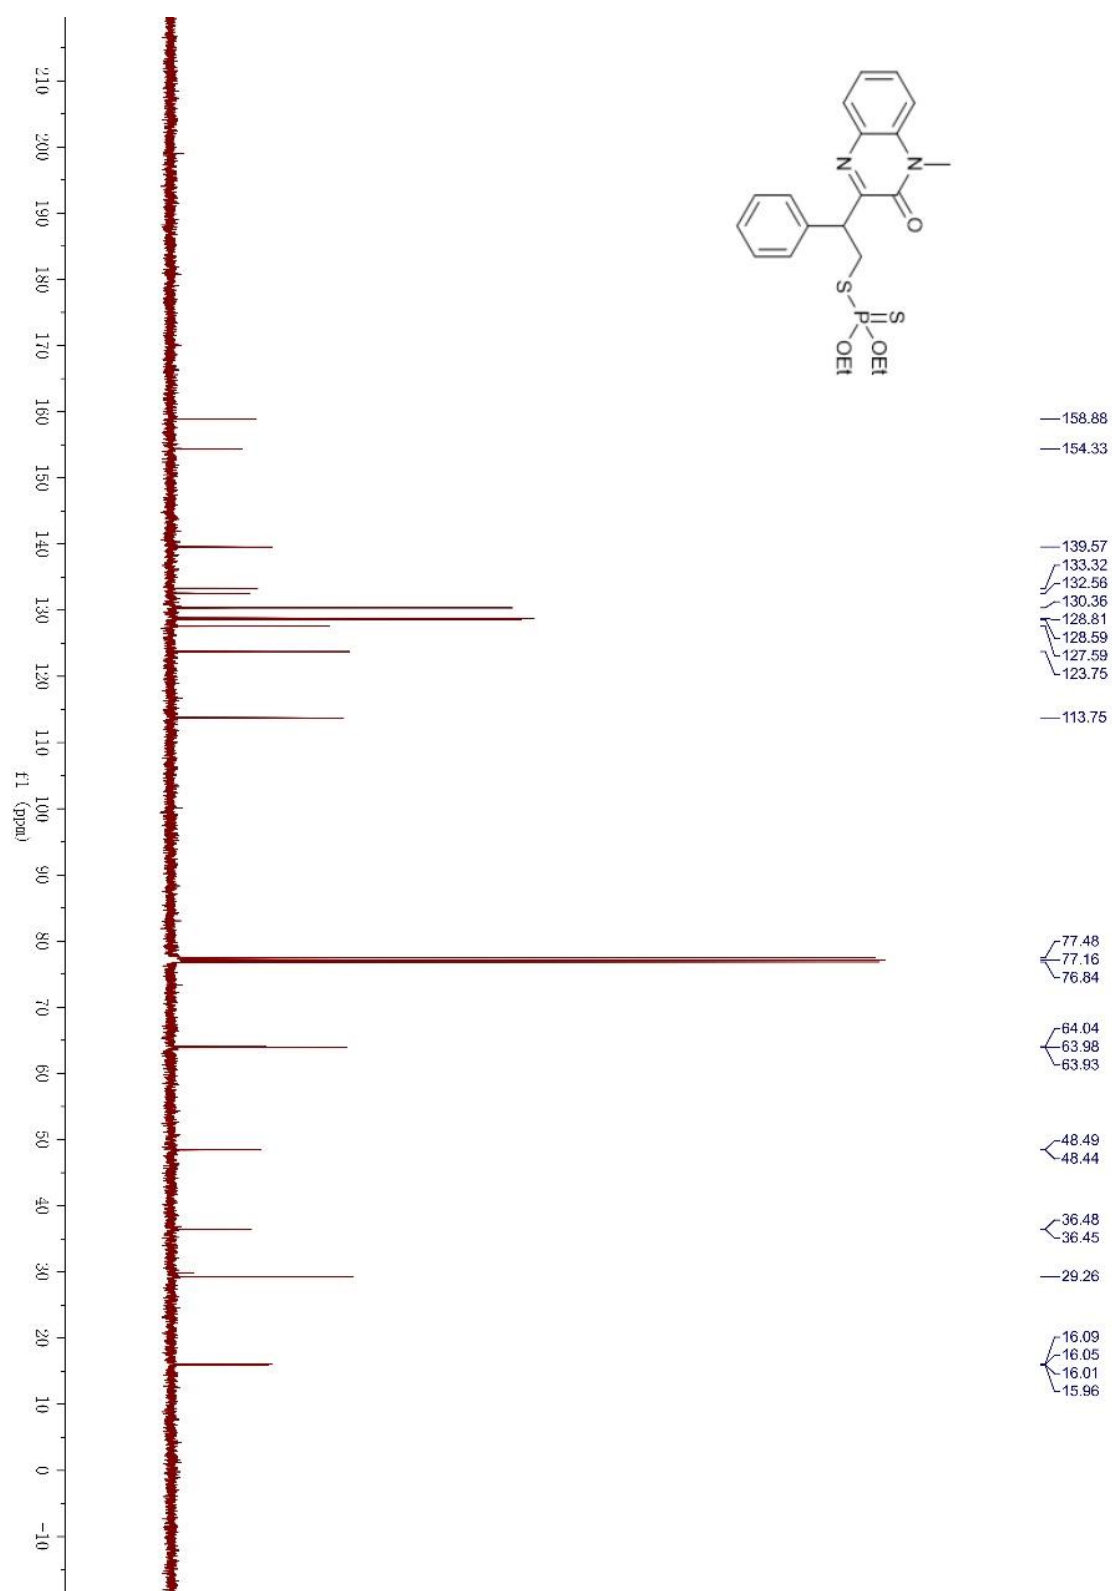

# $^1\text{H}$ NMR of 5

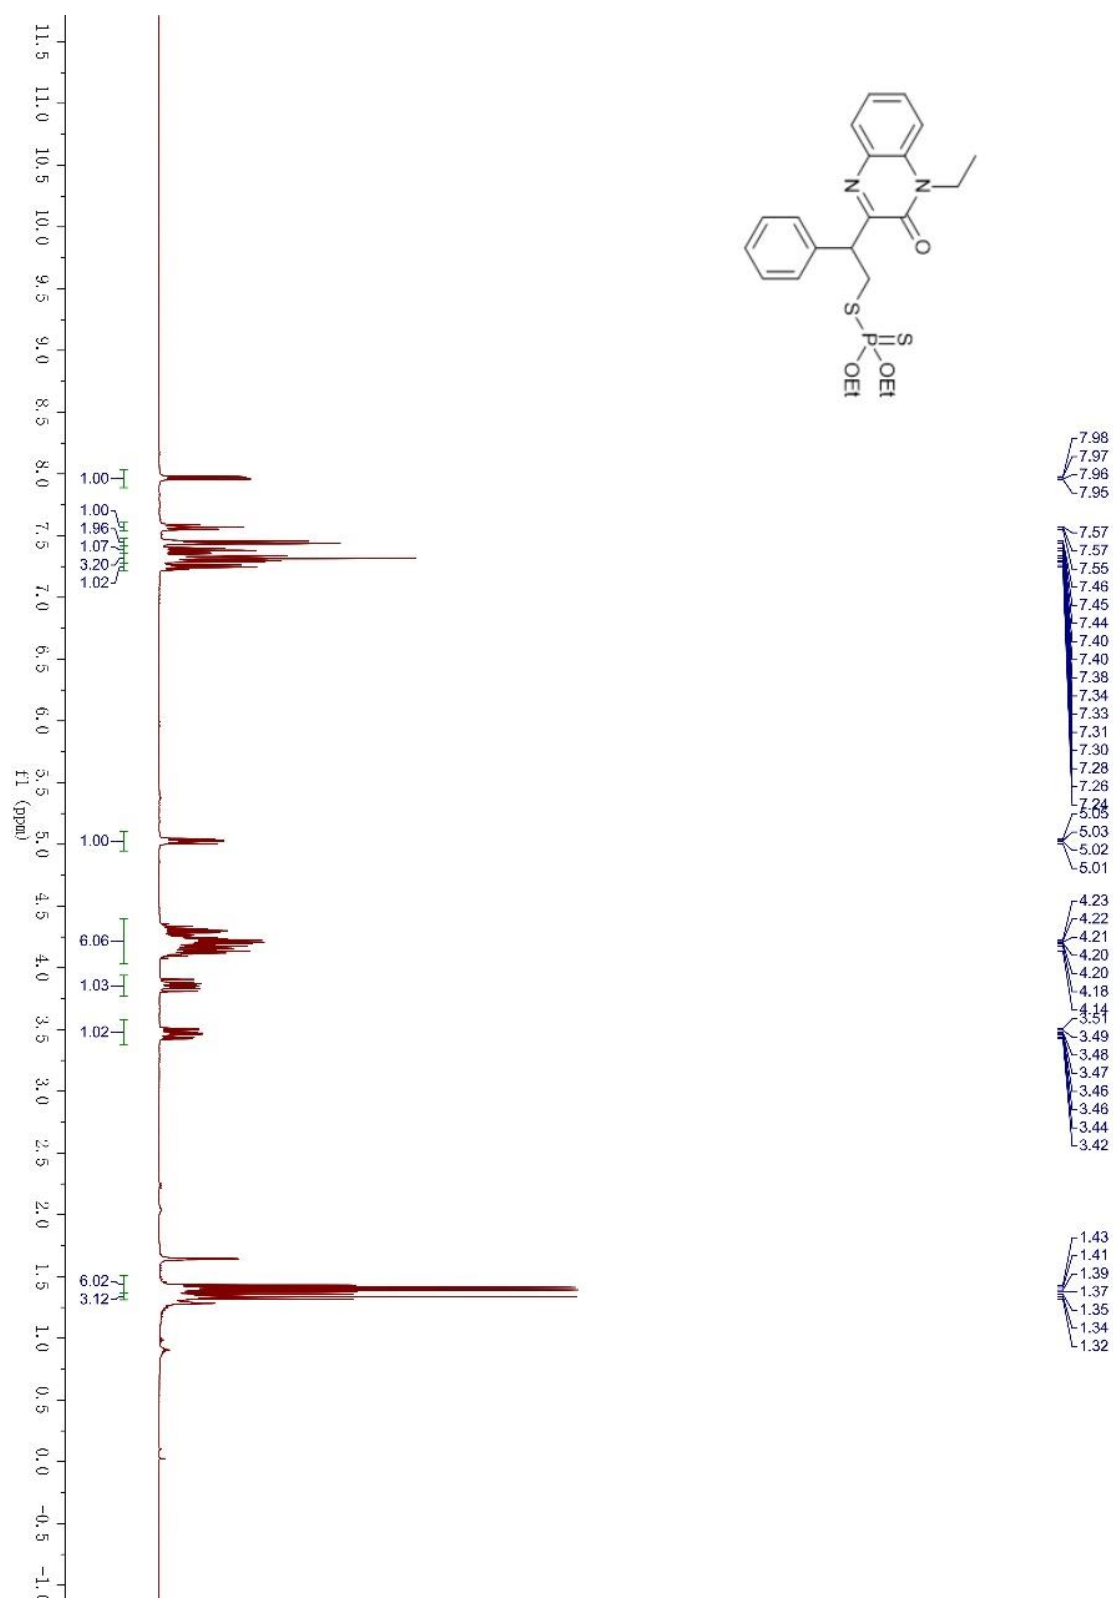

<sup>13</sup>C NMR of 5

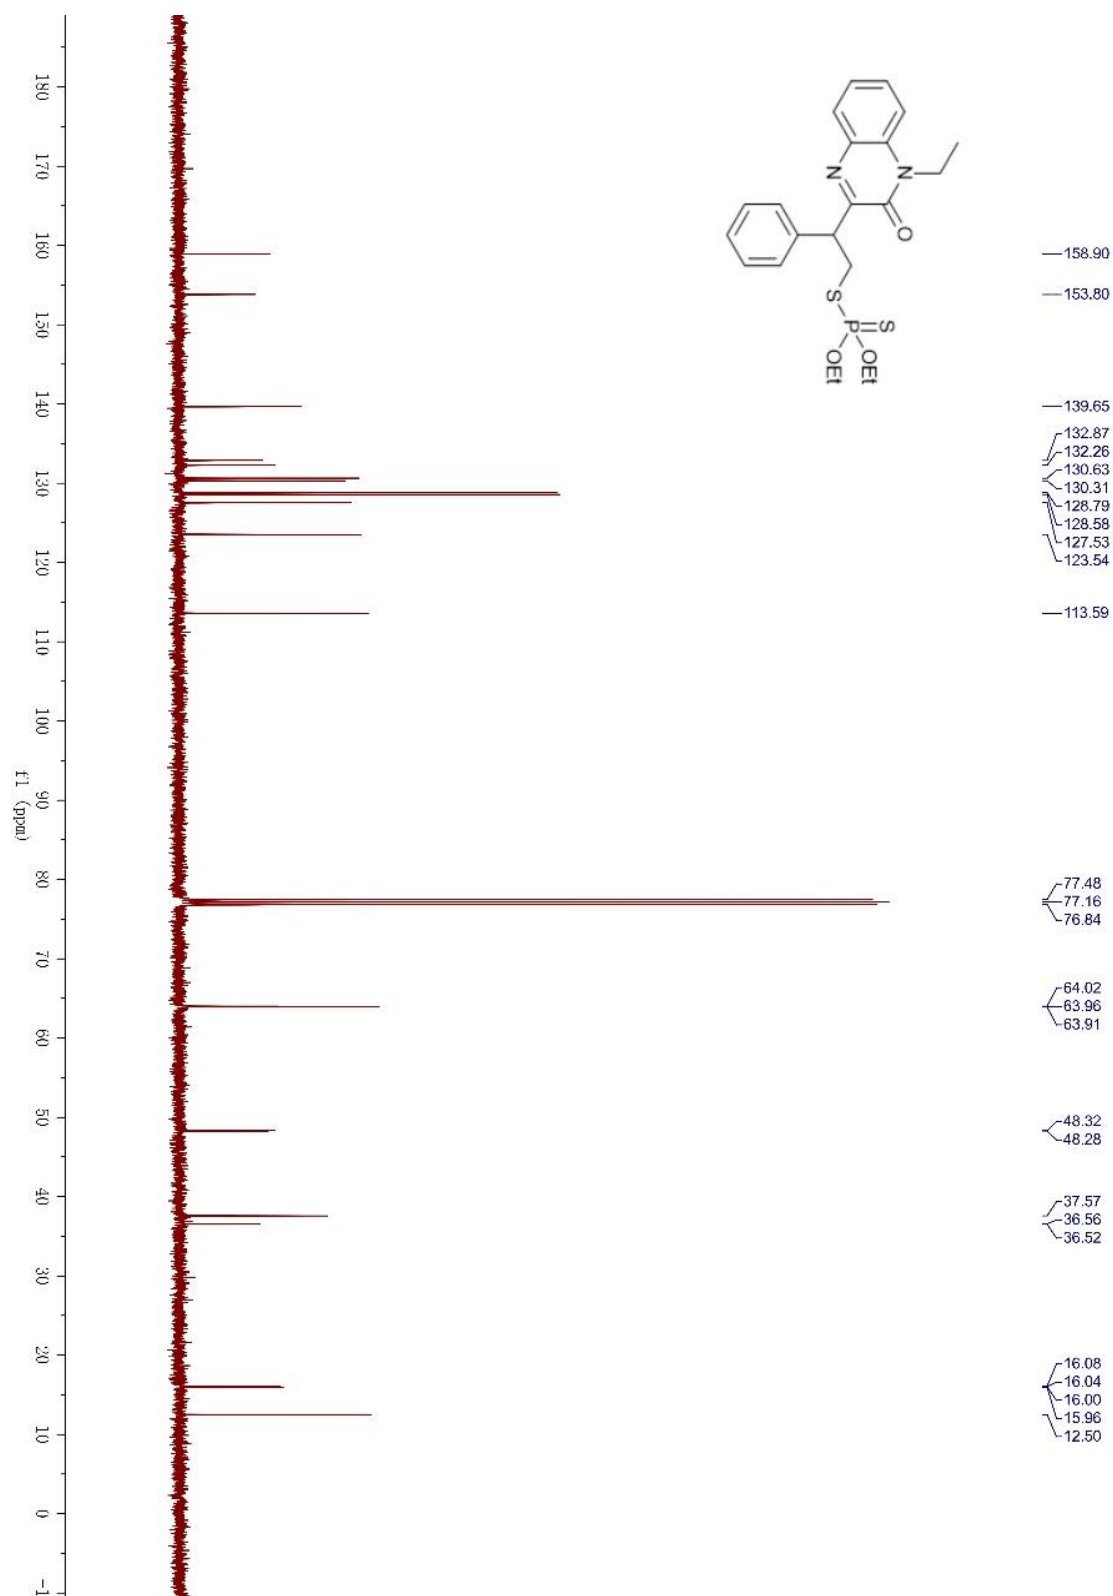

# $^1\text{H}$ NMR of 6

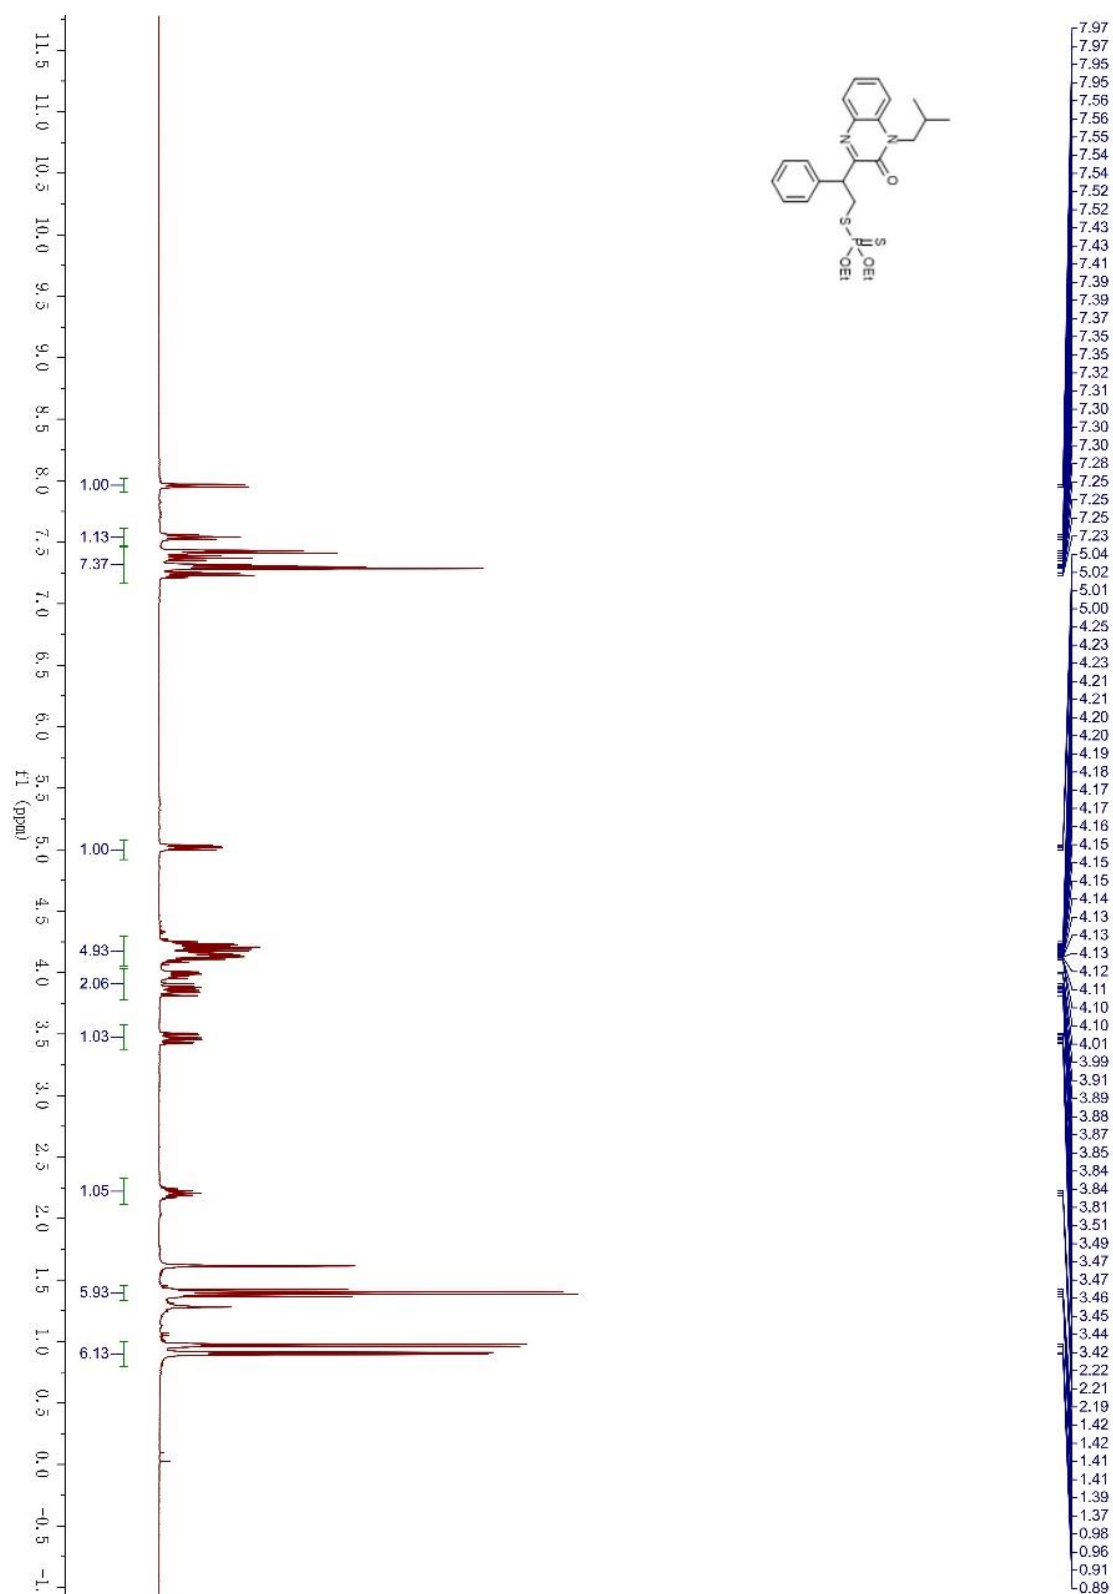

<sup>13</sup>C NMR of 6

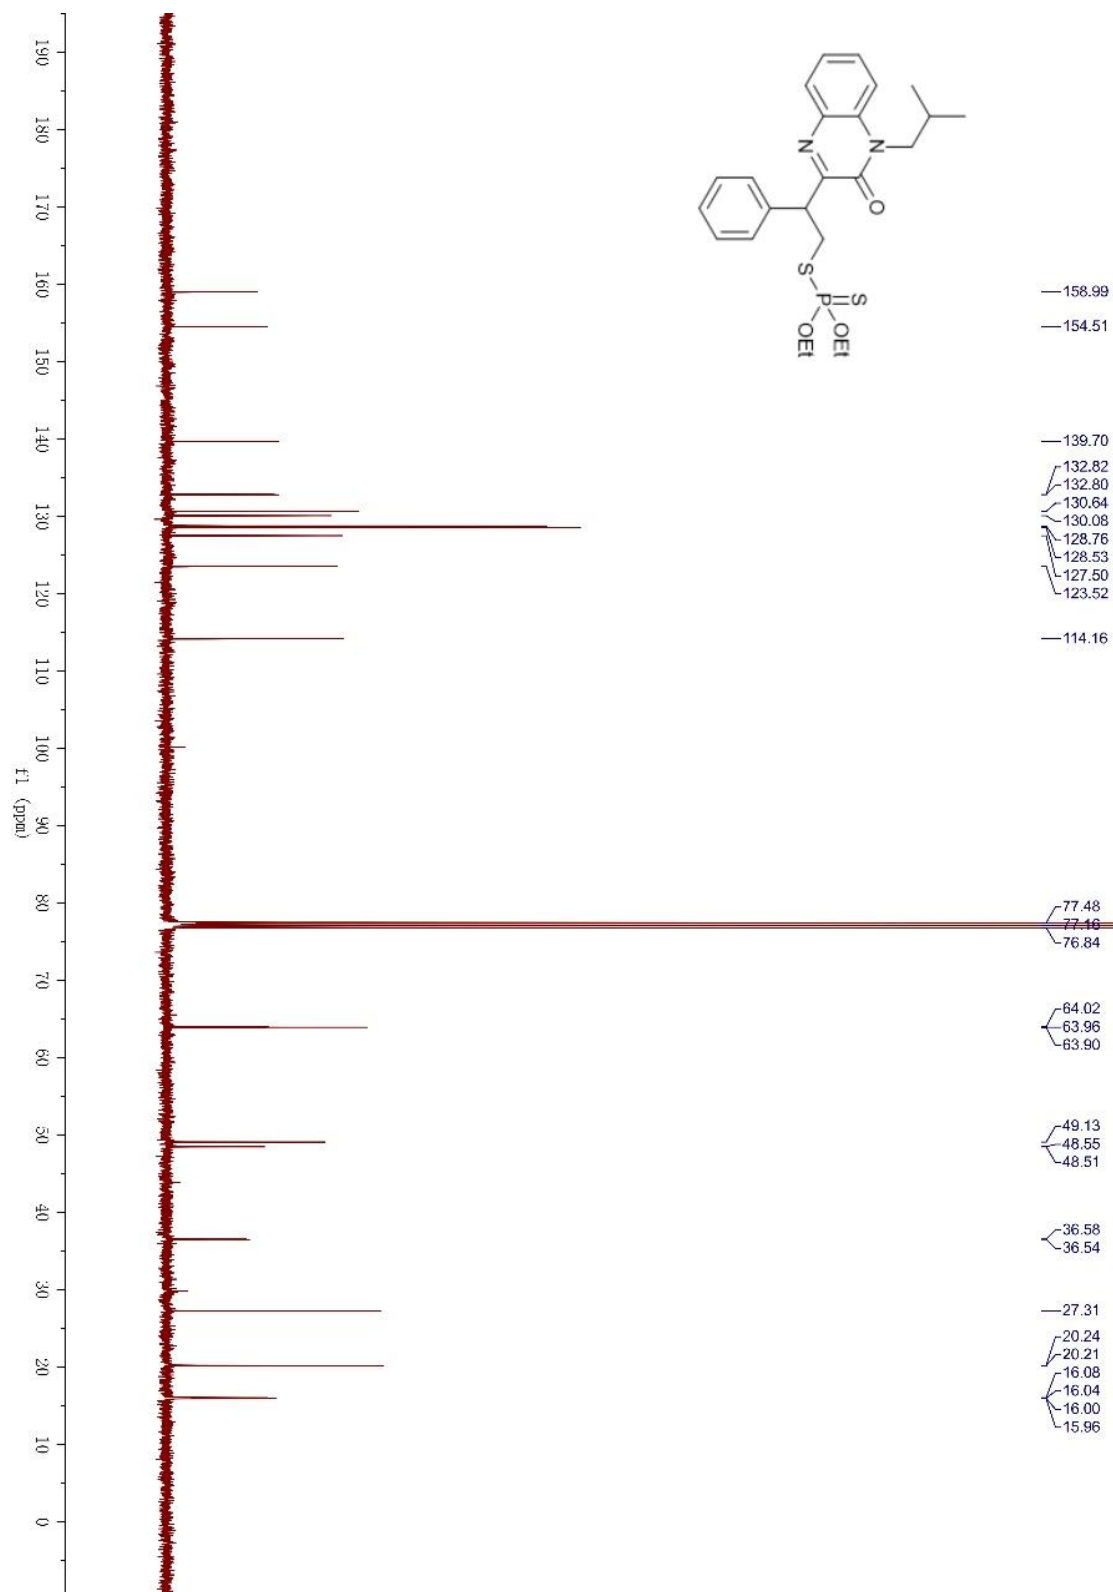



# $^1\text{H}$ NMR of 7

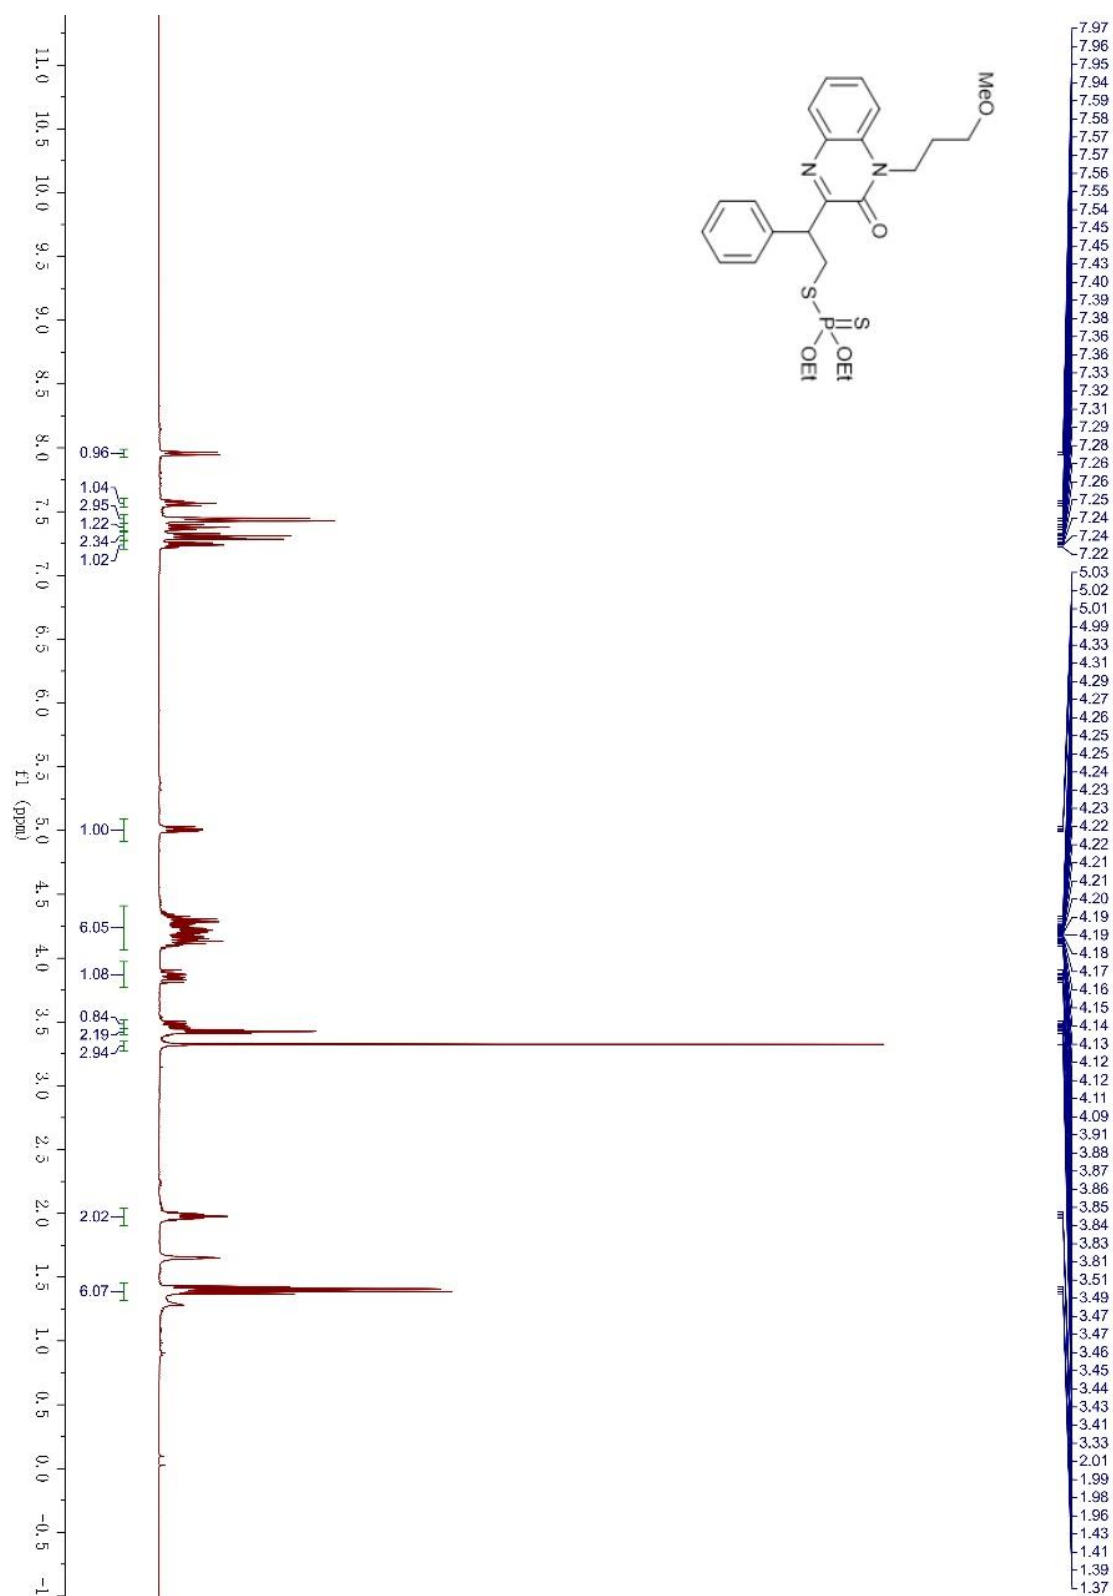

<sup>13</sup>C NMR of 7

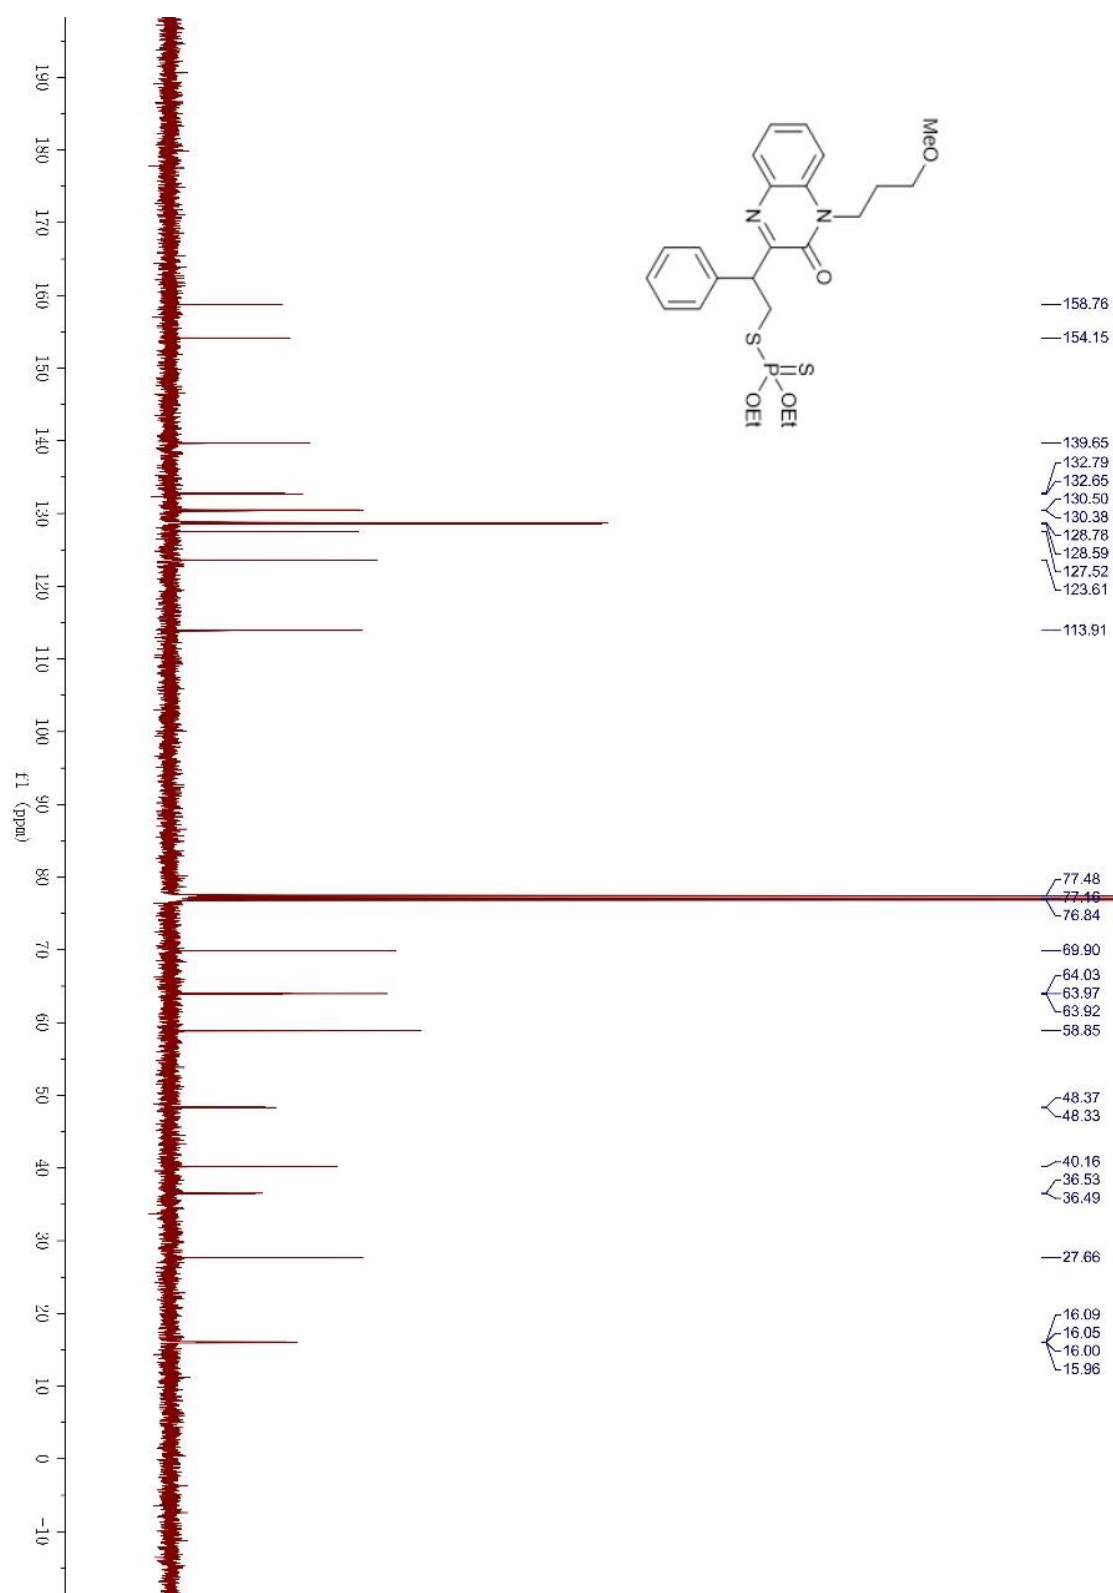

<sup>1</sup>H NMR of 8

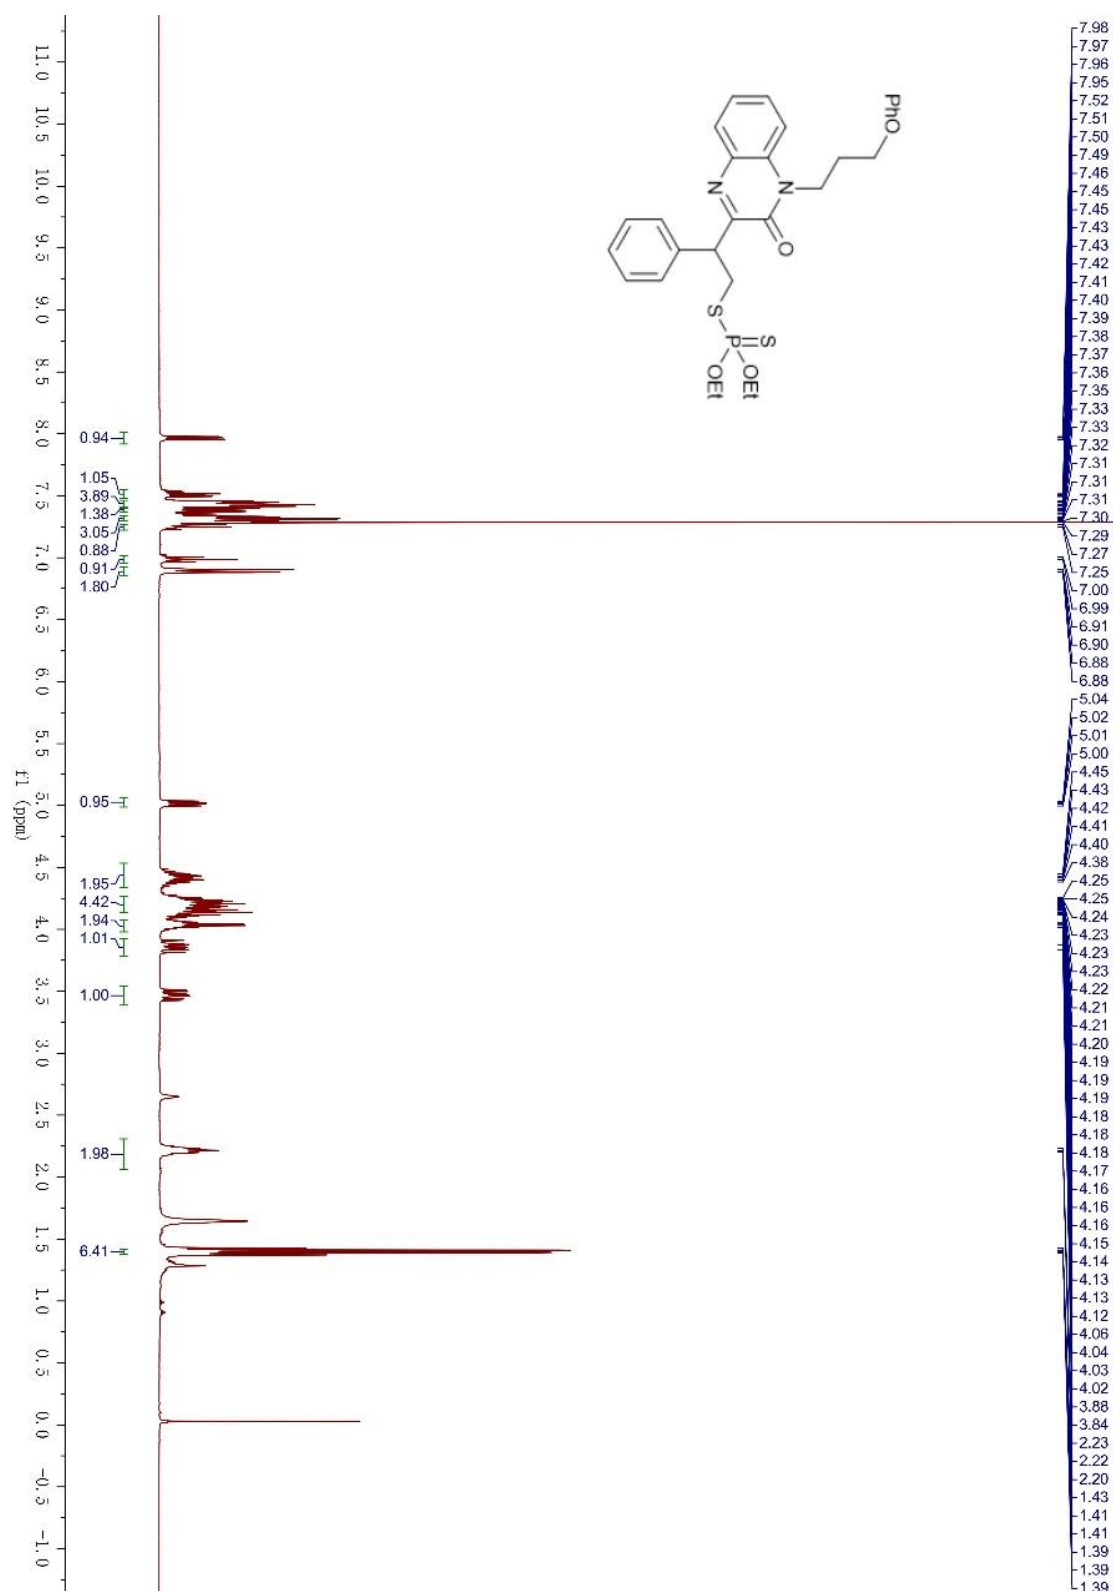

<sup>13</sup>C NMR of **8**

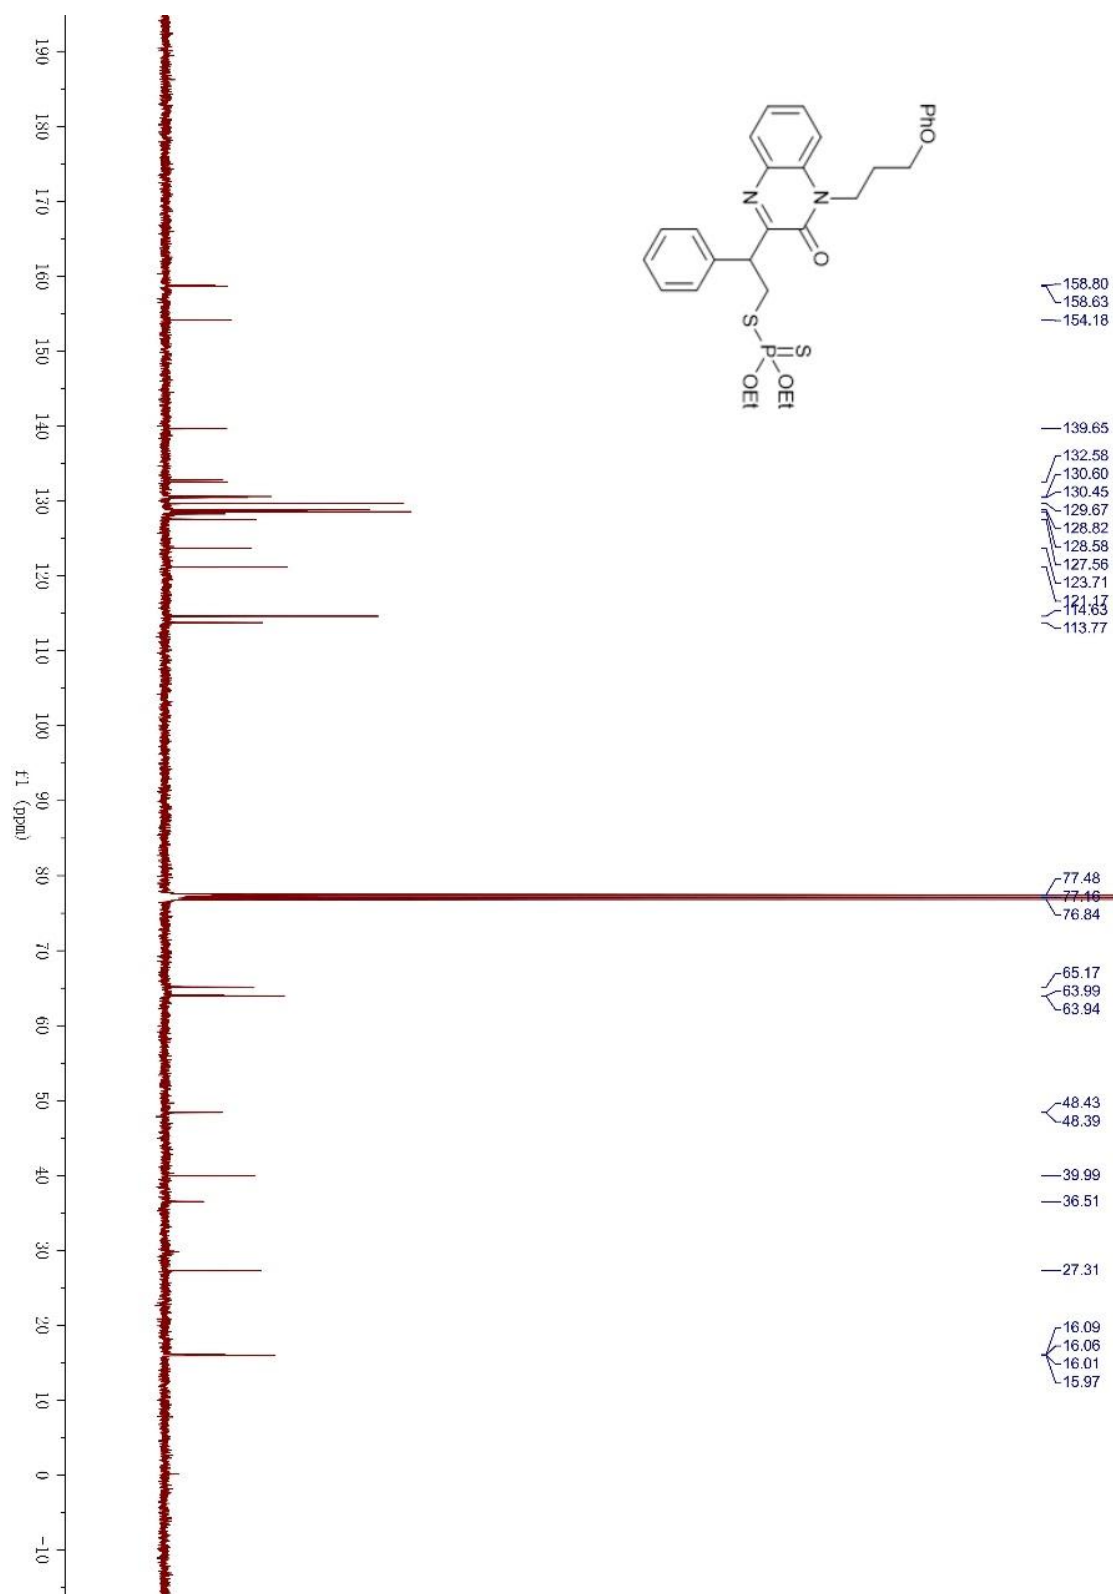

<sup>1</sup>H NMR of 9

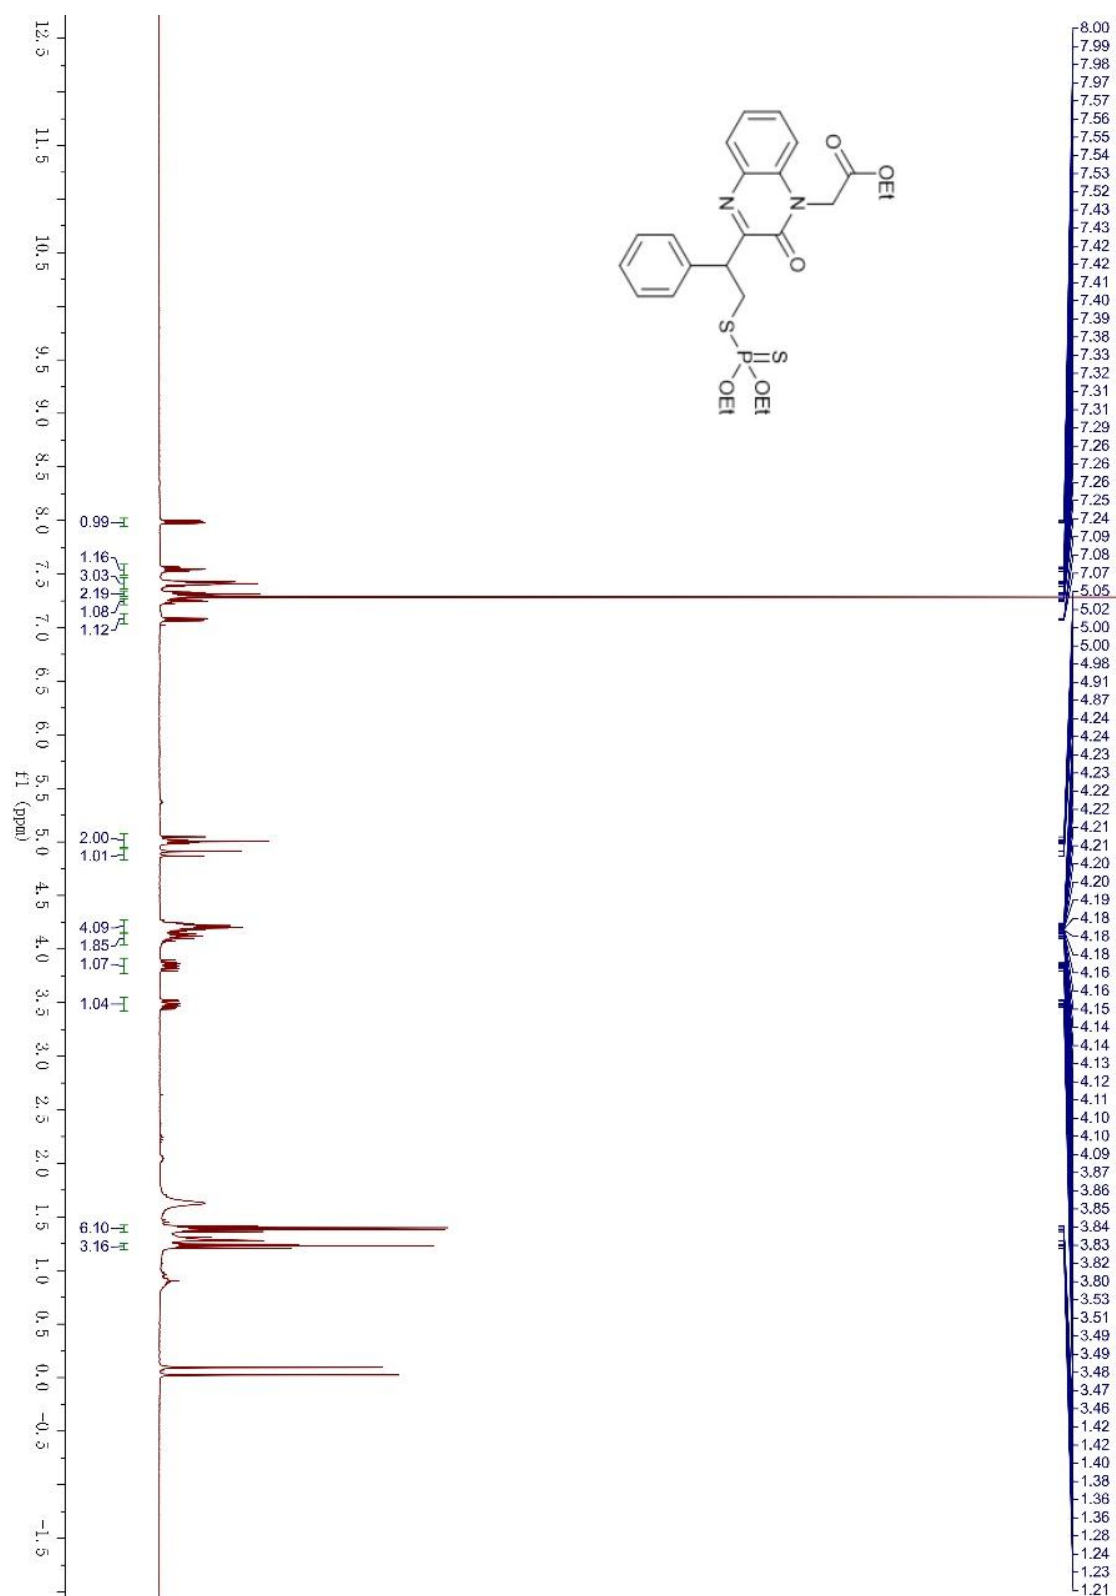

<sup>13</sup>C NMR of 9

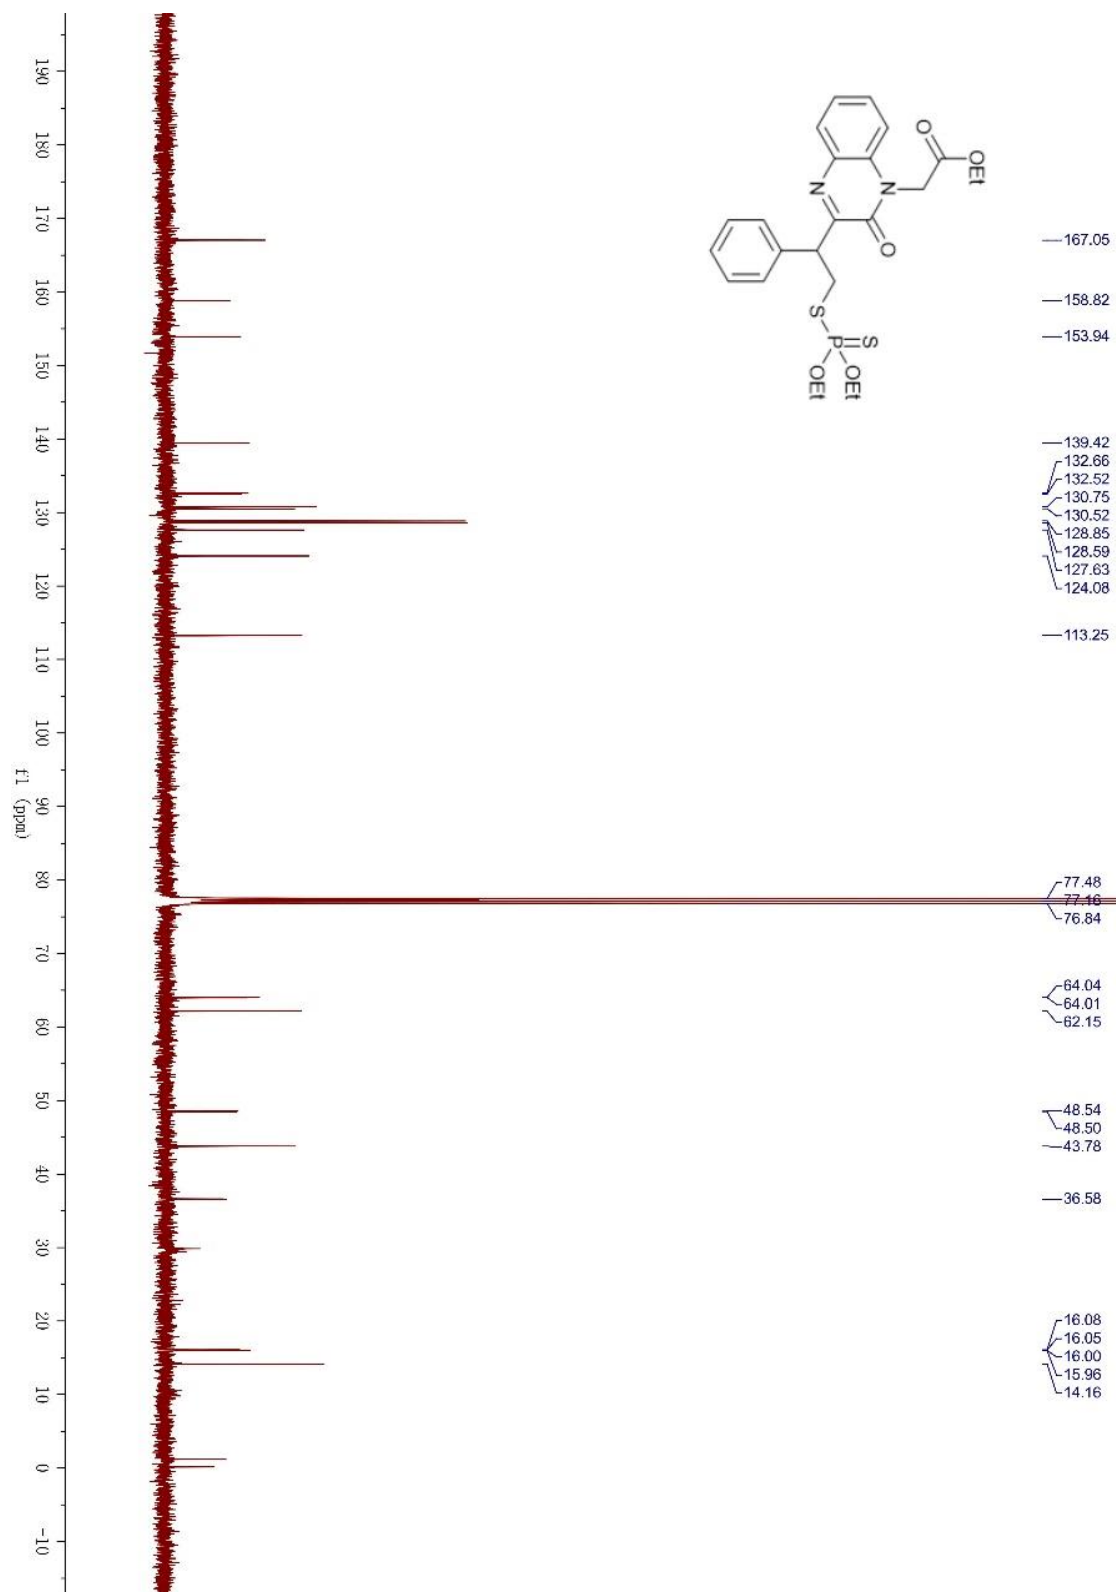

# <sup>1</sup>H NMR of 10

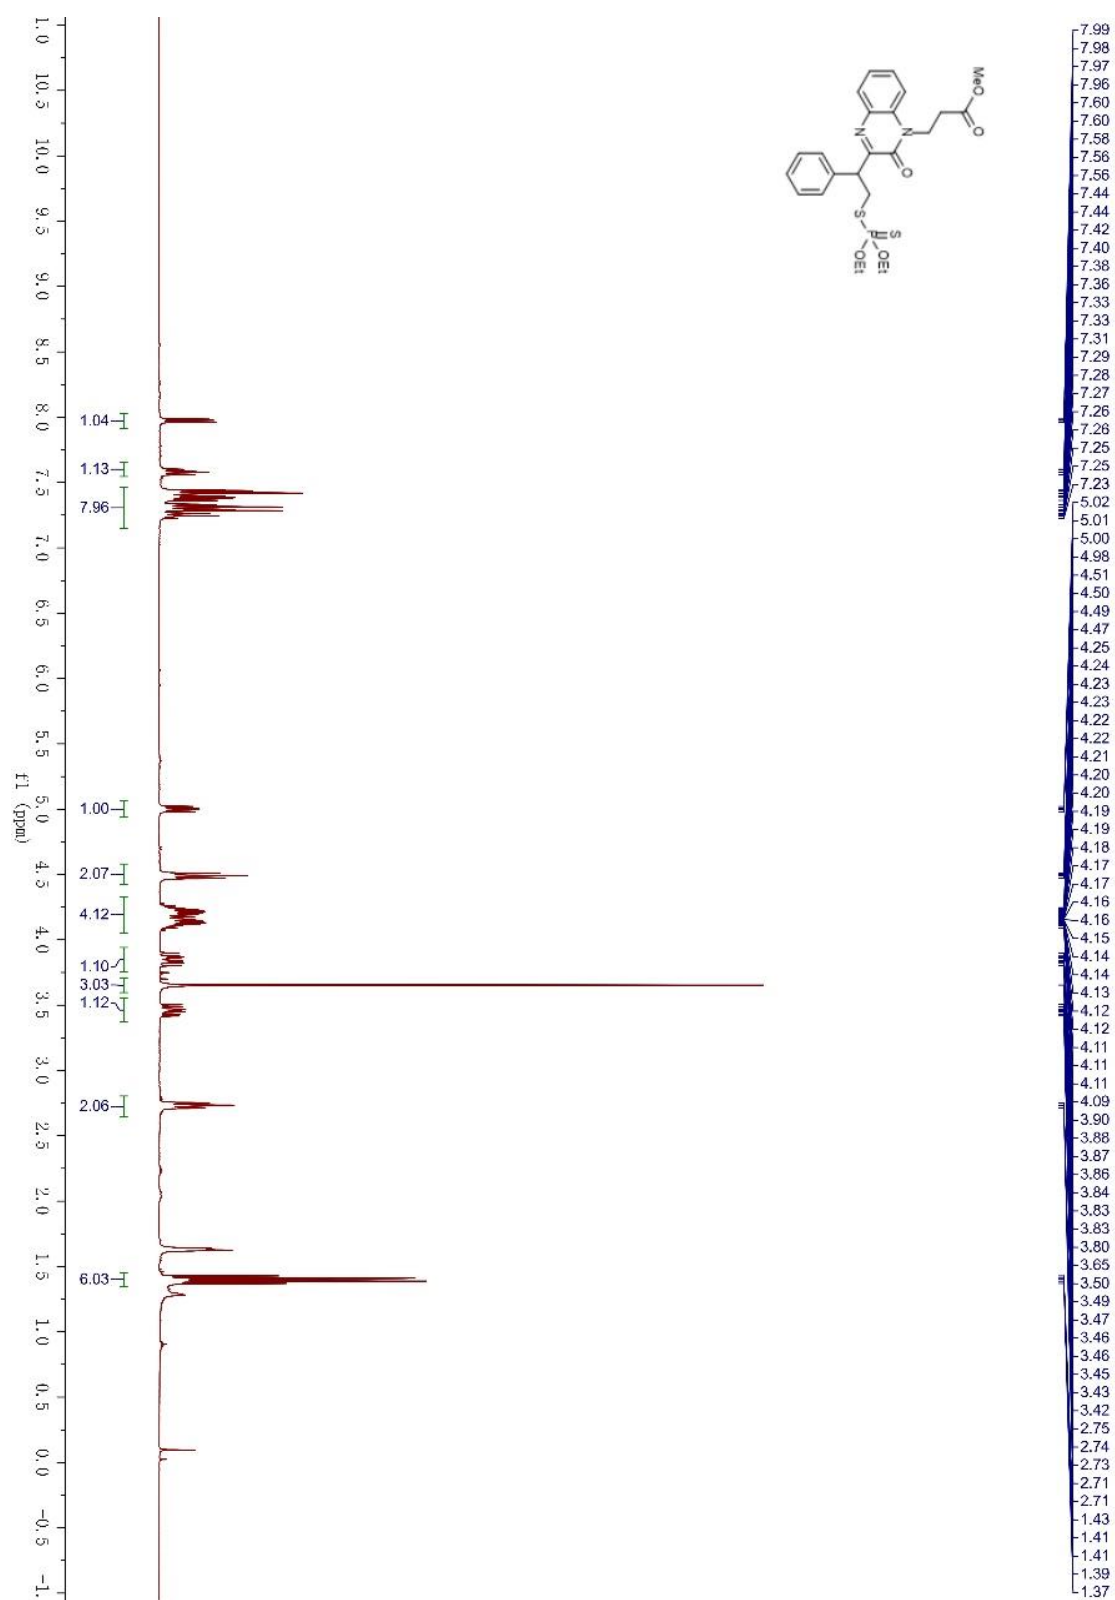

<sup>13</sup>C NMR of 10

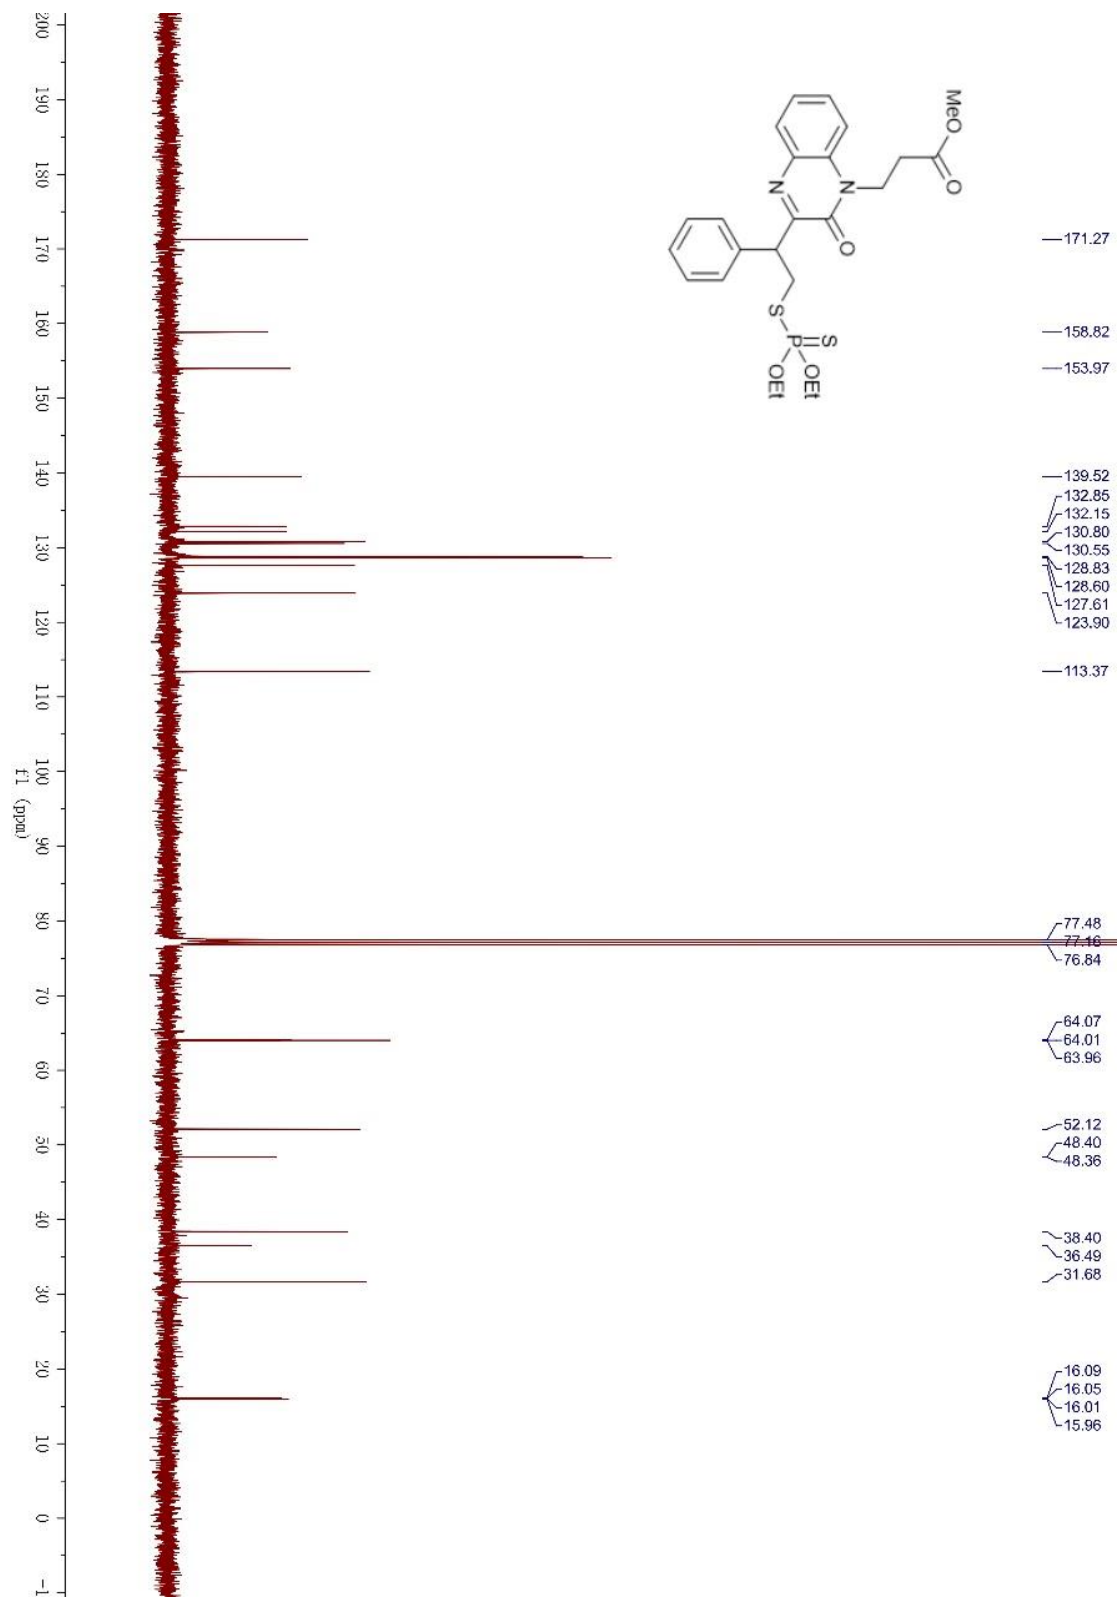



# $^1\text{H}$ NMR of 11

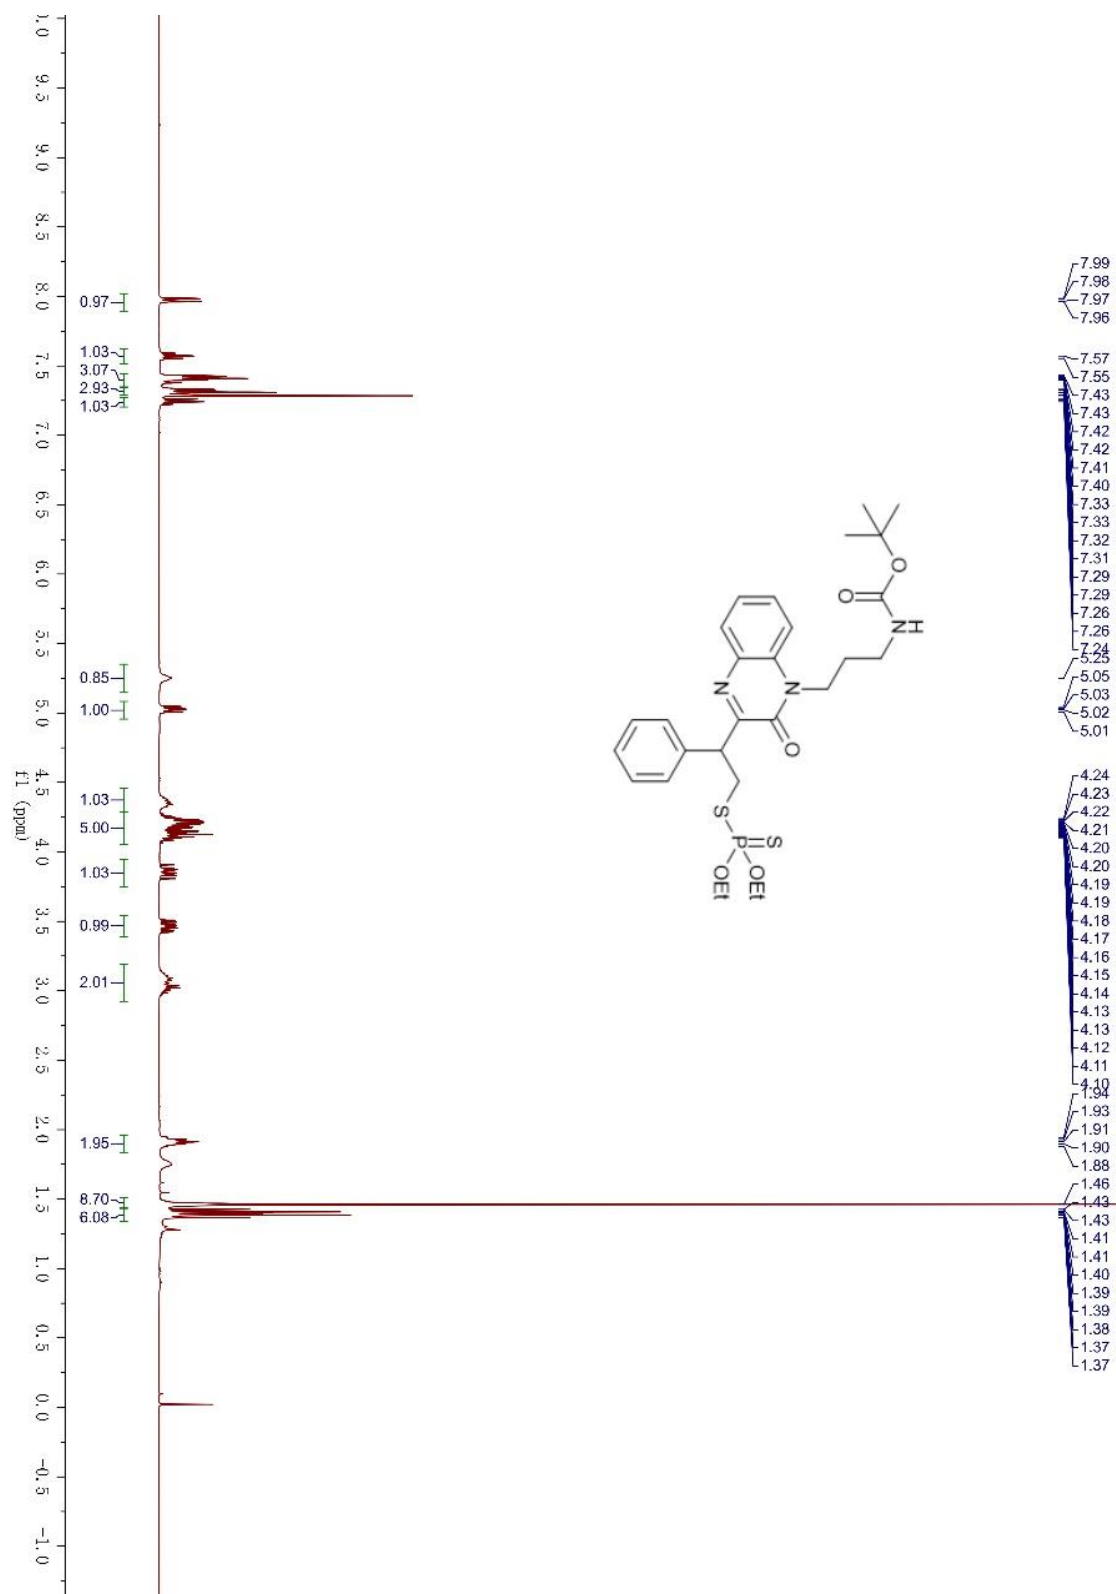

<sup>13</sup>C NMR of **11**

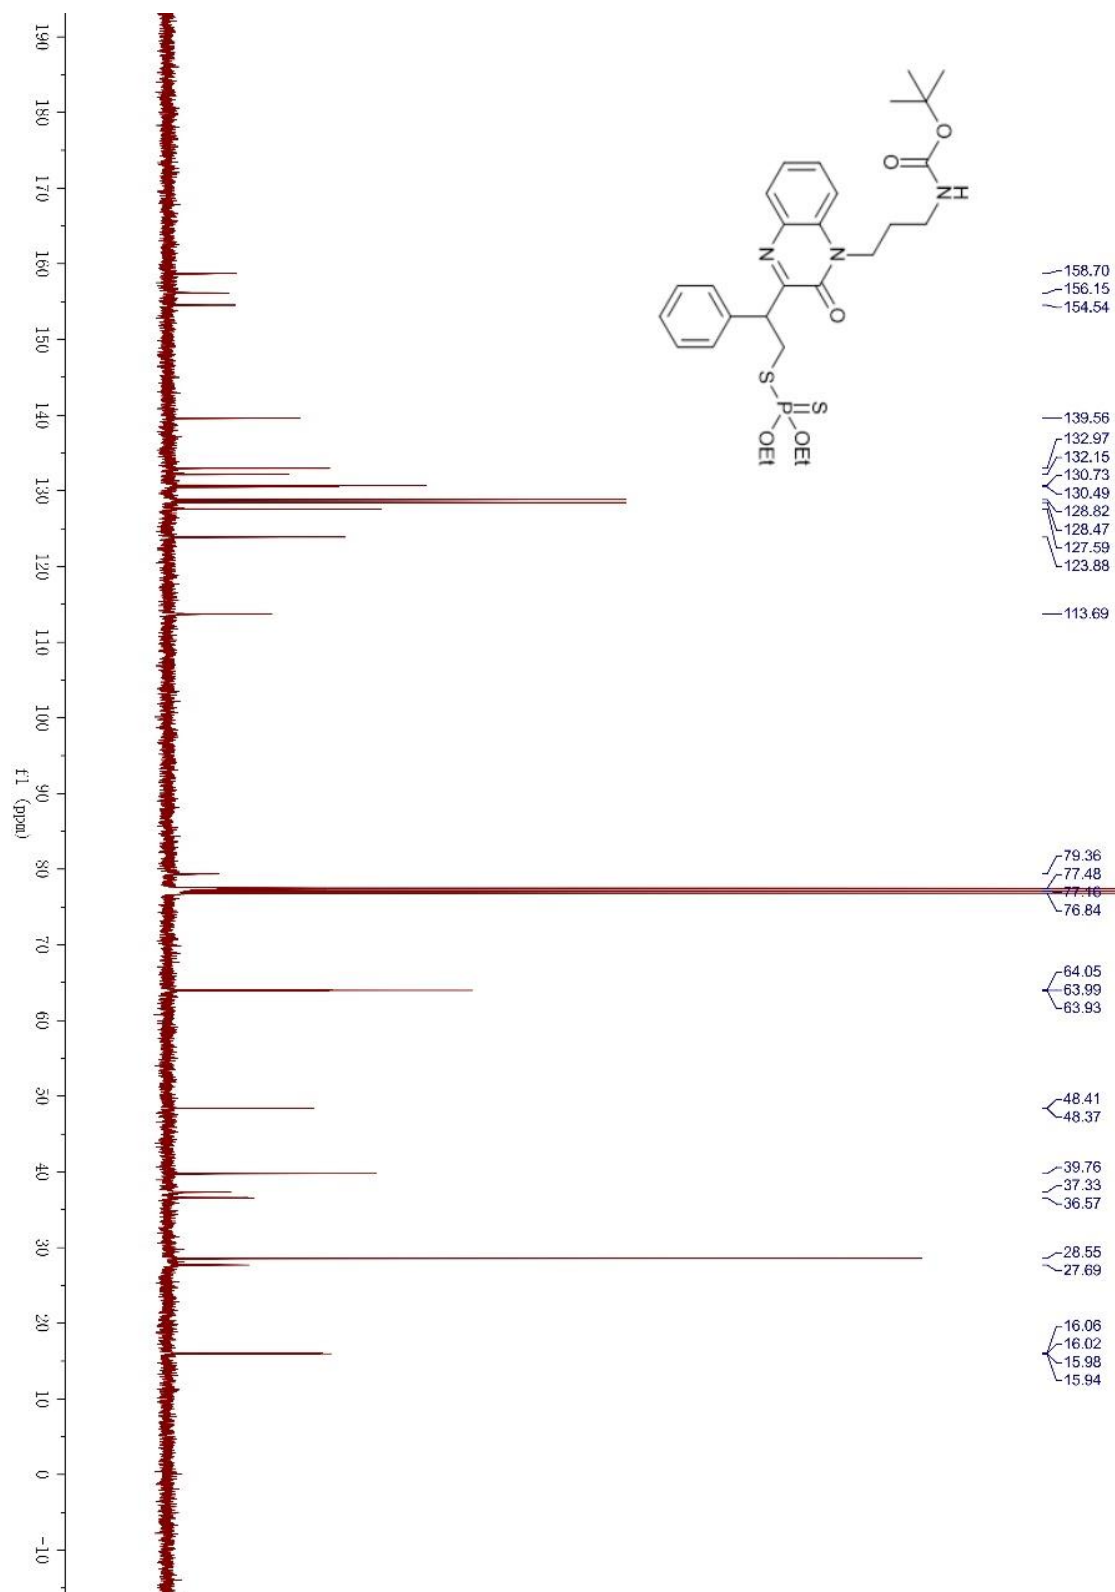

# $^1\text{H}$ NMR of 12

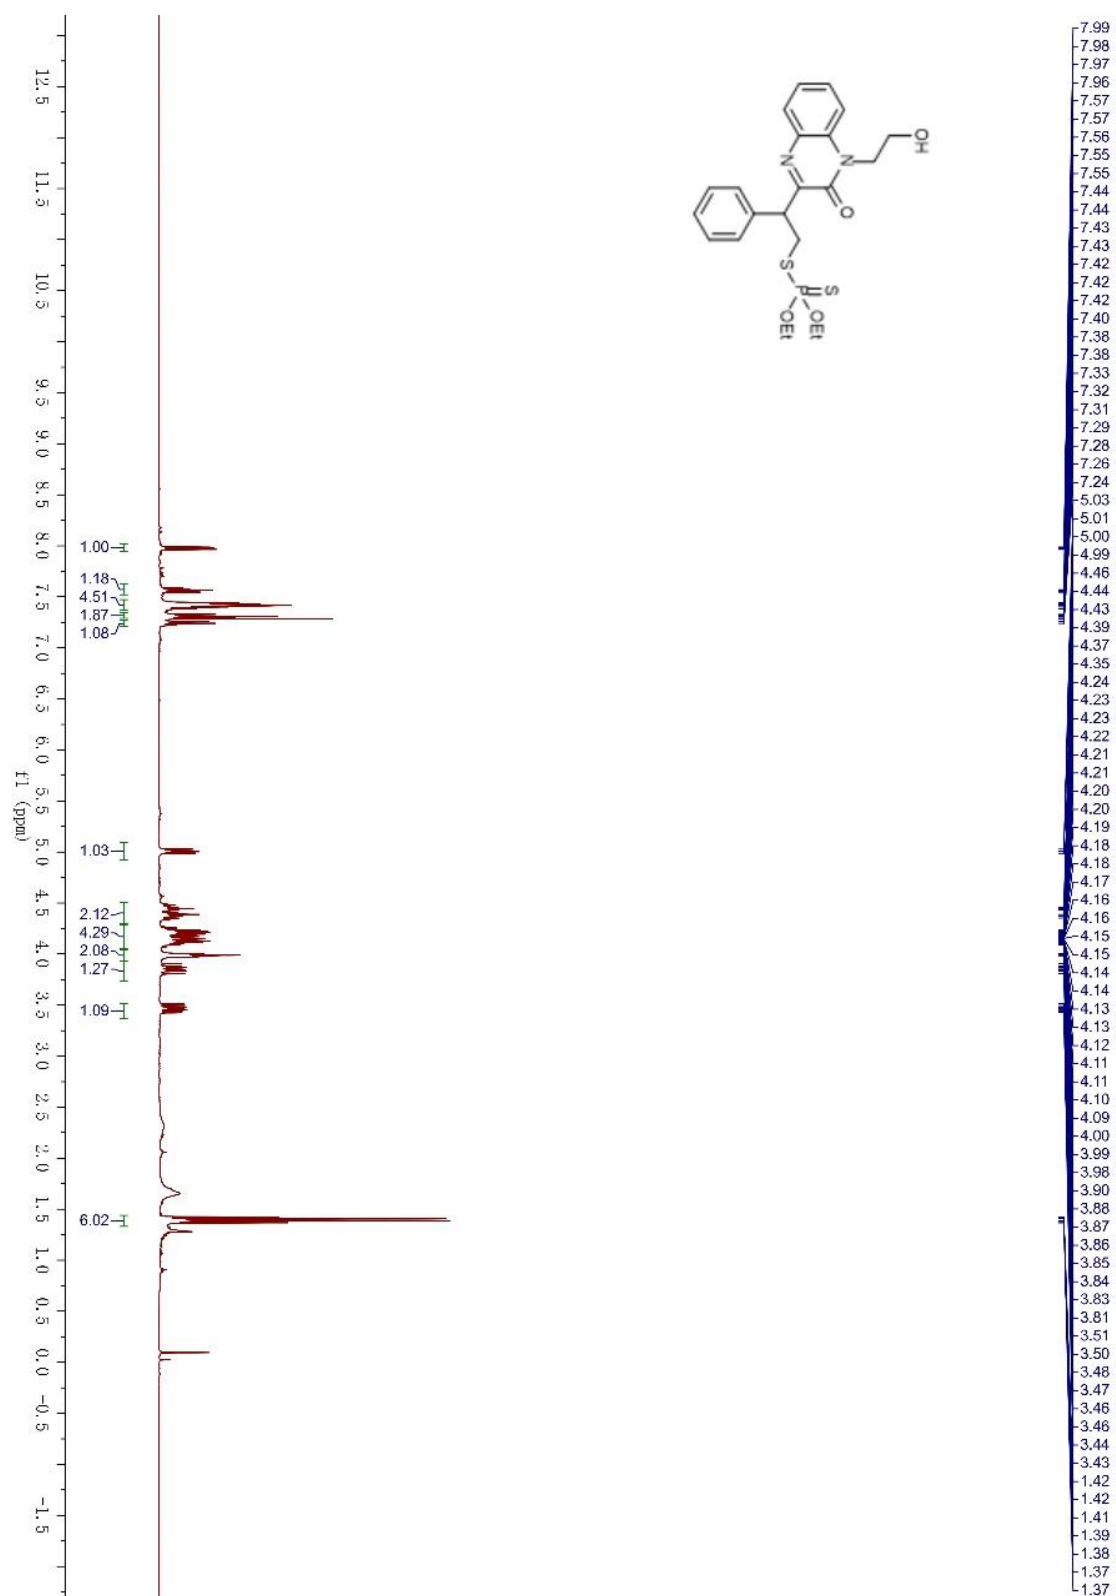

<sup>13</sup>C NMR of 12

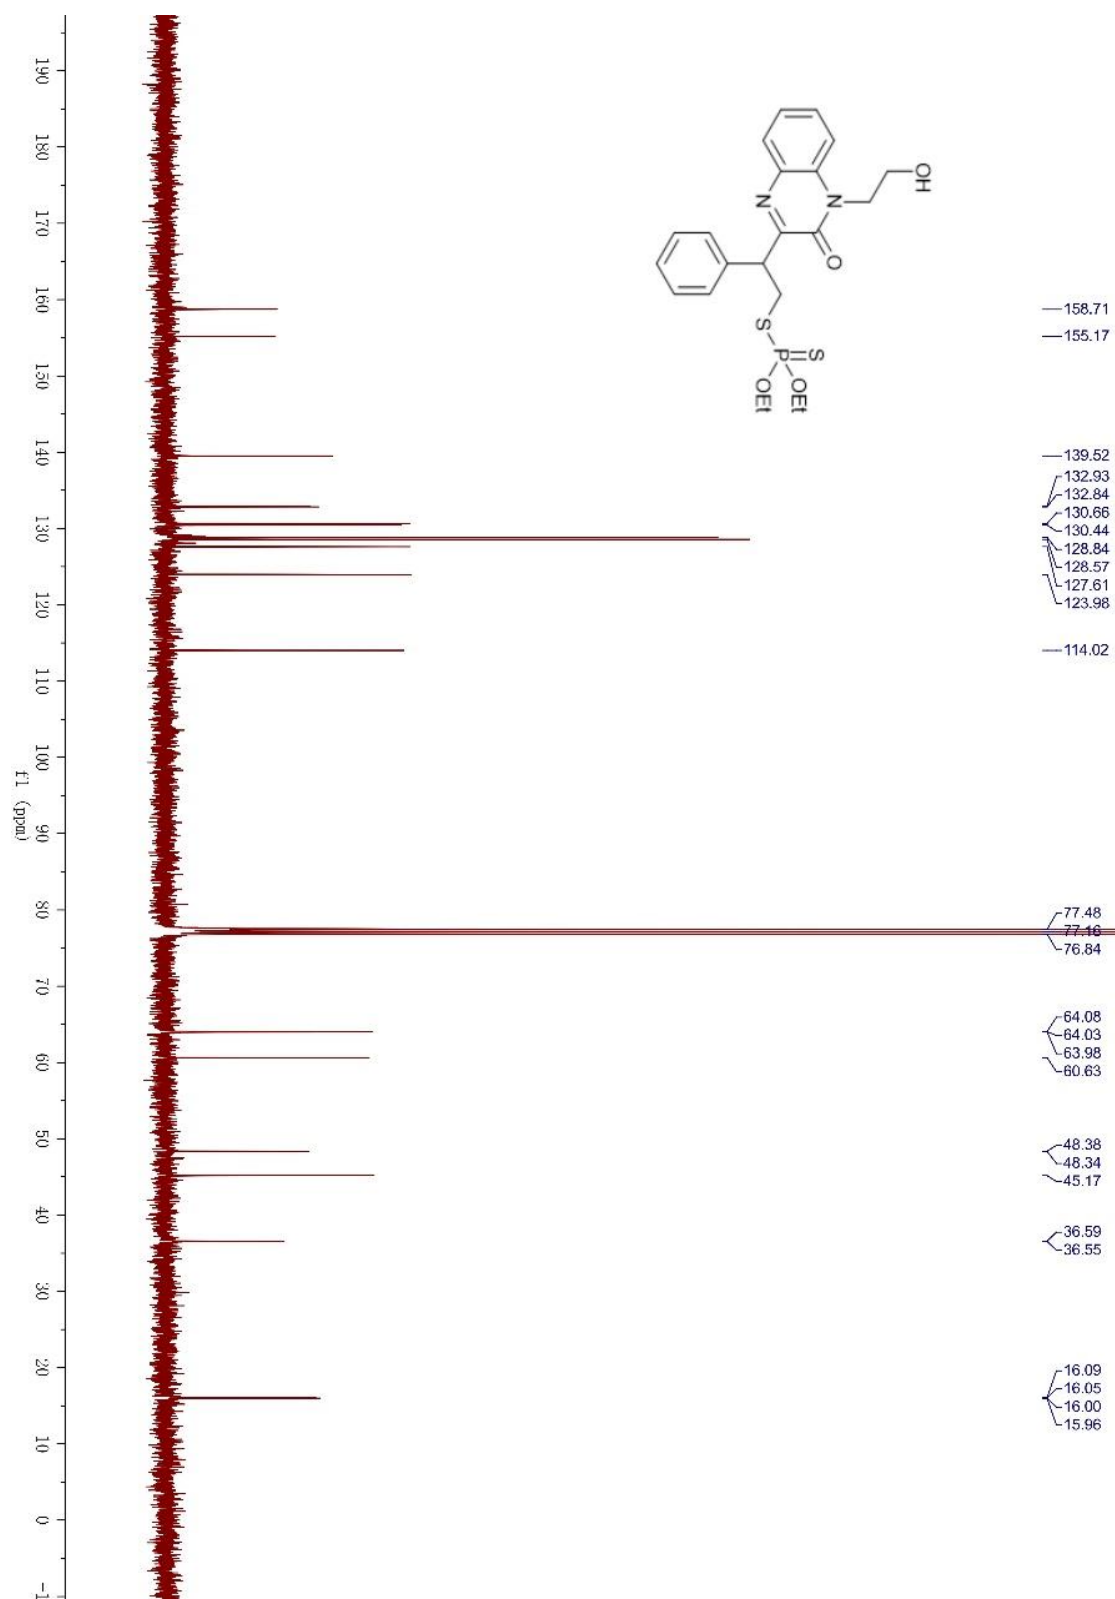

# $^1\text{H}$ NMR of 13

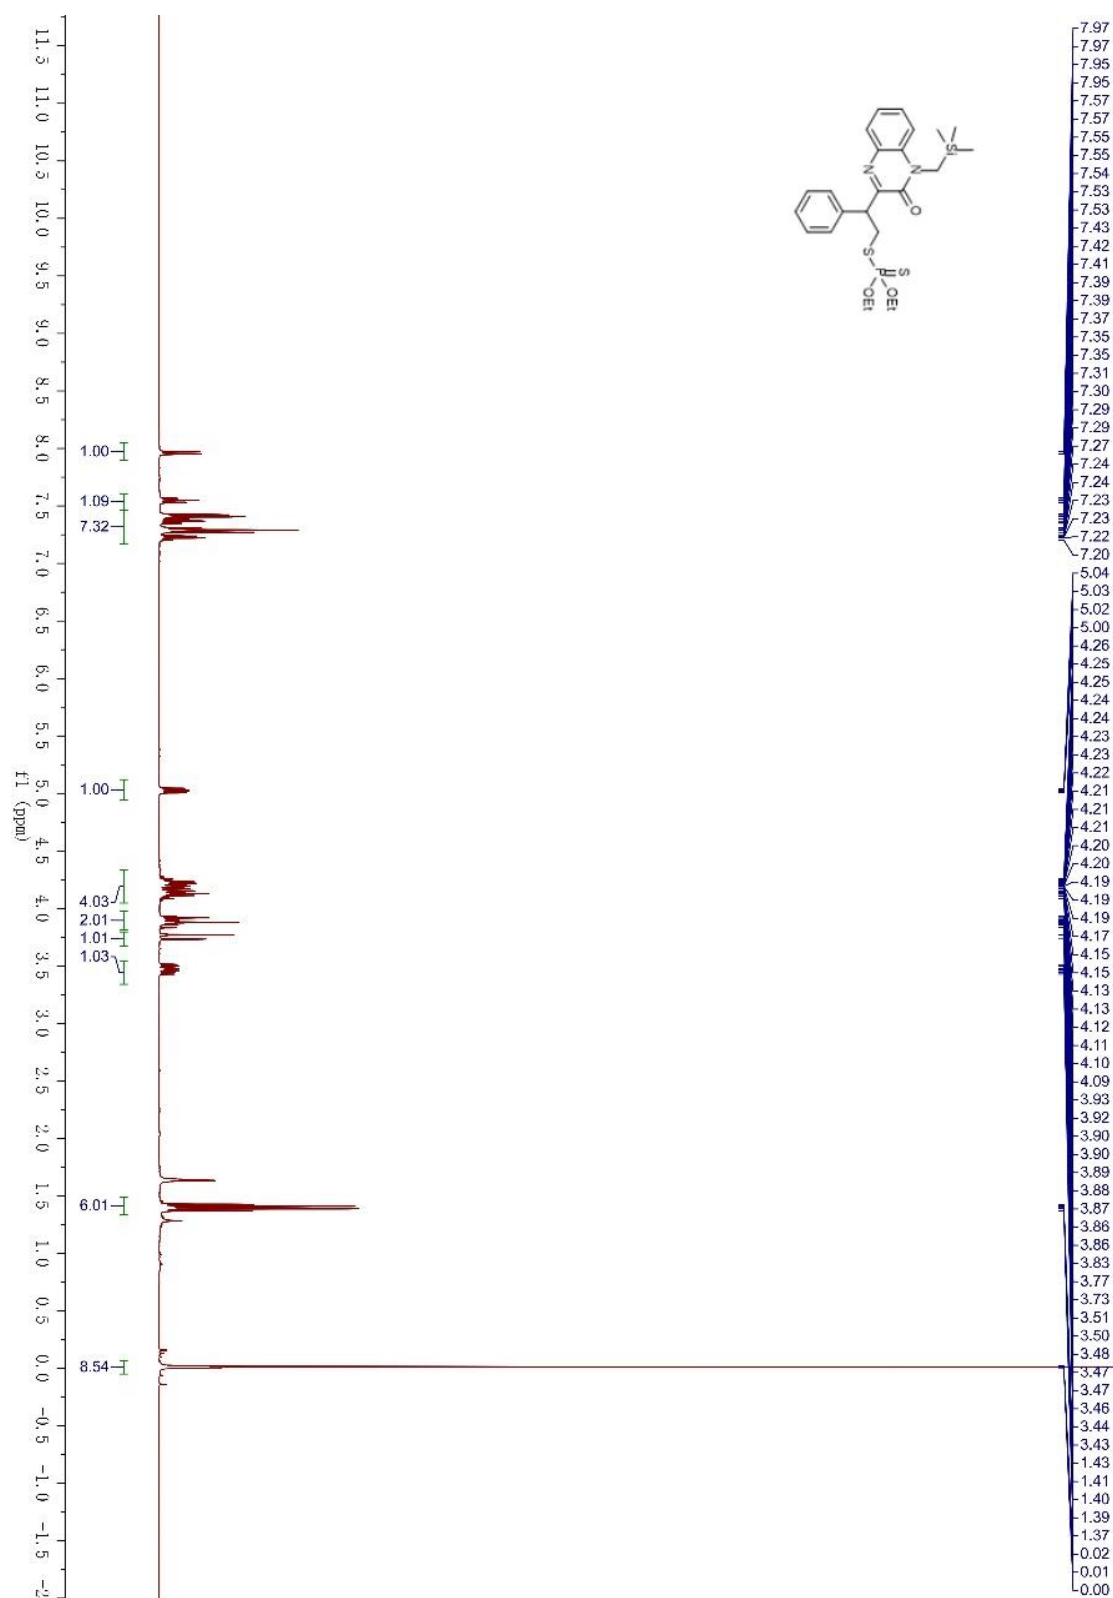

<sup>13</sup>C NMR of 13

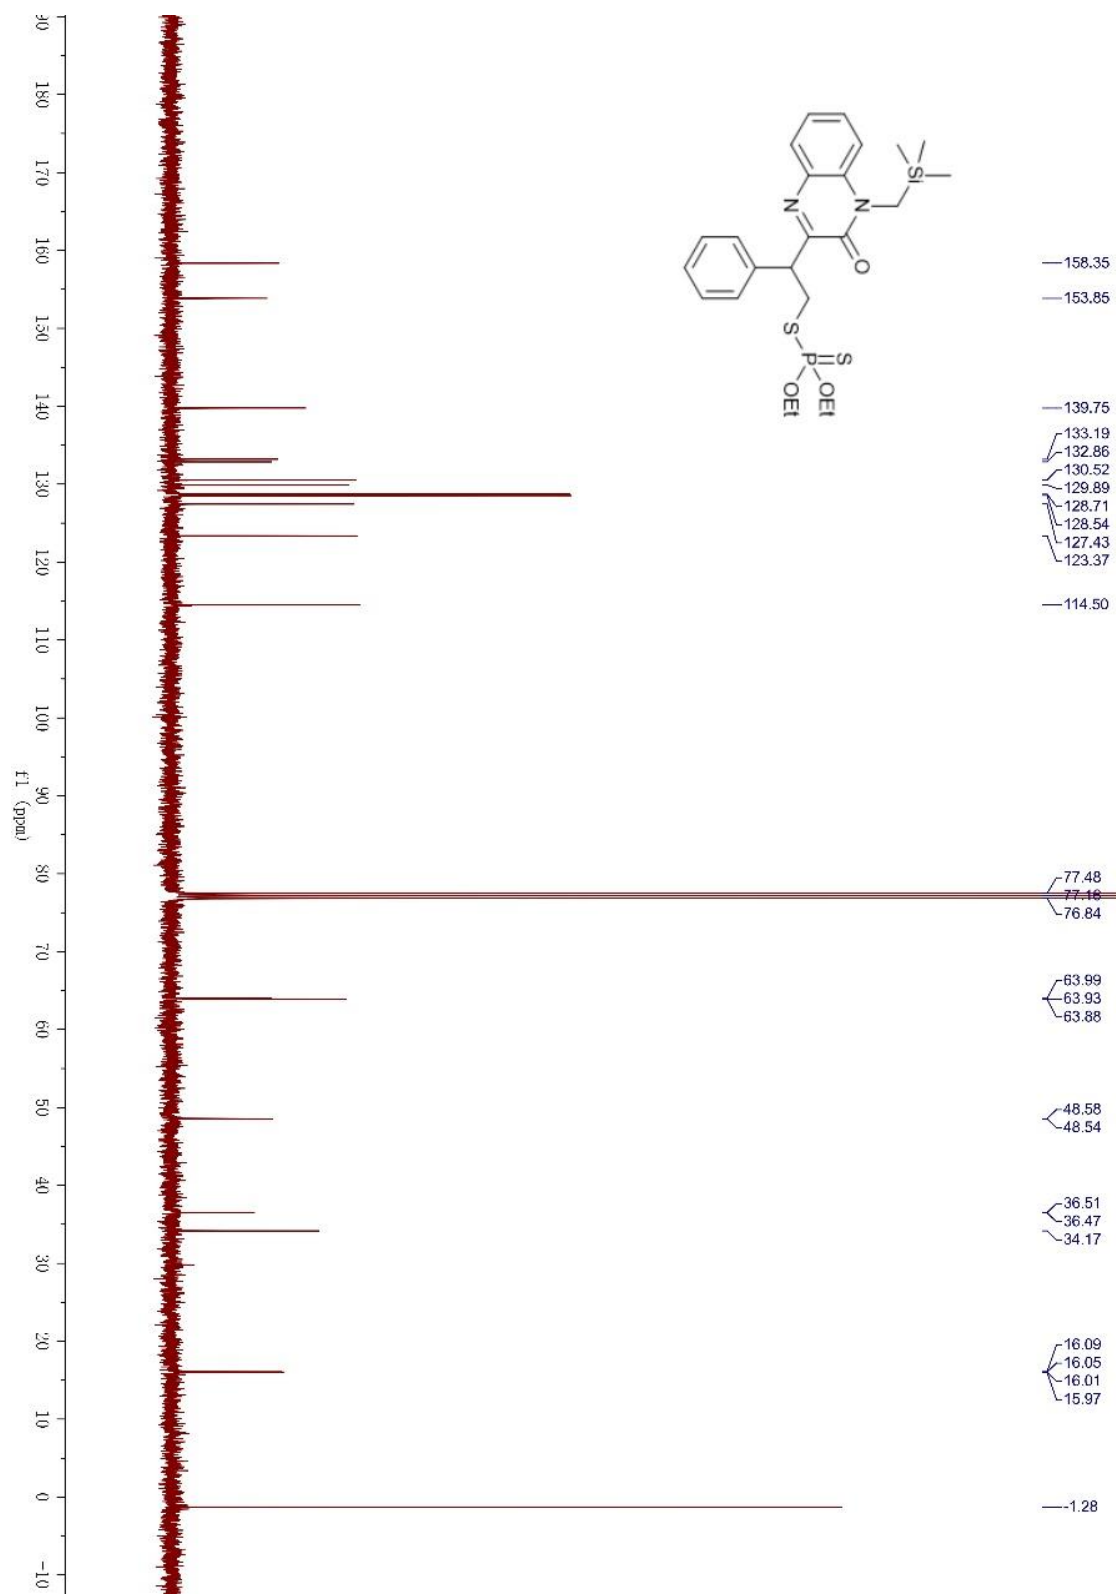

<sup>1</sup>H NMR of 14

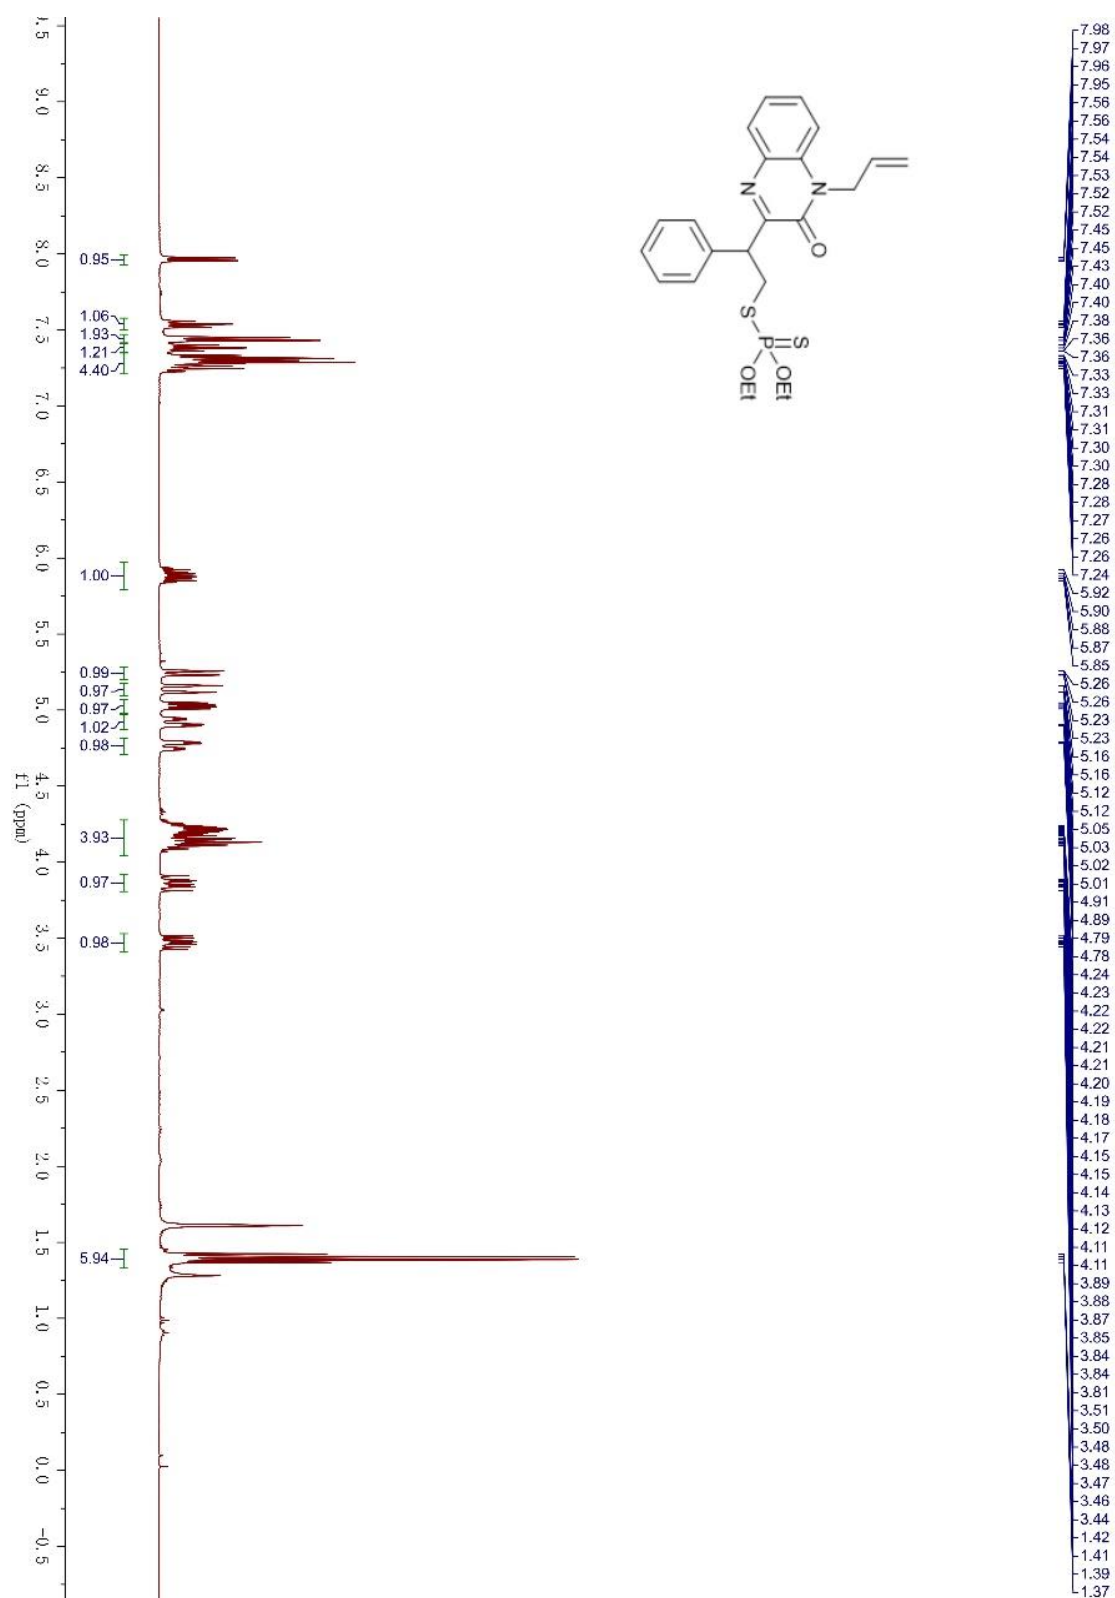

<sup>13</sup>C NMR of 14

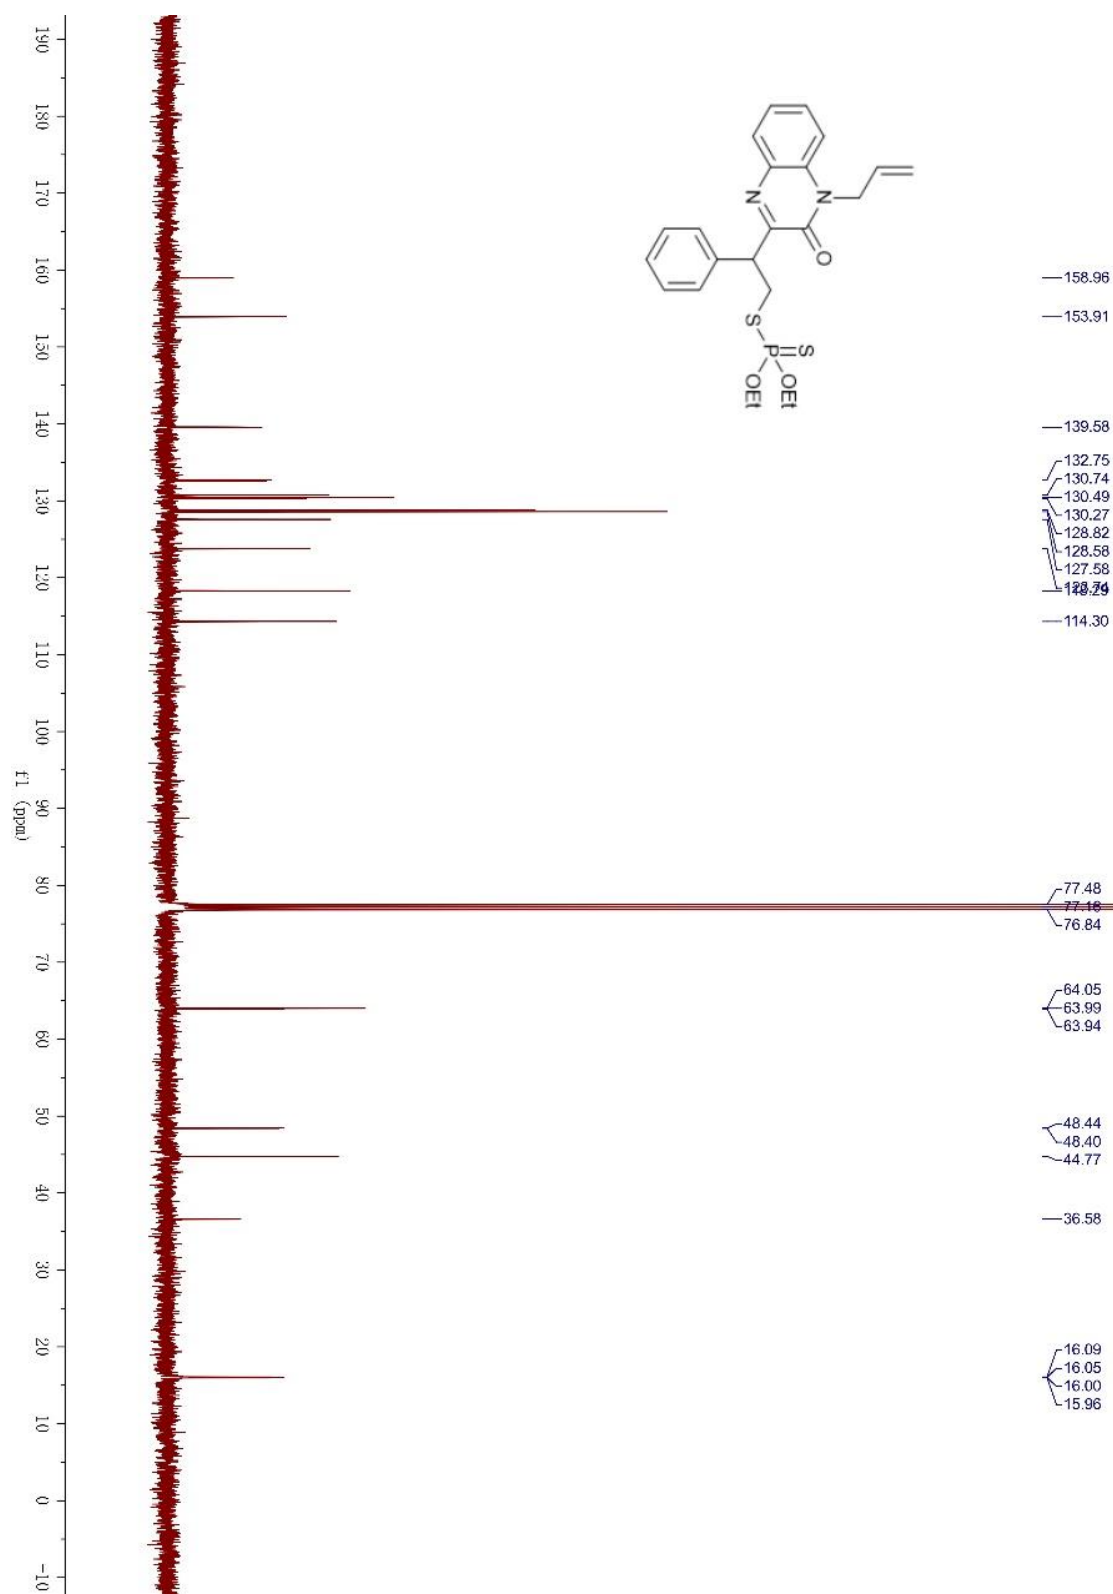



$^1\text{H}$  NMR of 15

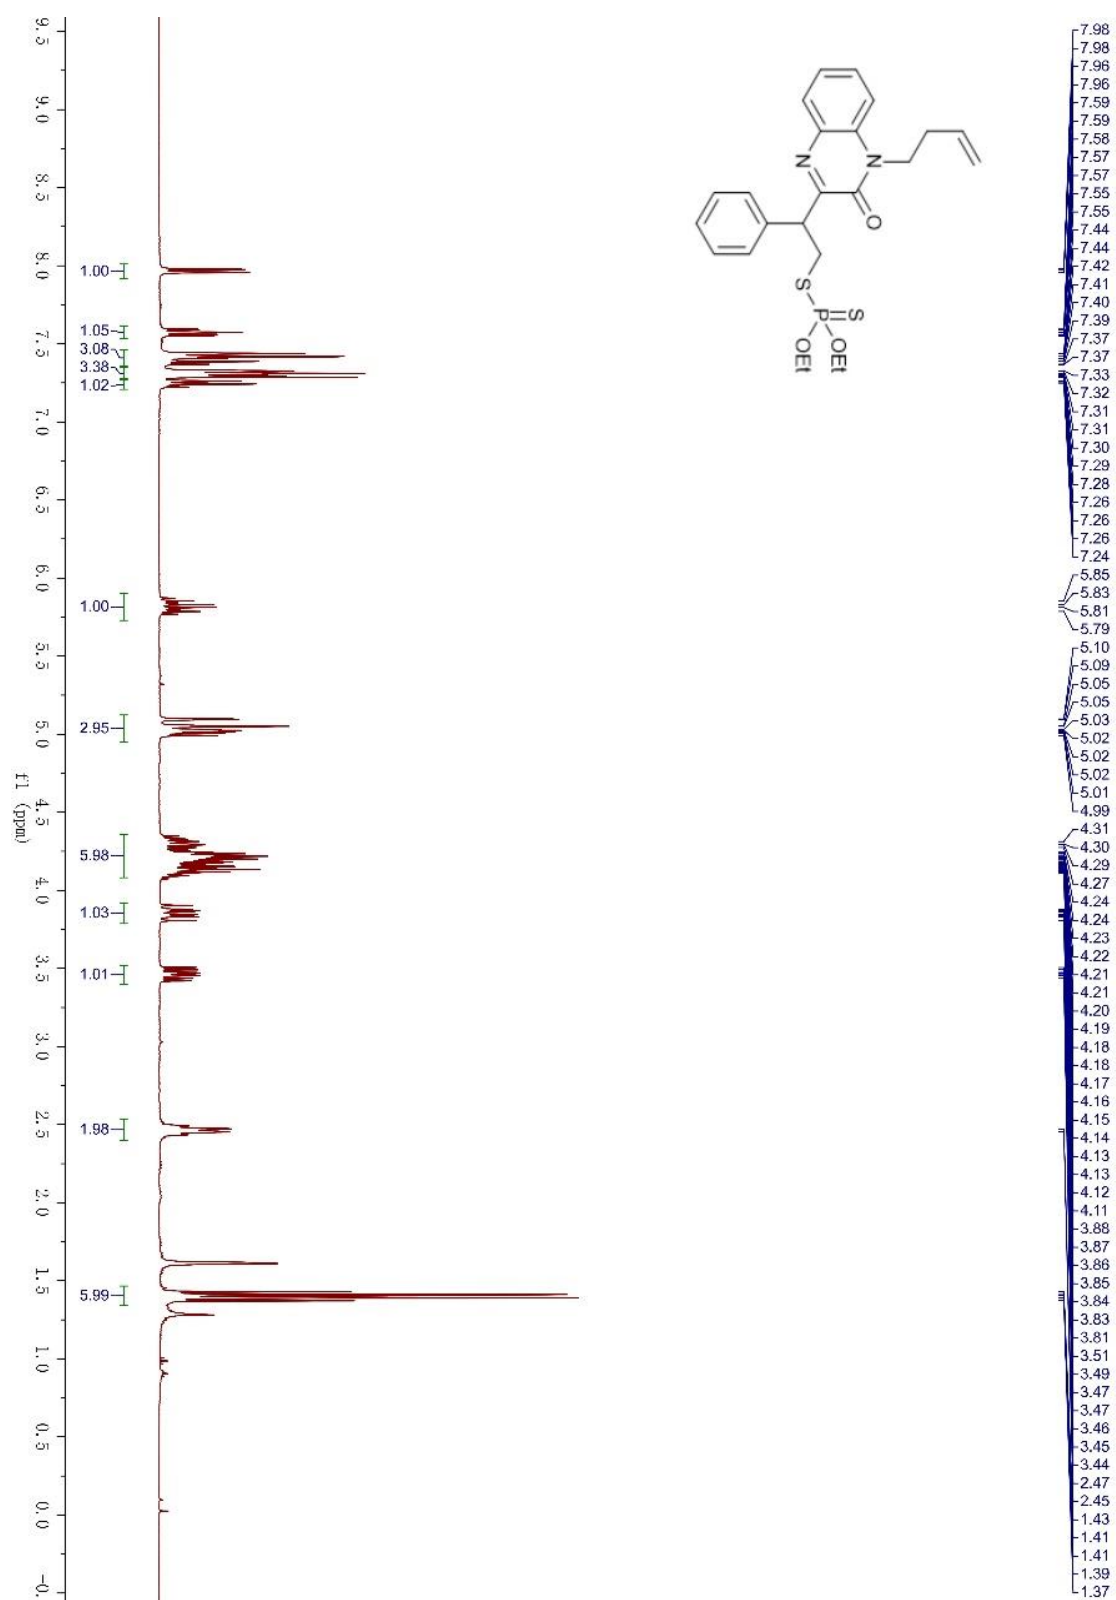

<sup>13</sup>C NMR of **15**

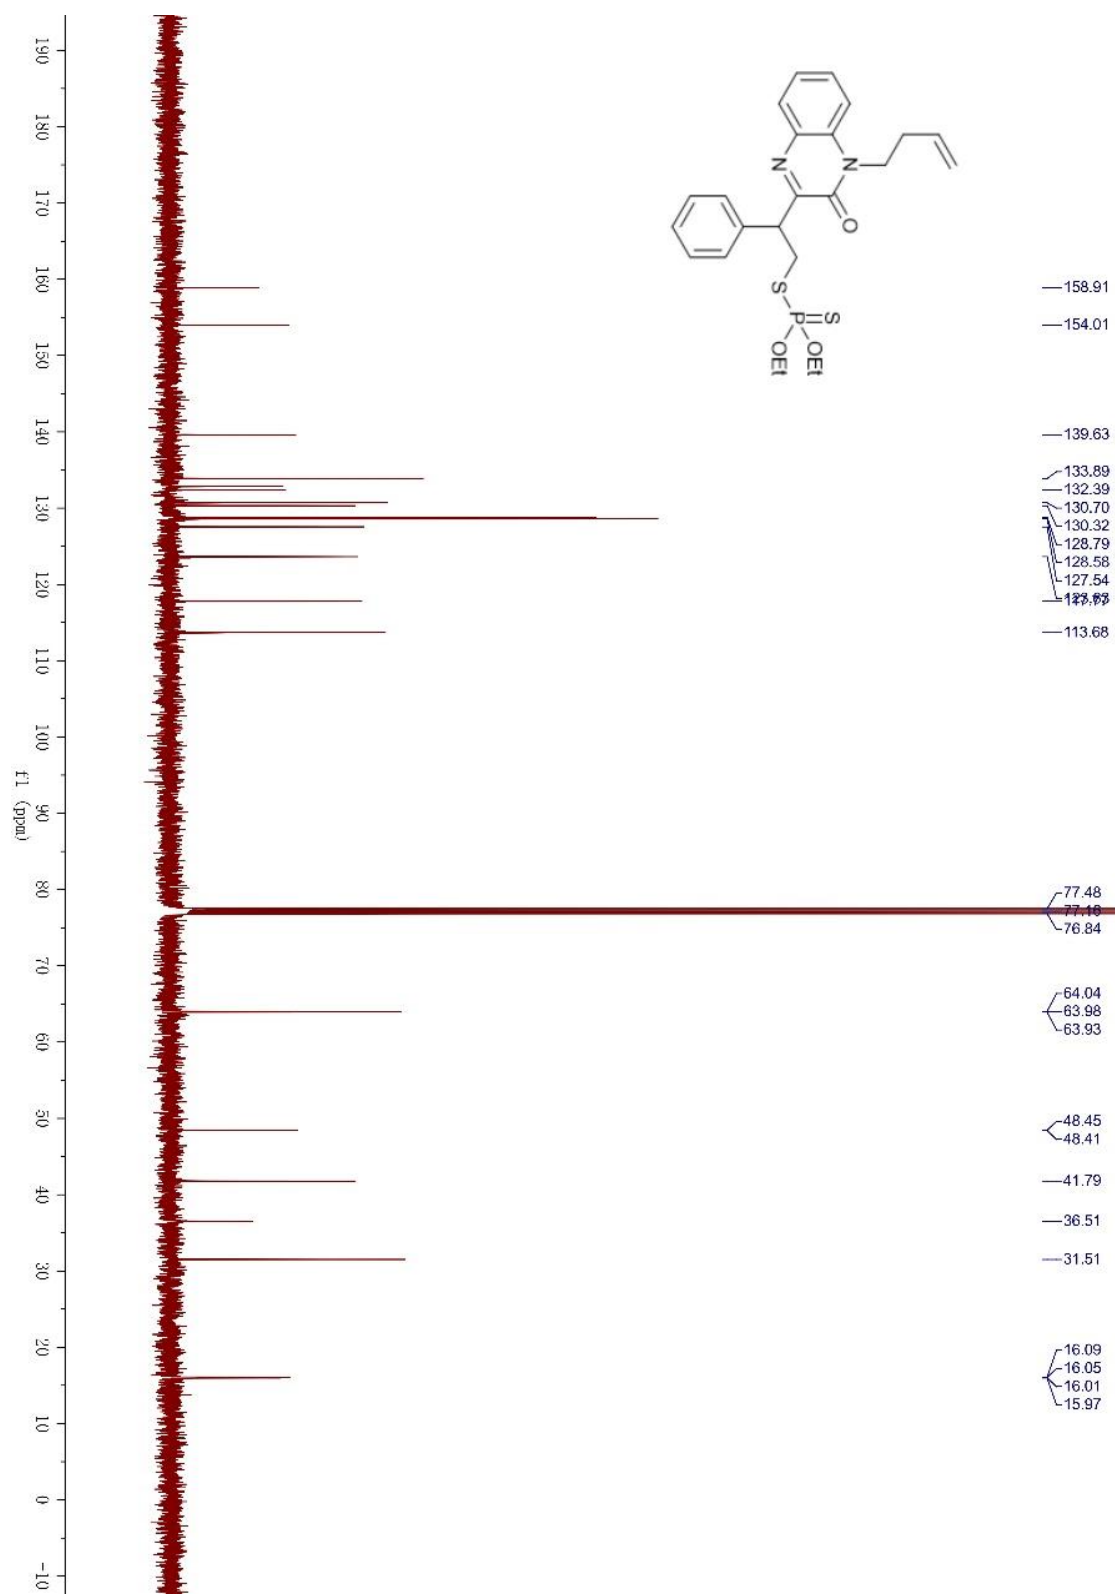

# <sup>1</sup>H NMR of 16

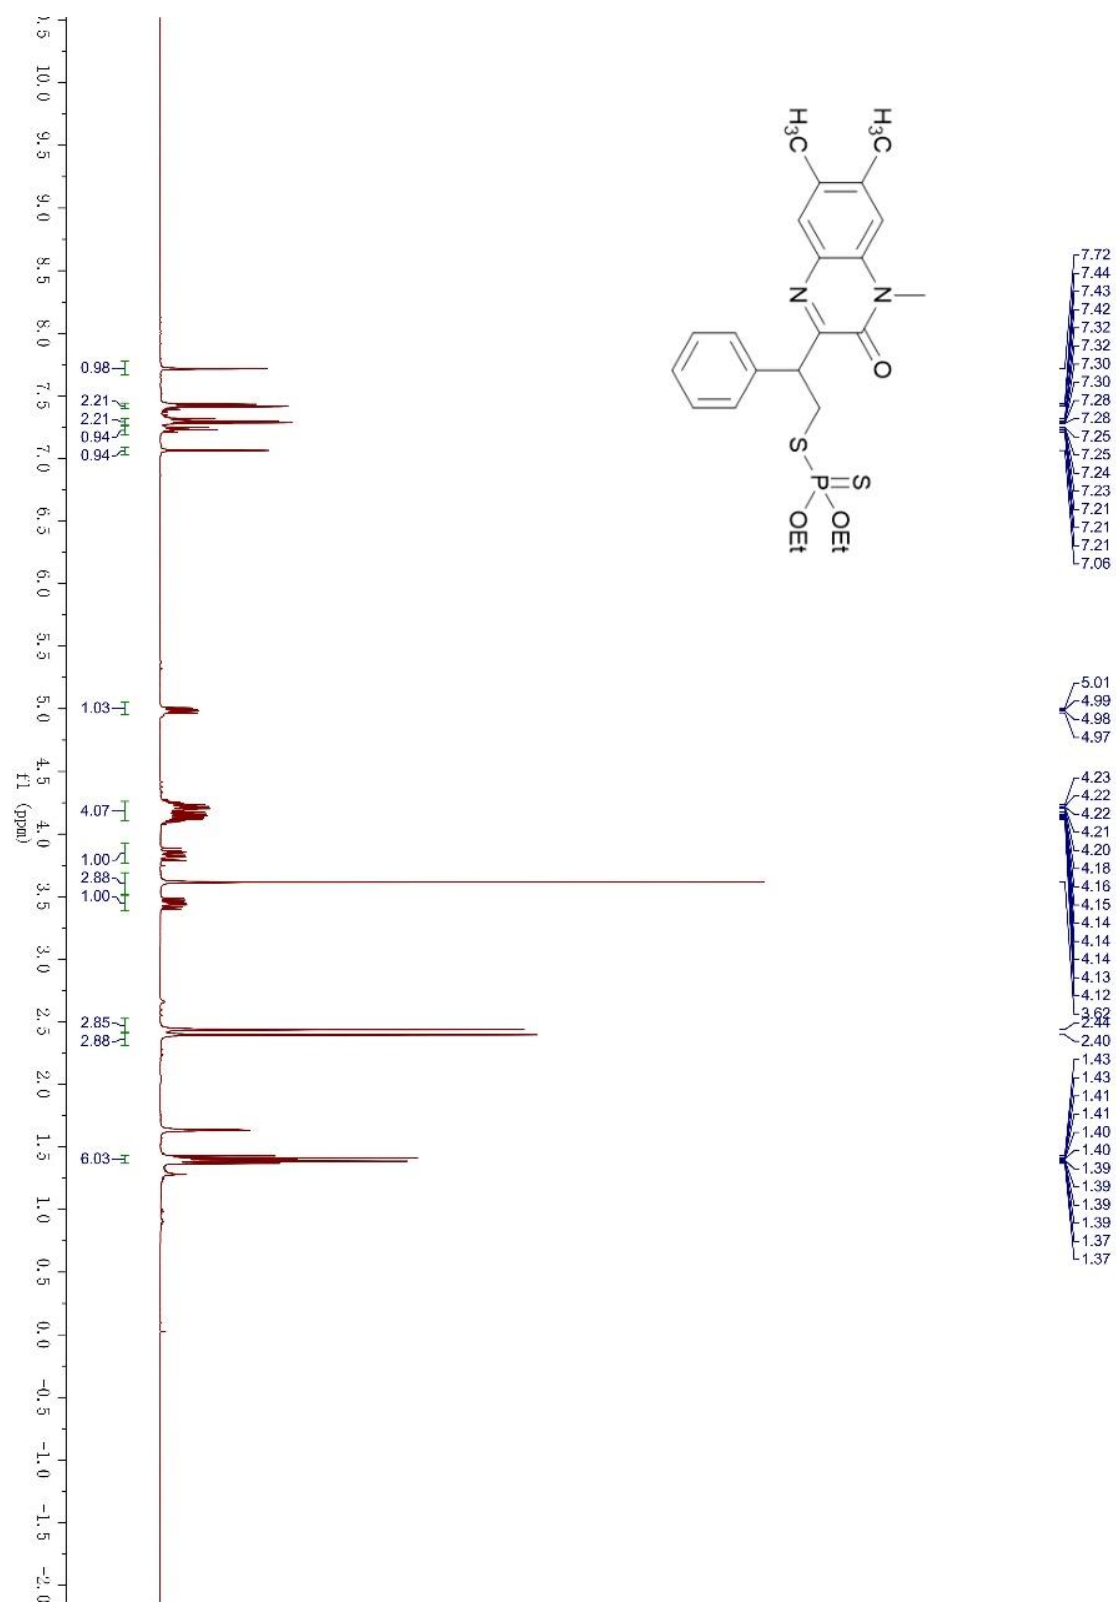

<sup>13</sup>C NMR of 16

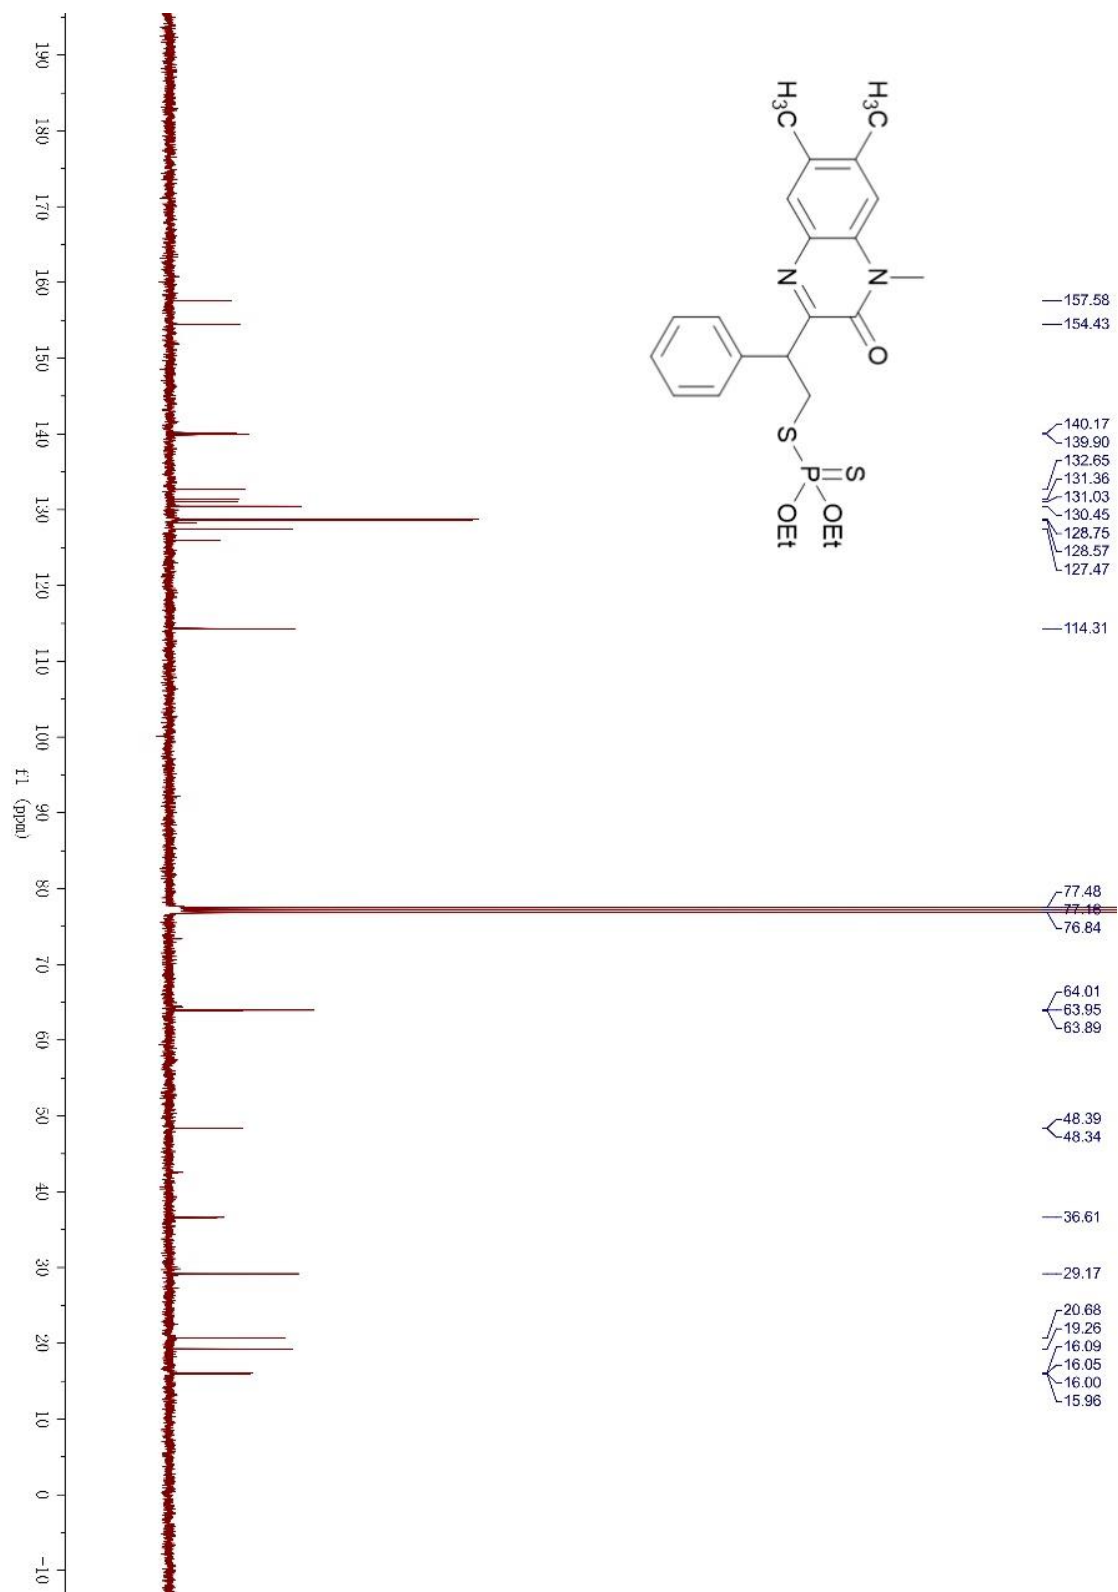

<sup>1</sup>H NMR of 17

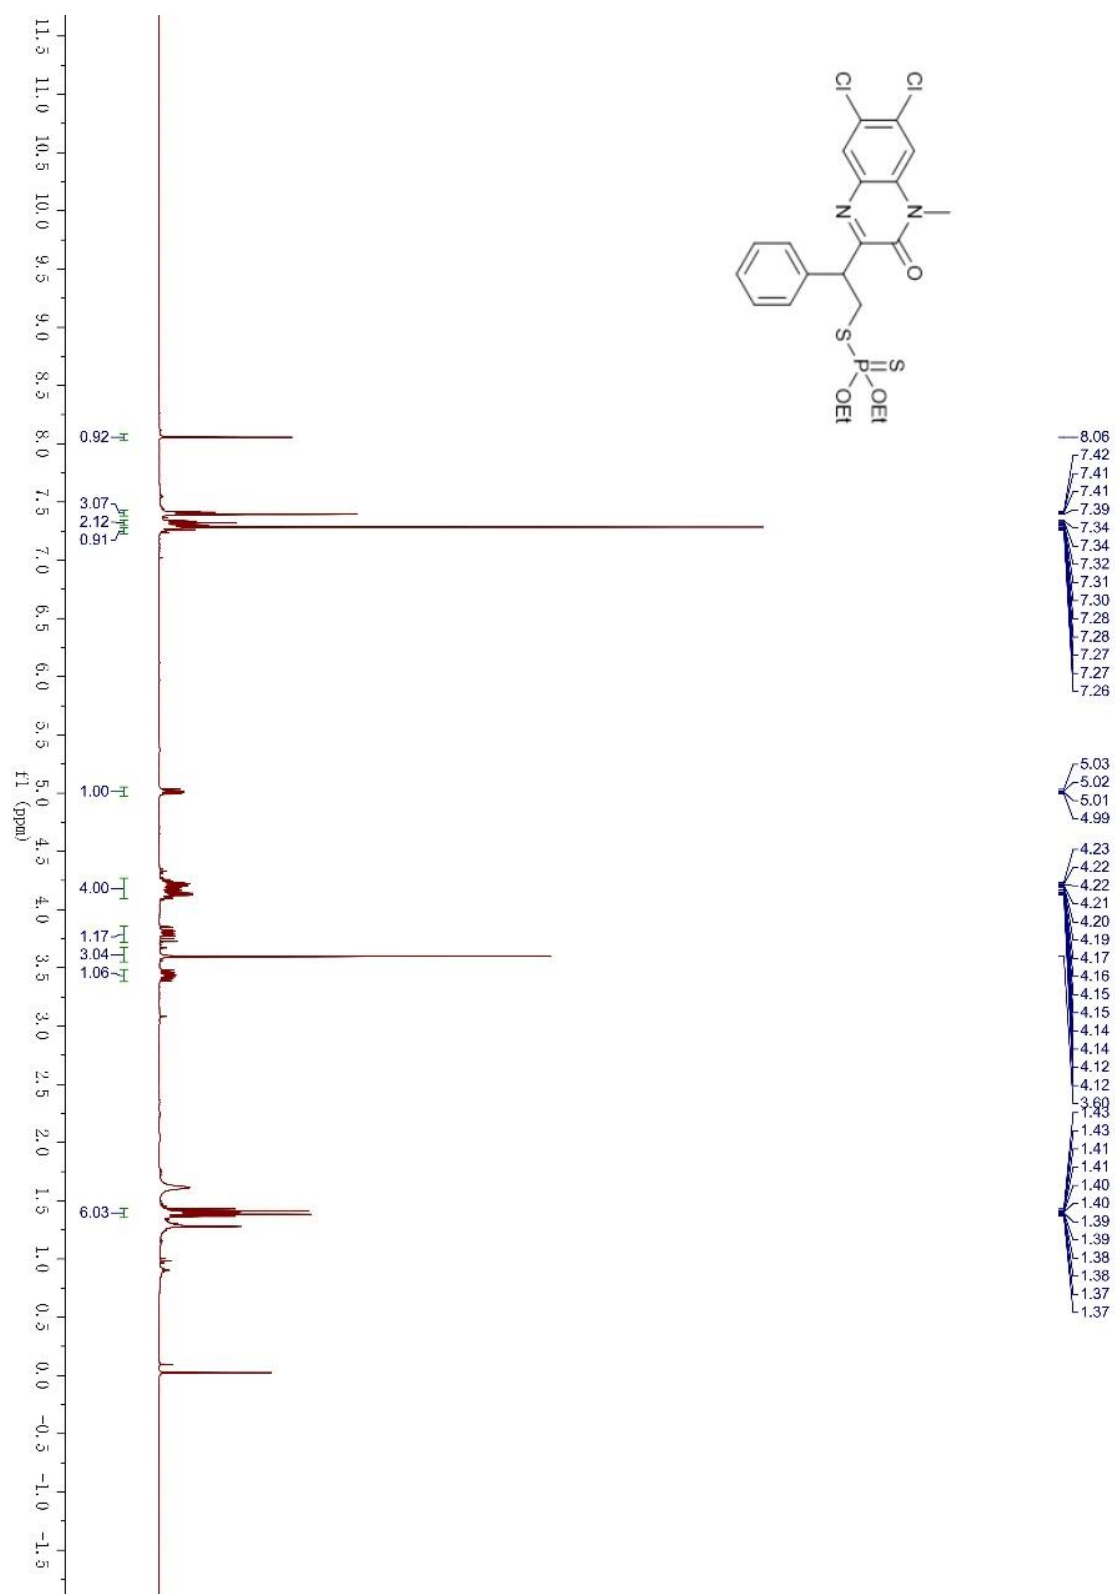

<sup>13</sup>C NMR of 17

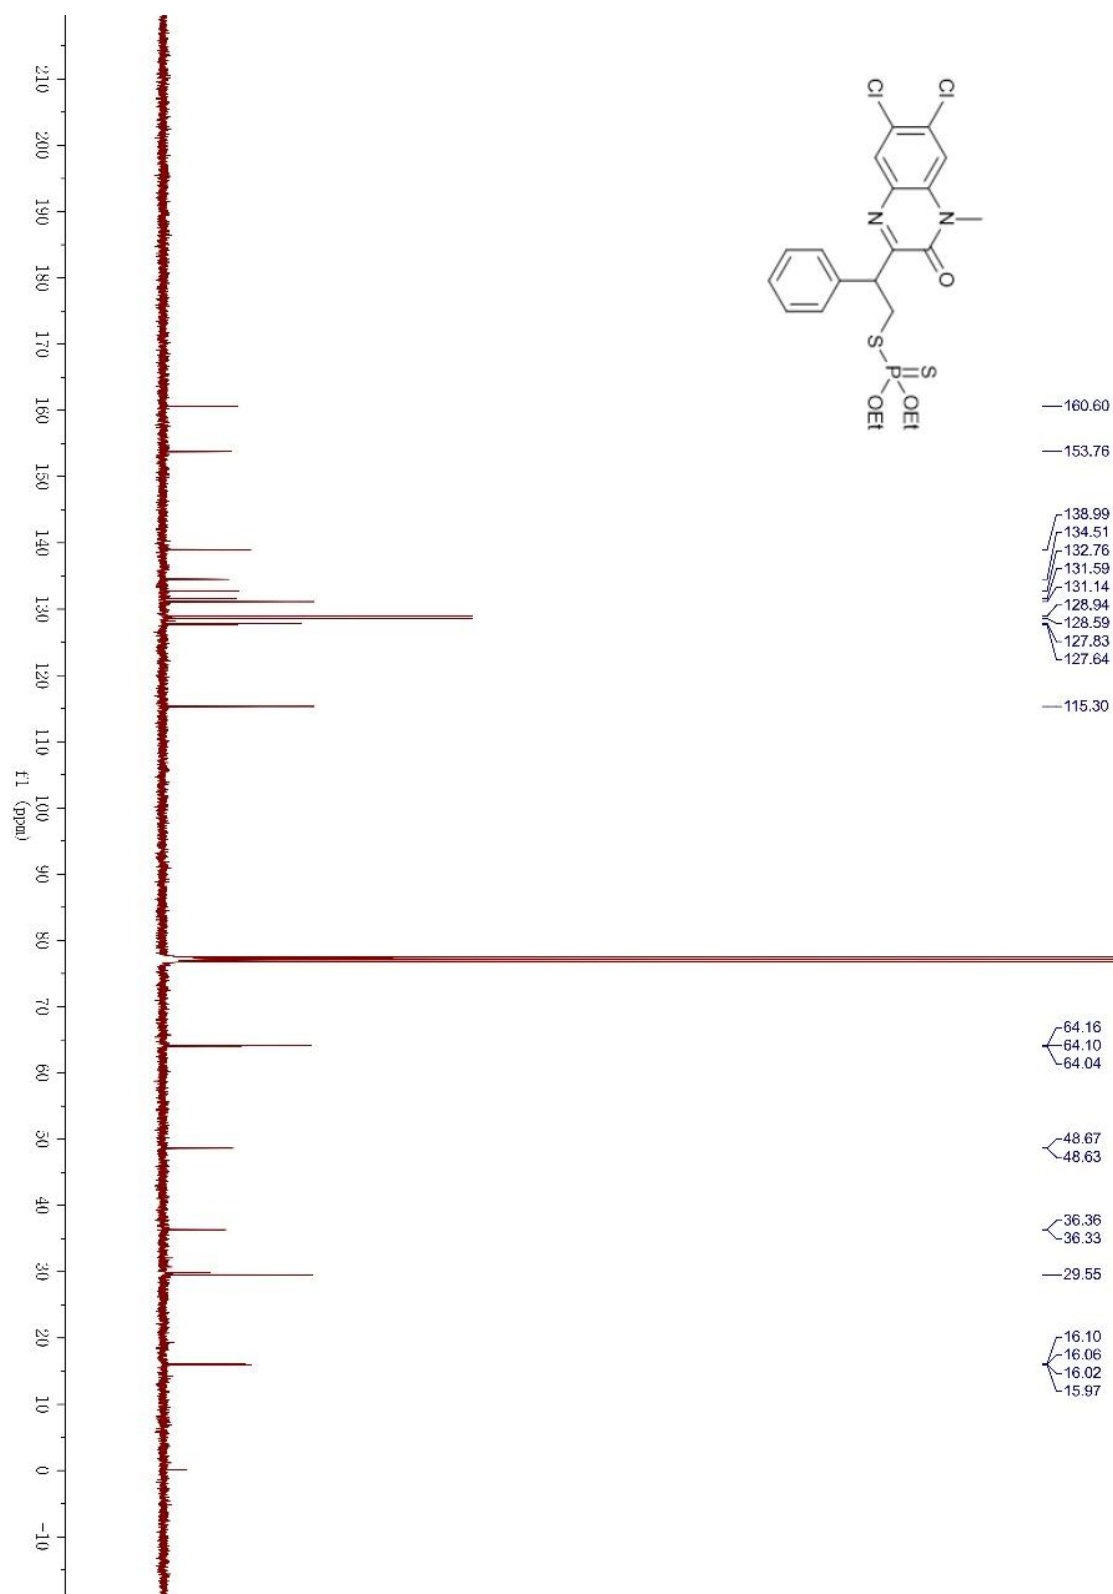

# $^1\text{H}$ NMR of 18

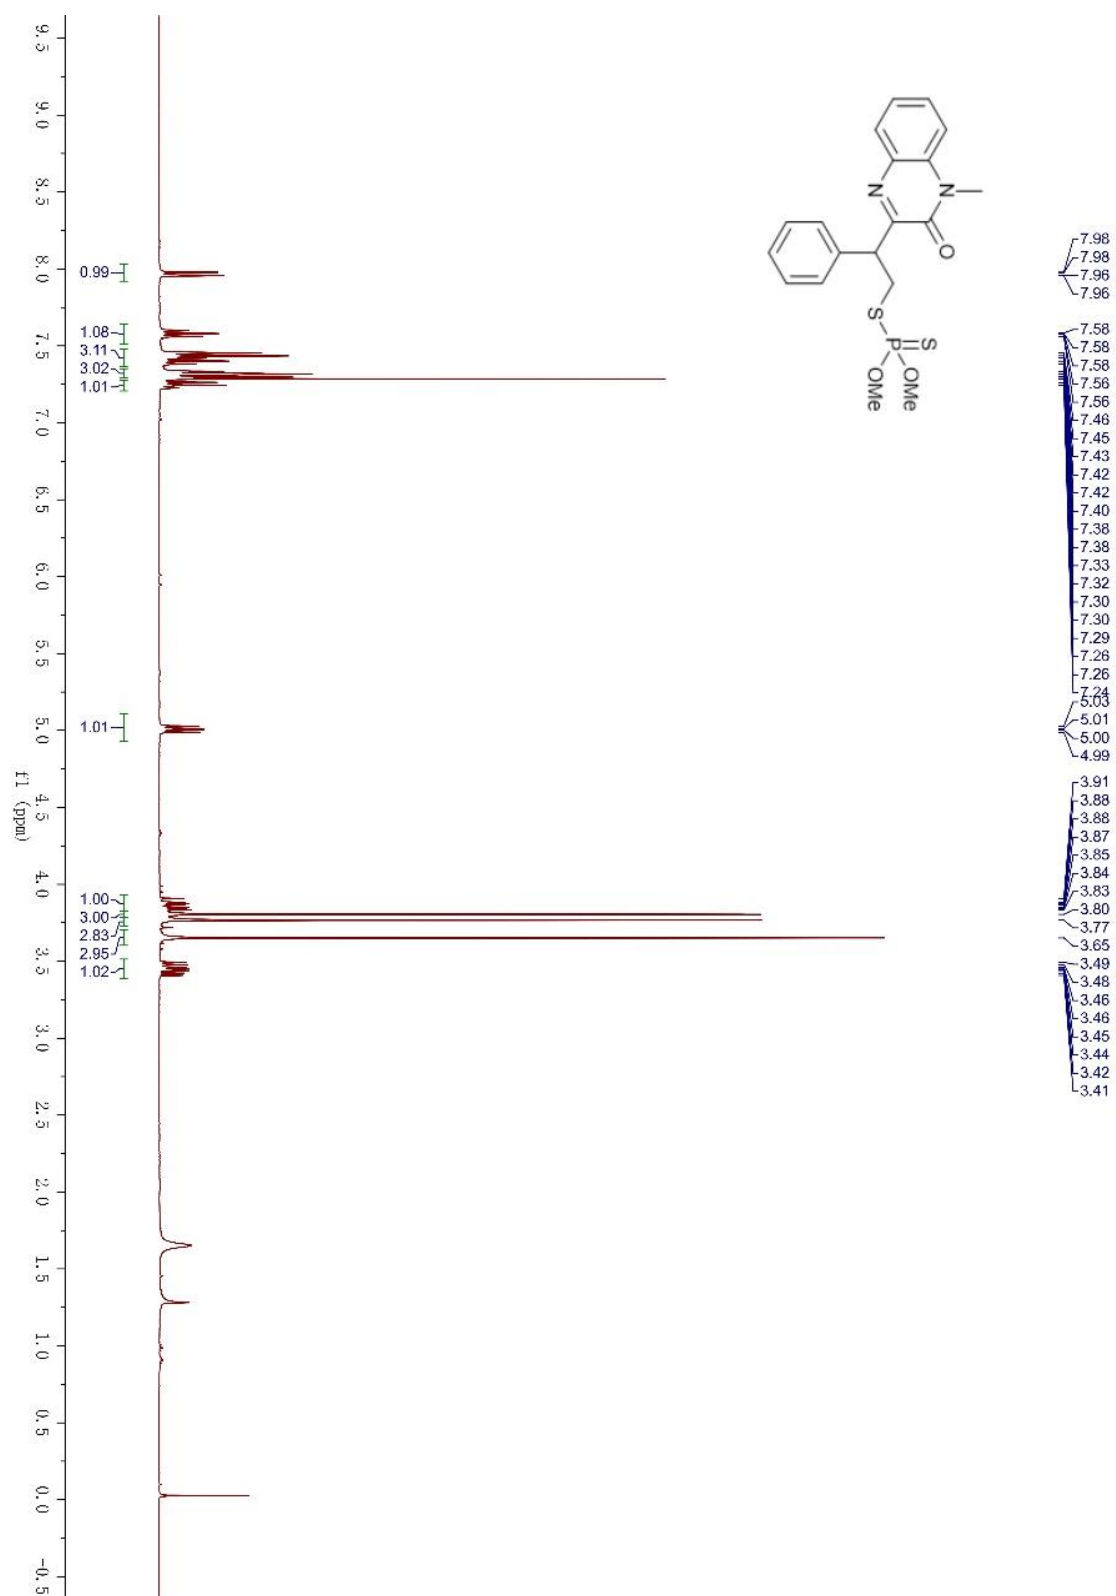

<sup>13</sup>C NMR of **18**

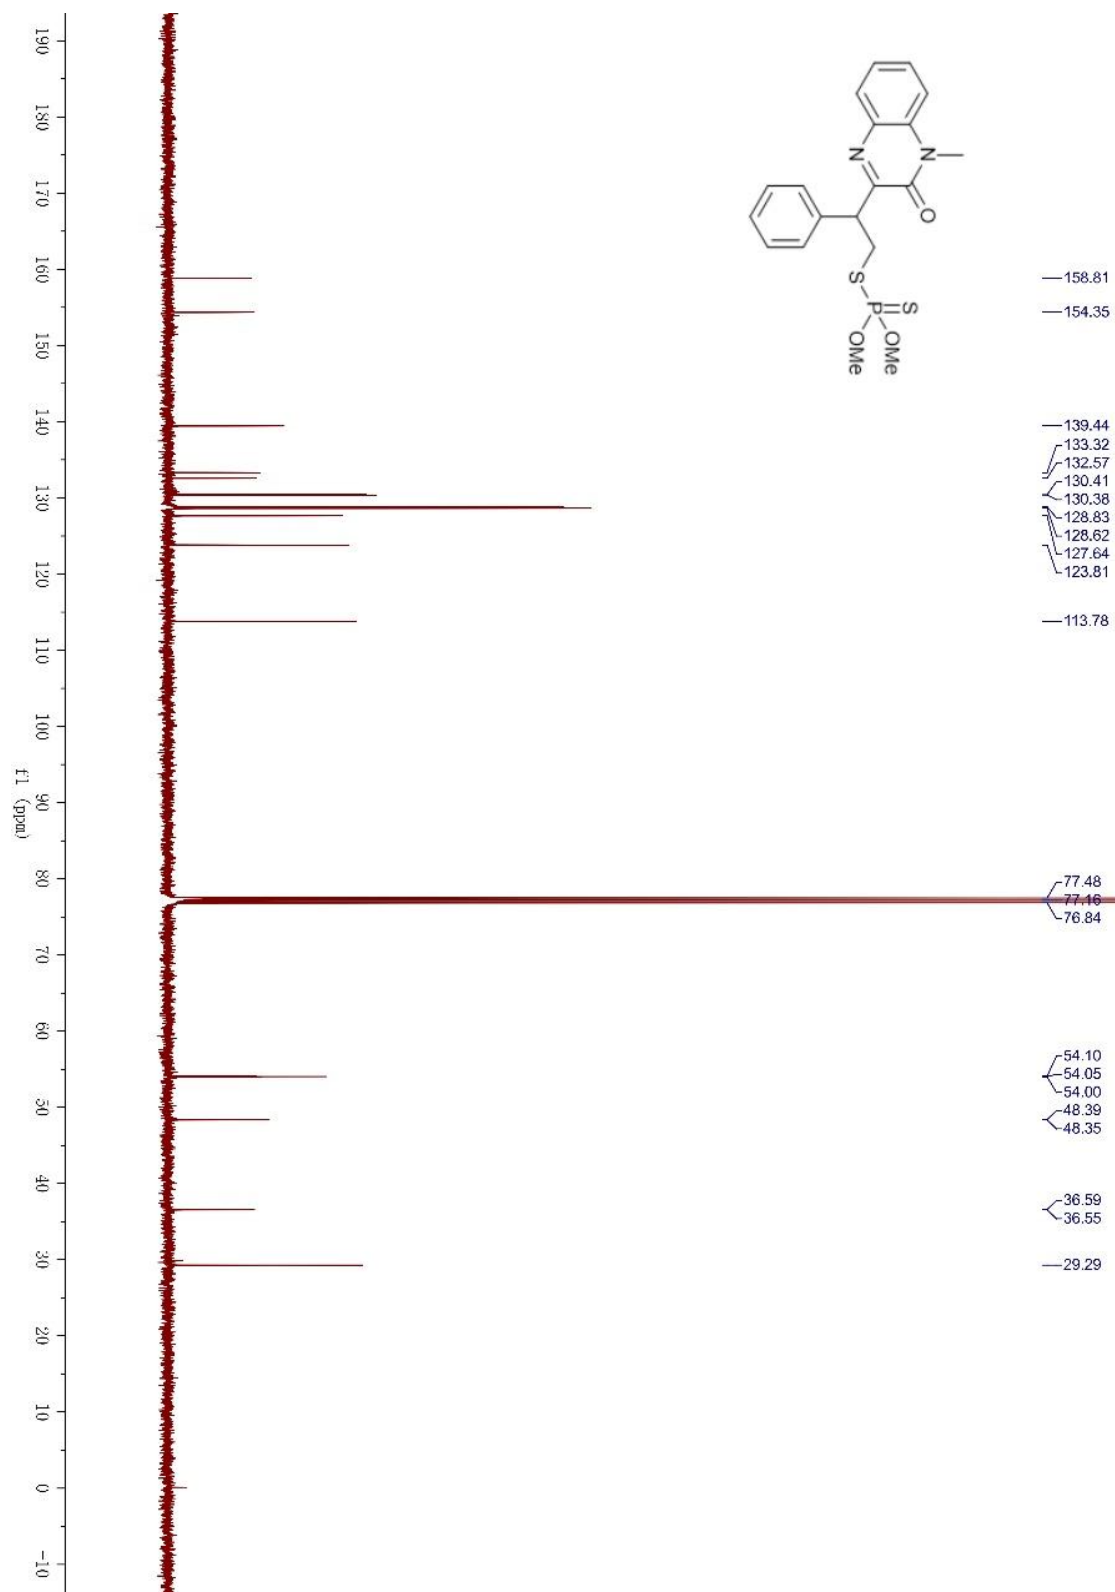



# <sup>1</sup>H NMR of 19

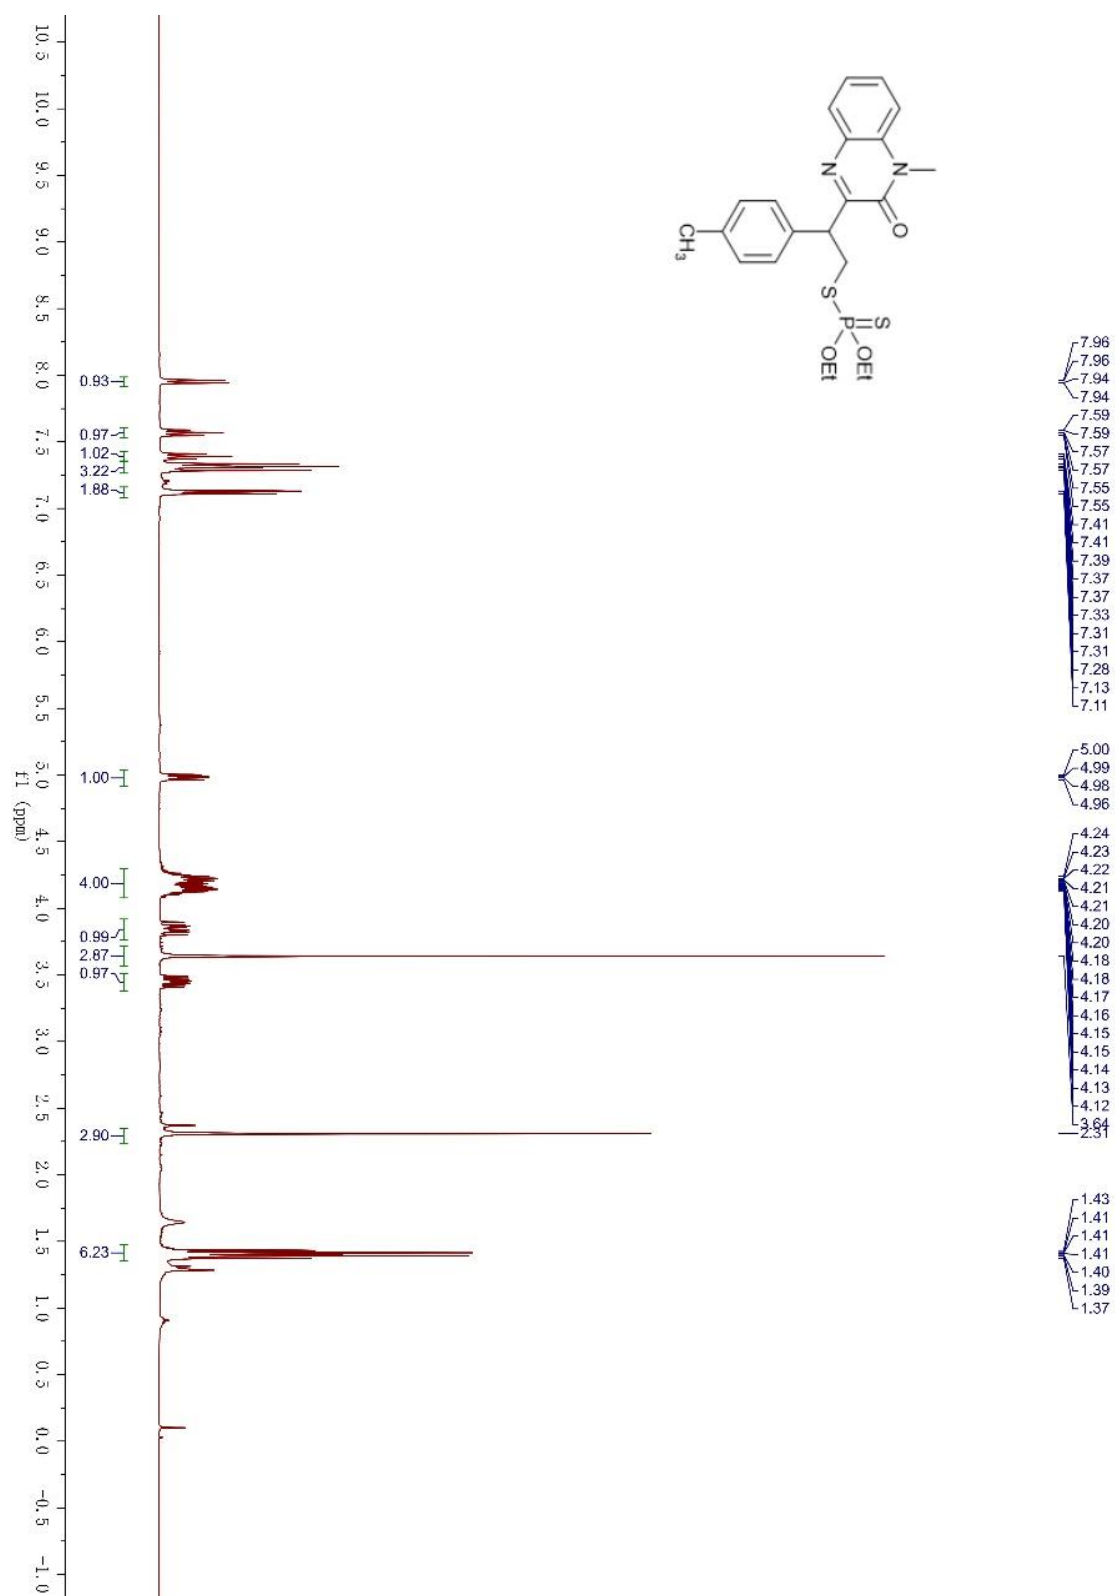

<sup>13</sup>C NMR of **19**

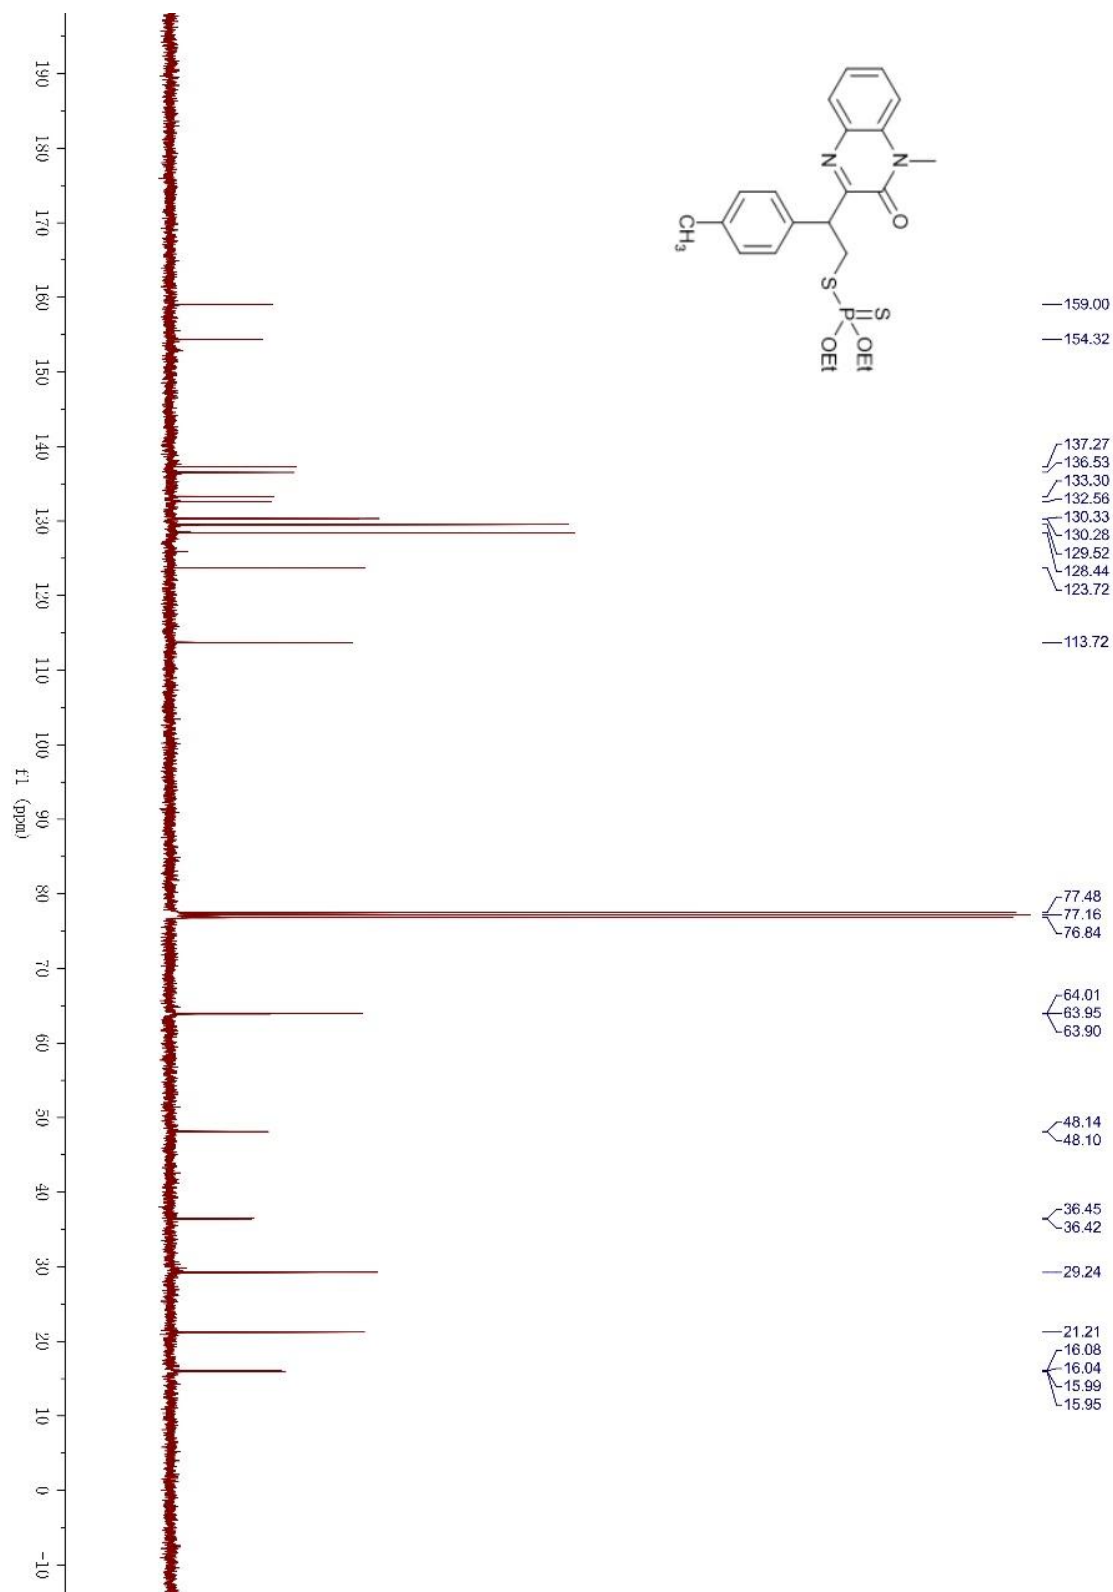

<sup>1</sup>H NMR of 20

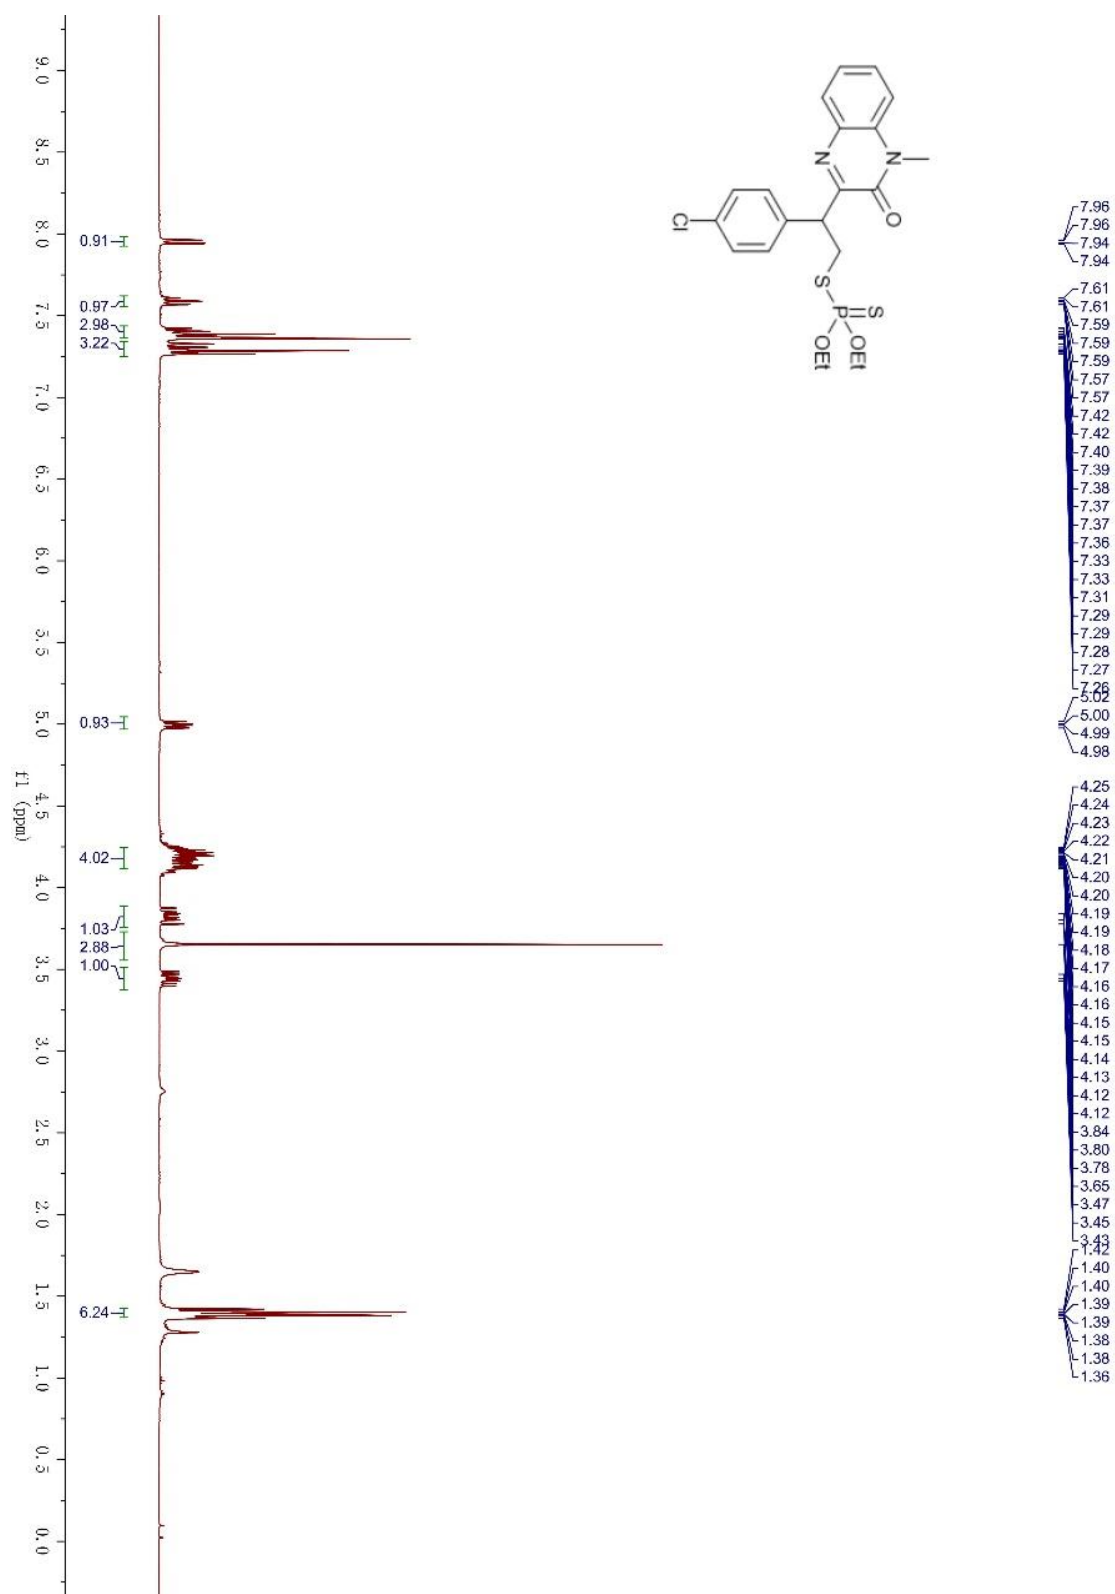

<sup>13</sup>C NMR of 20

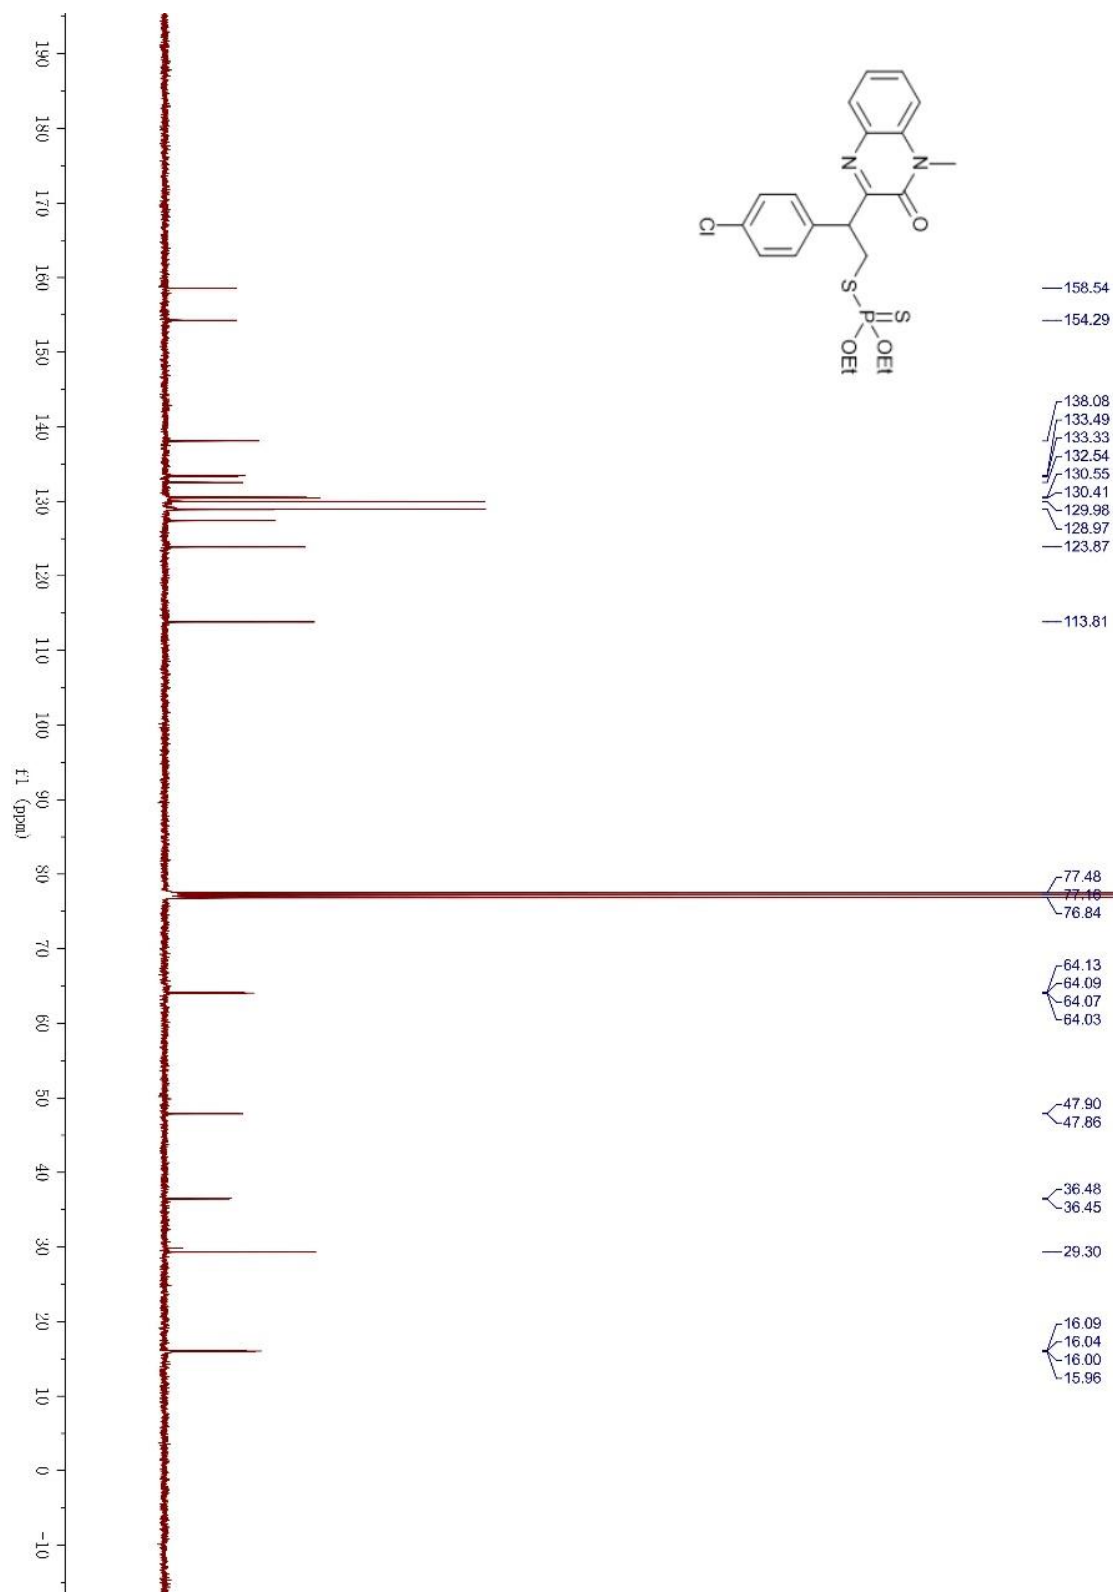

# $^1\text{H}$ NMR of 21

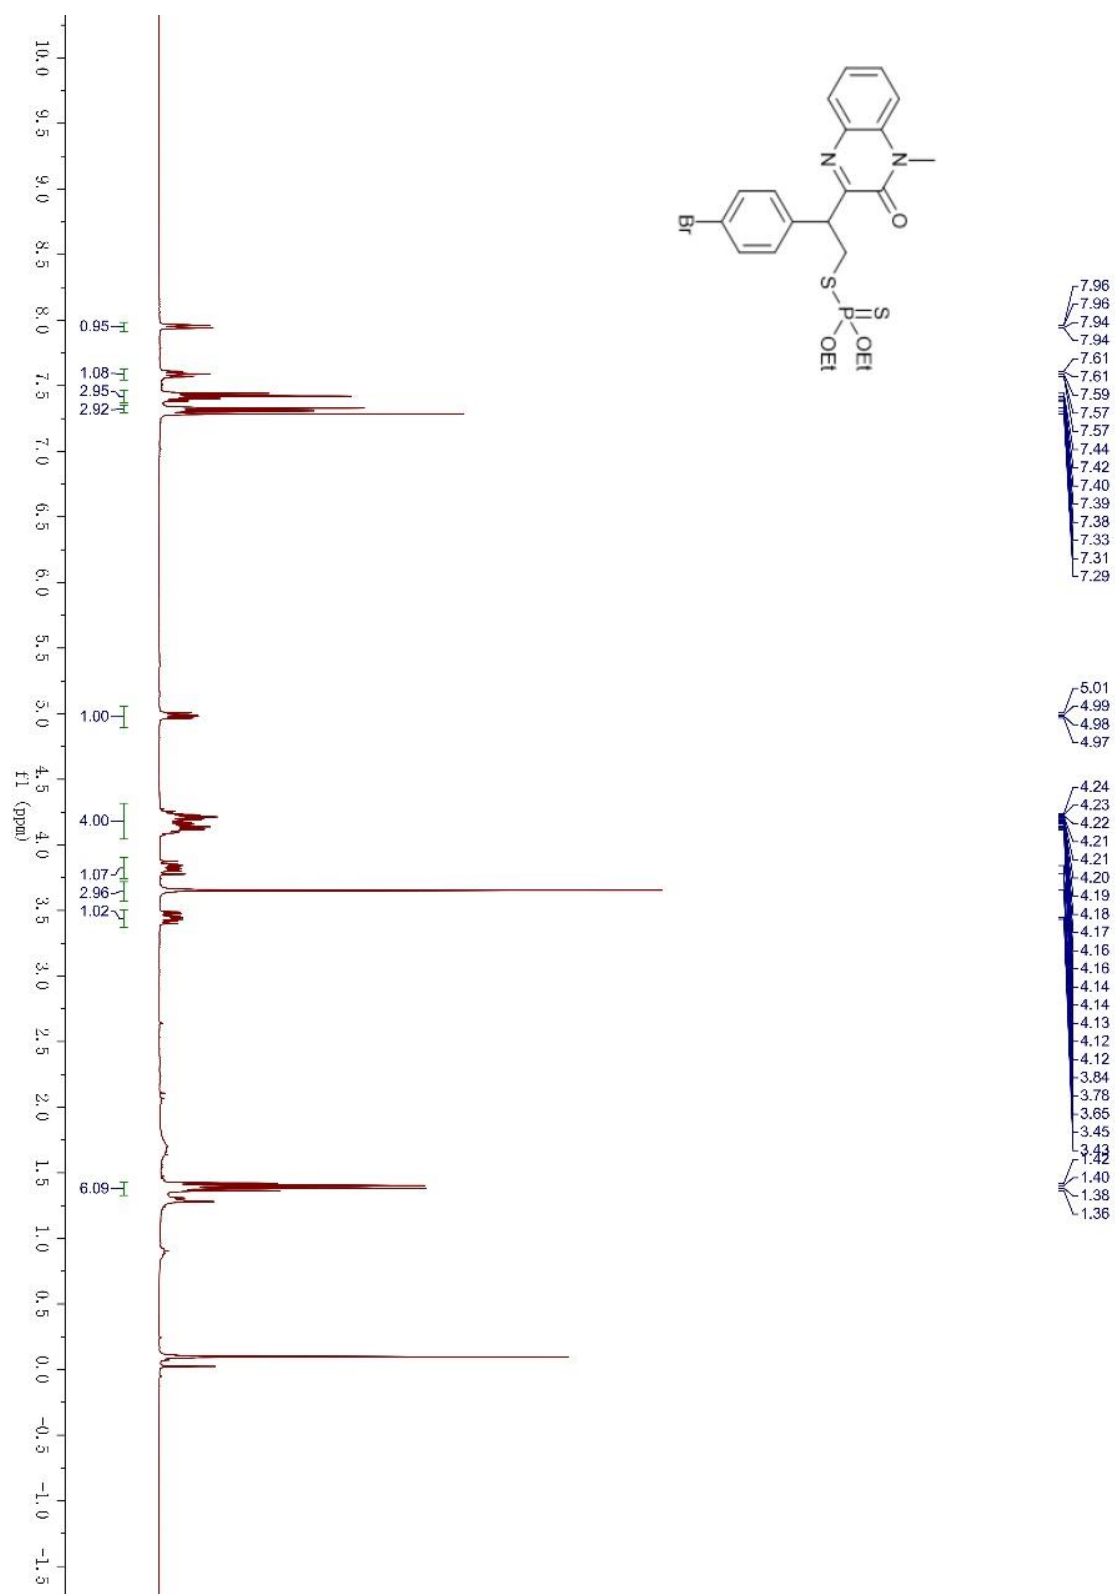

<sup>13</sup>C NMR of 21

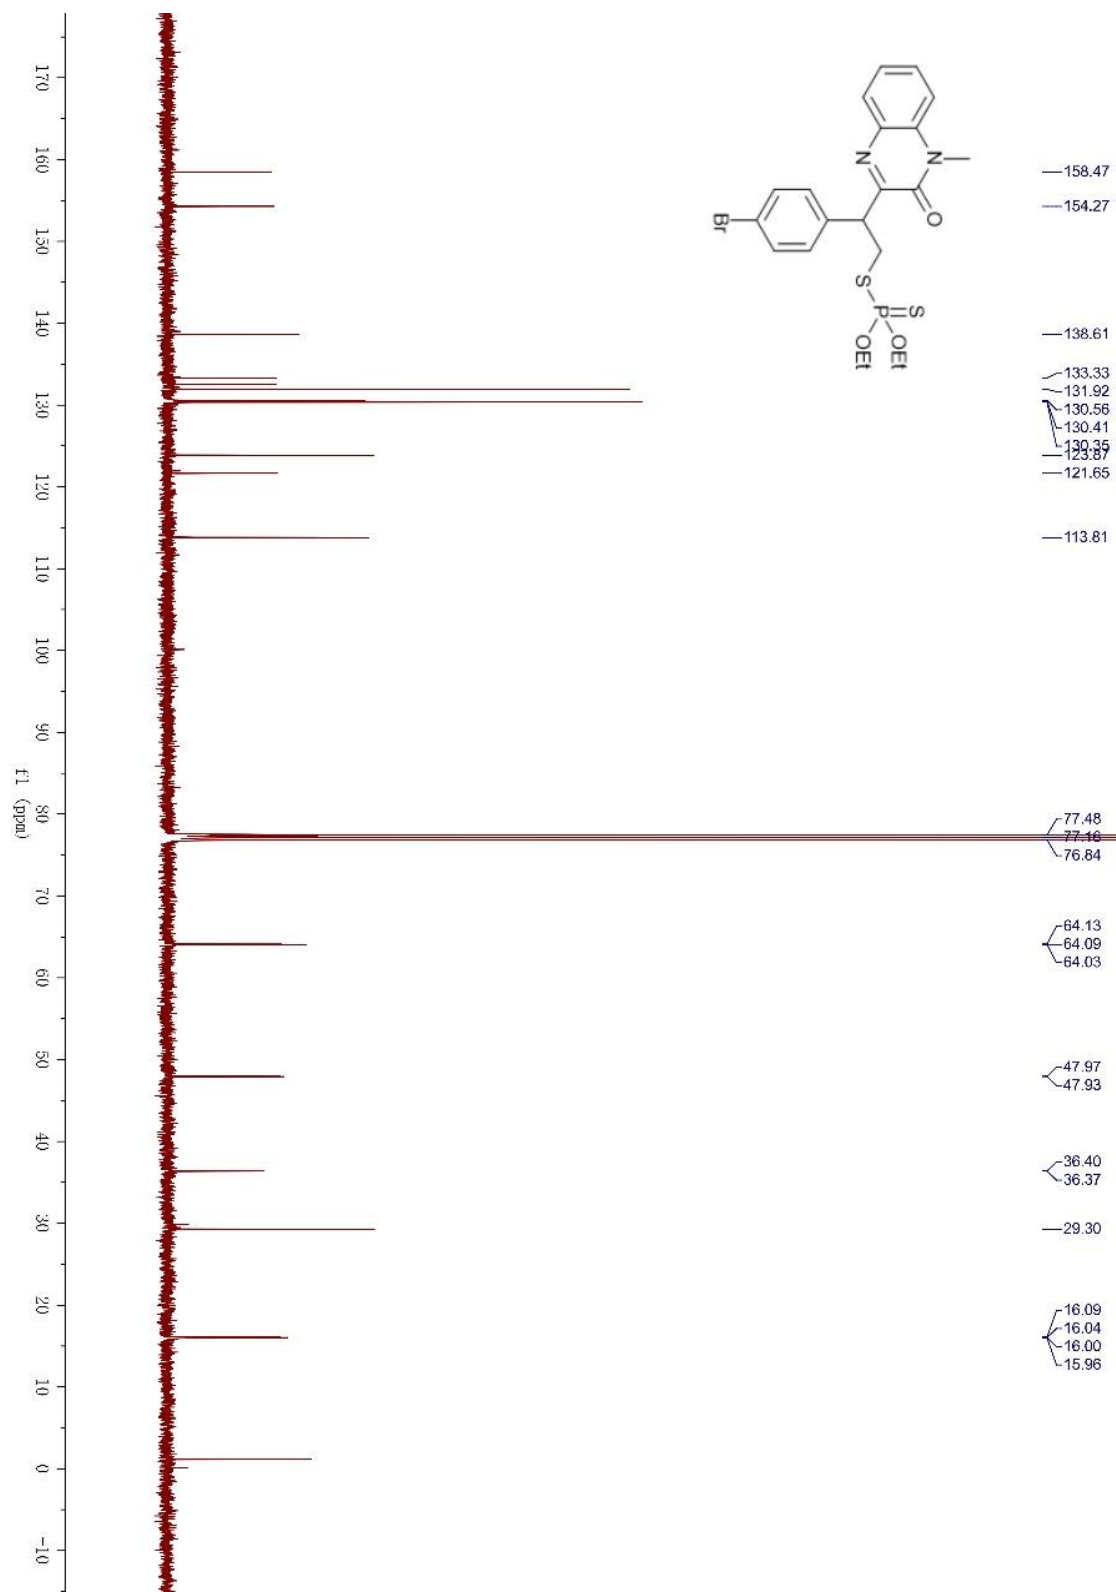

# $^1\text{H}$ NMR of 22

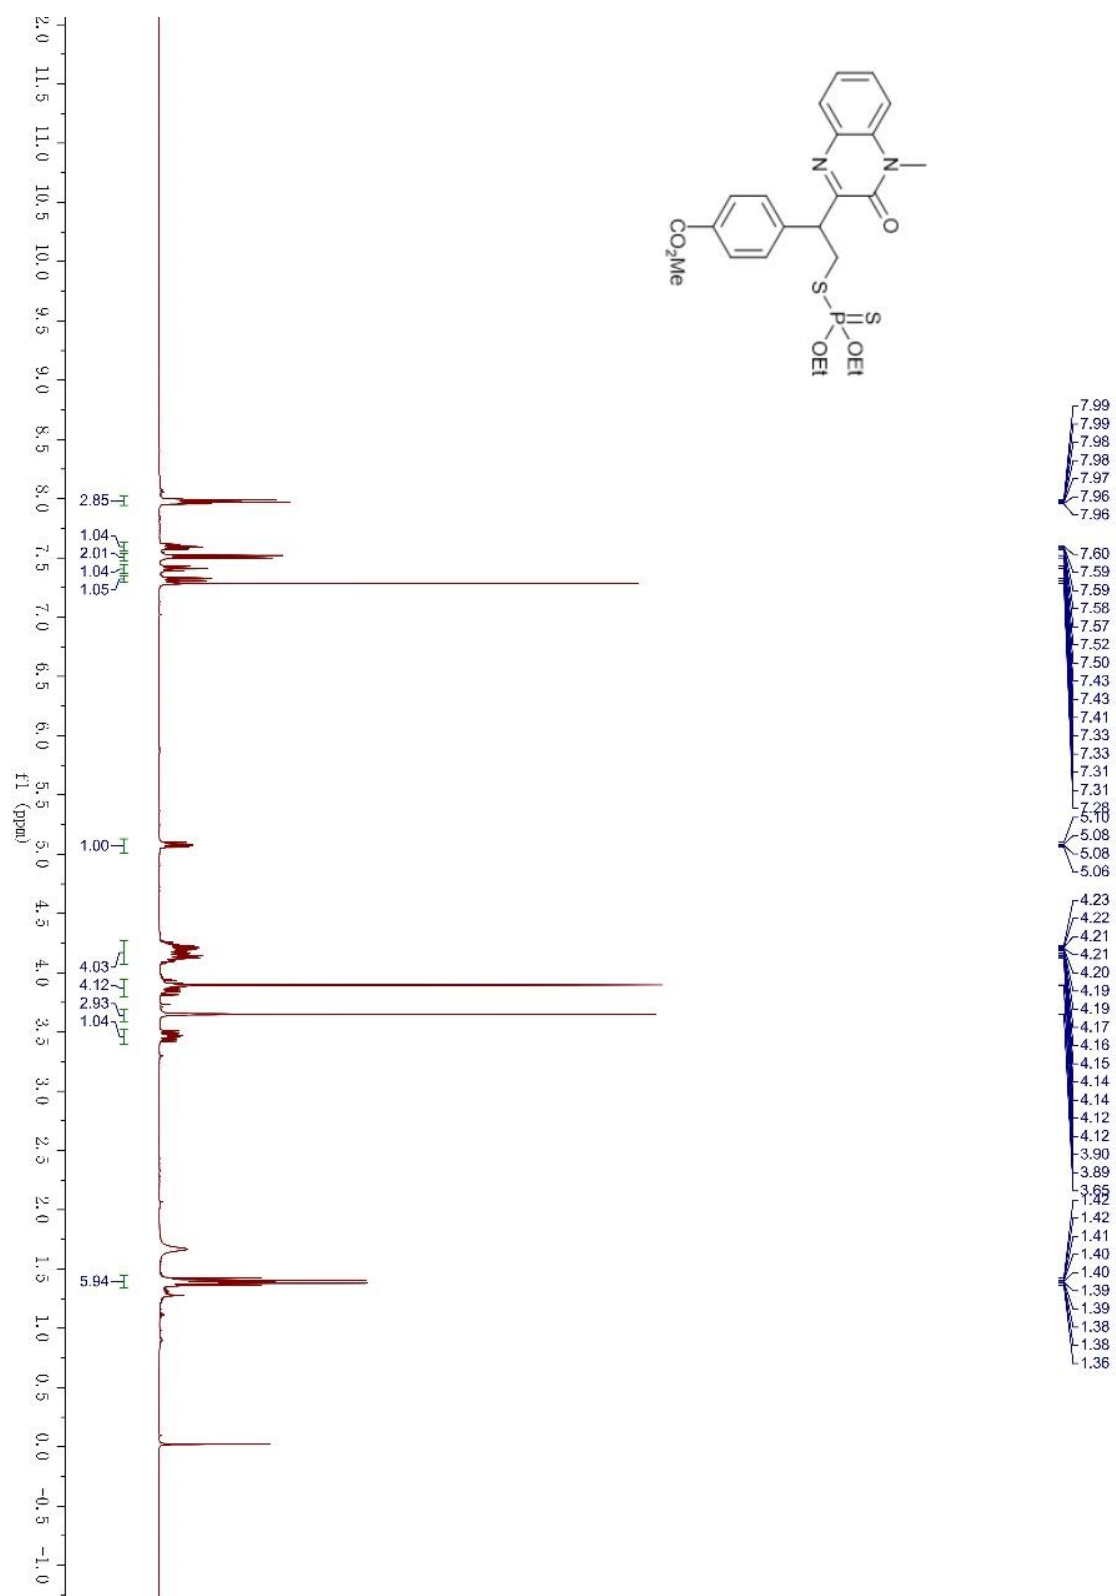

<sup>13</sup>C NMR of 22

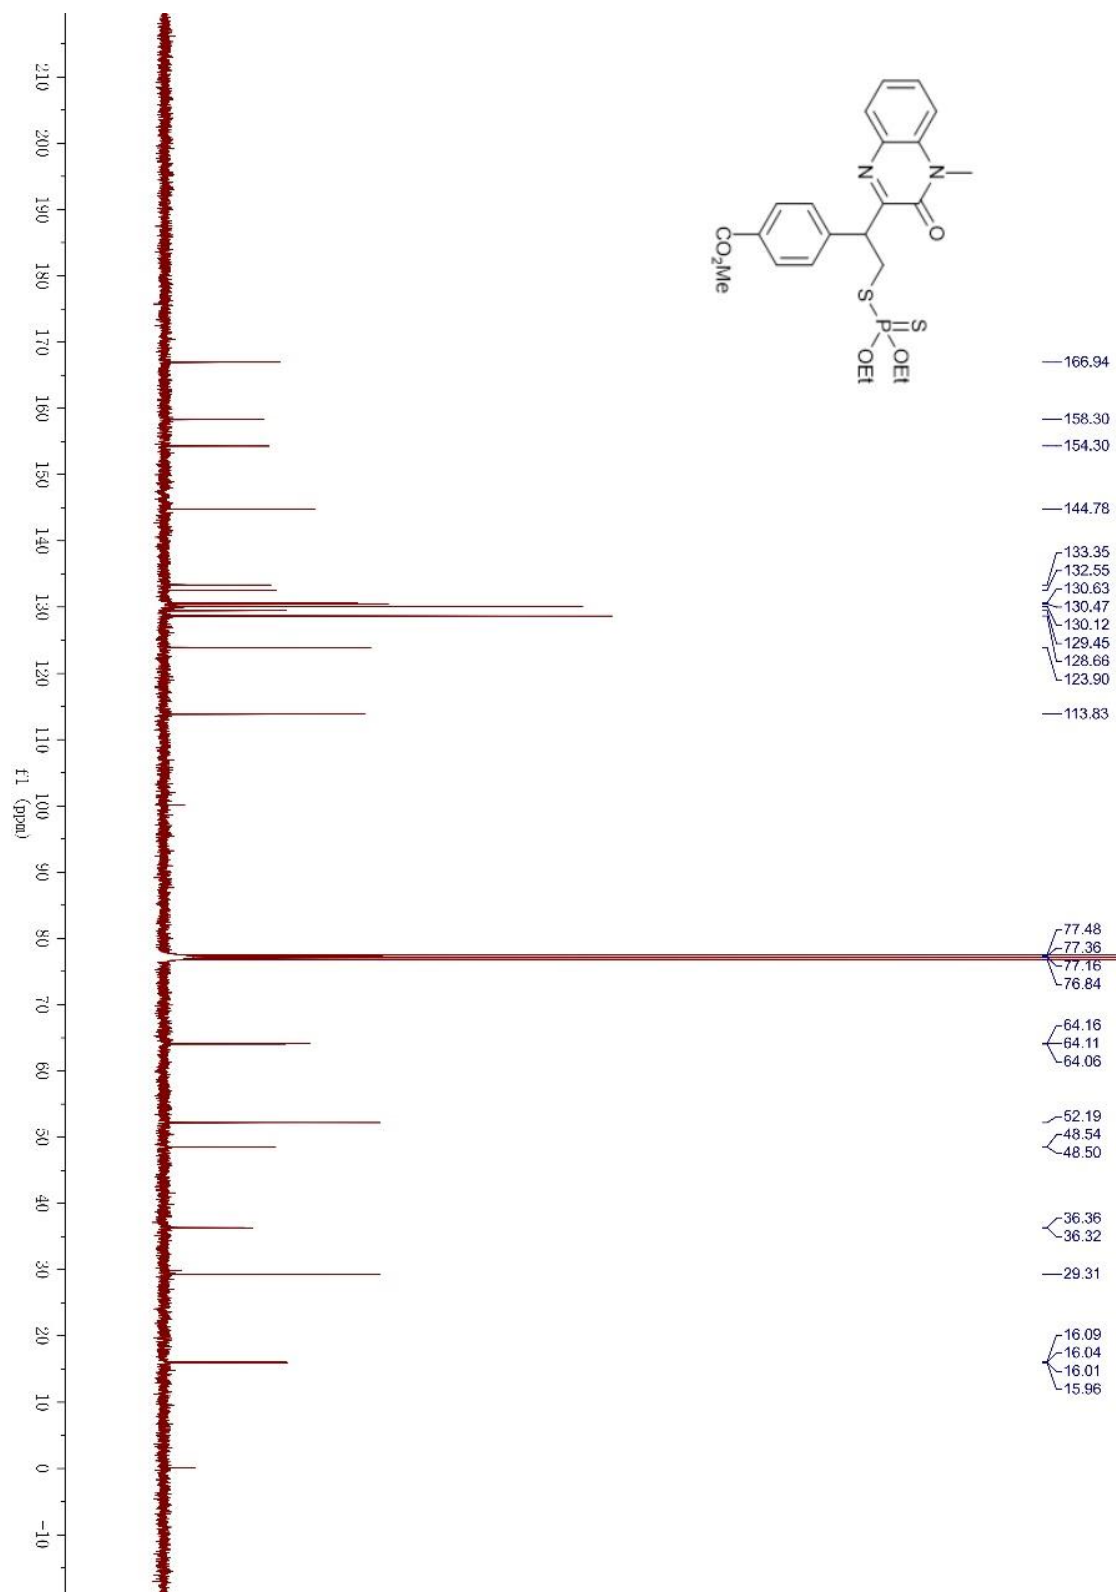



# $^1\text{H}$ NMR of 23

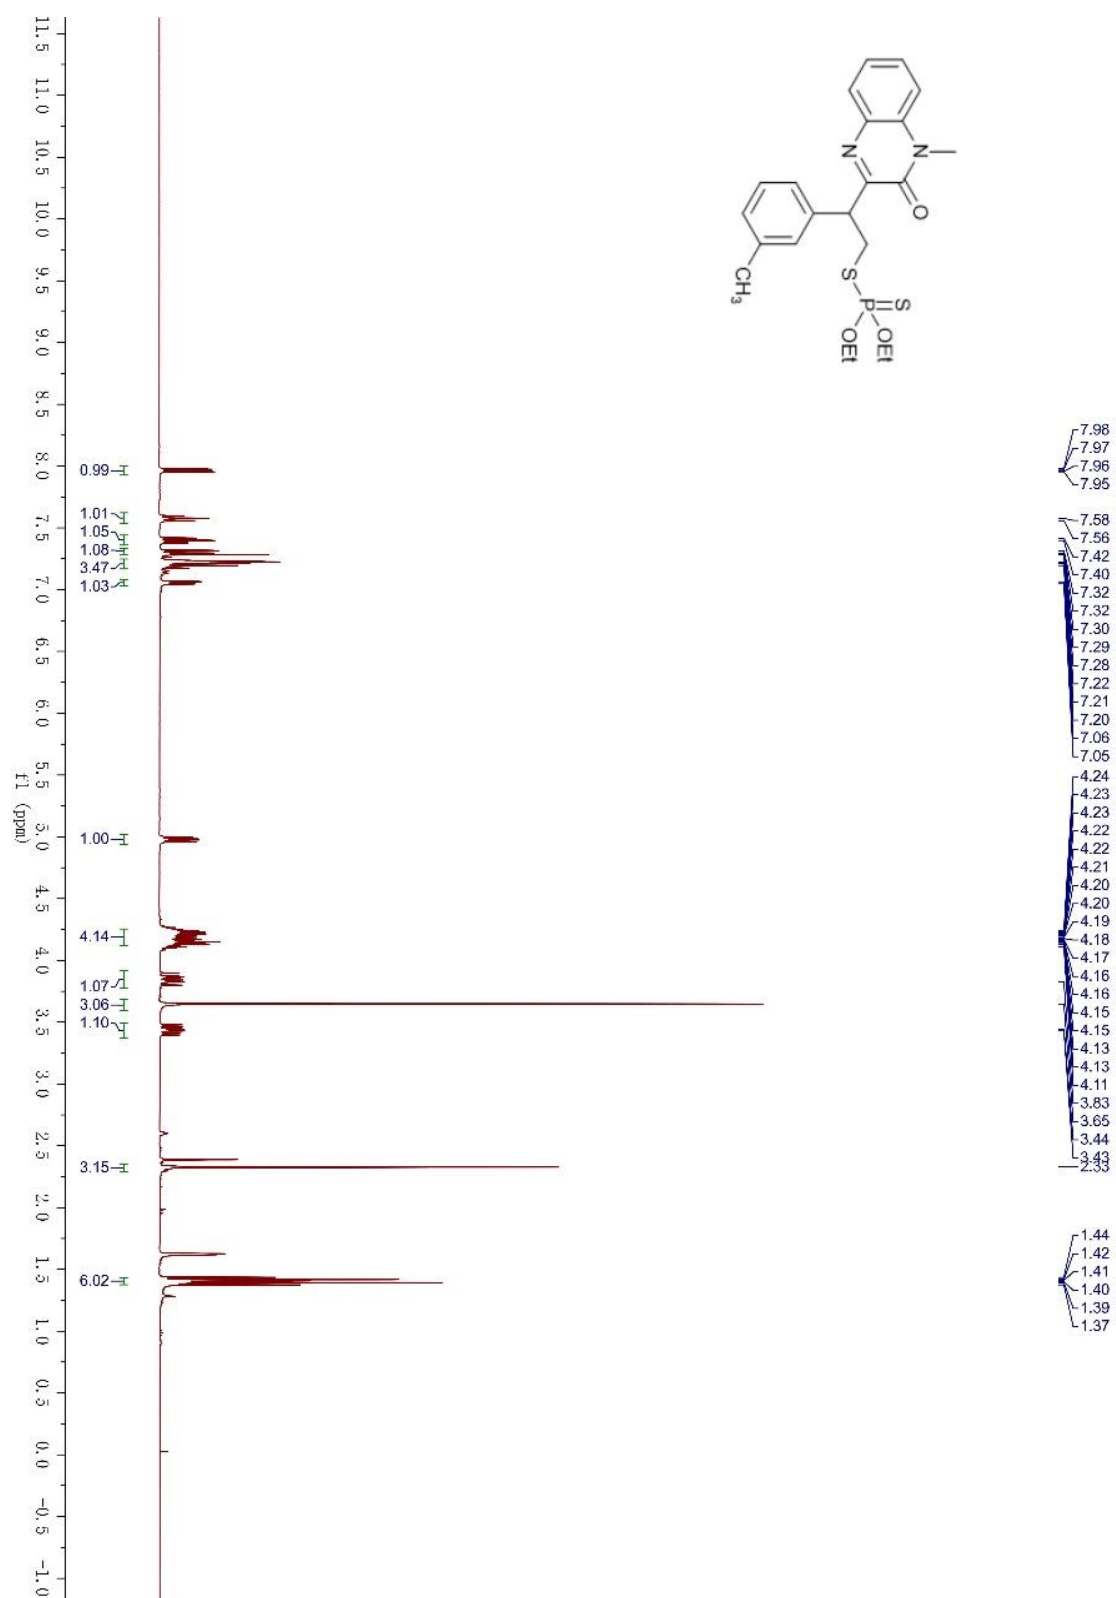

<sup>13</sup>C NMR of 23

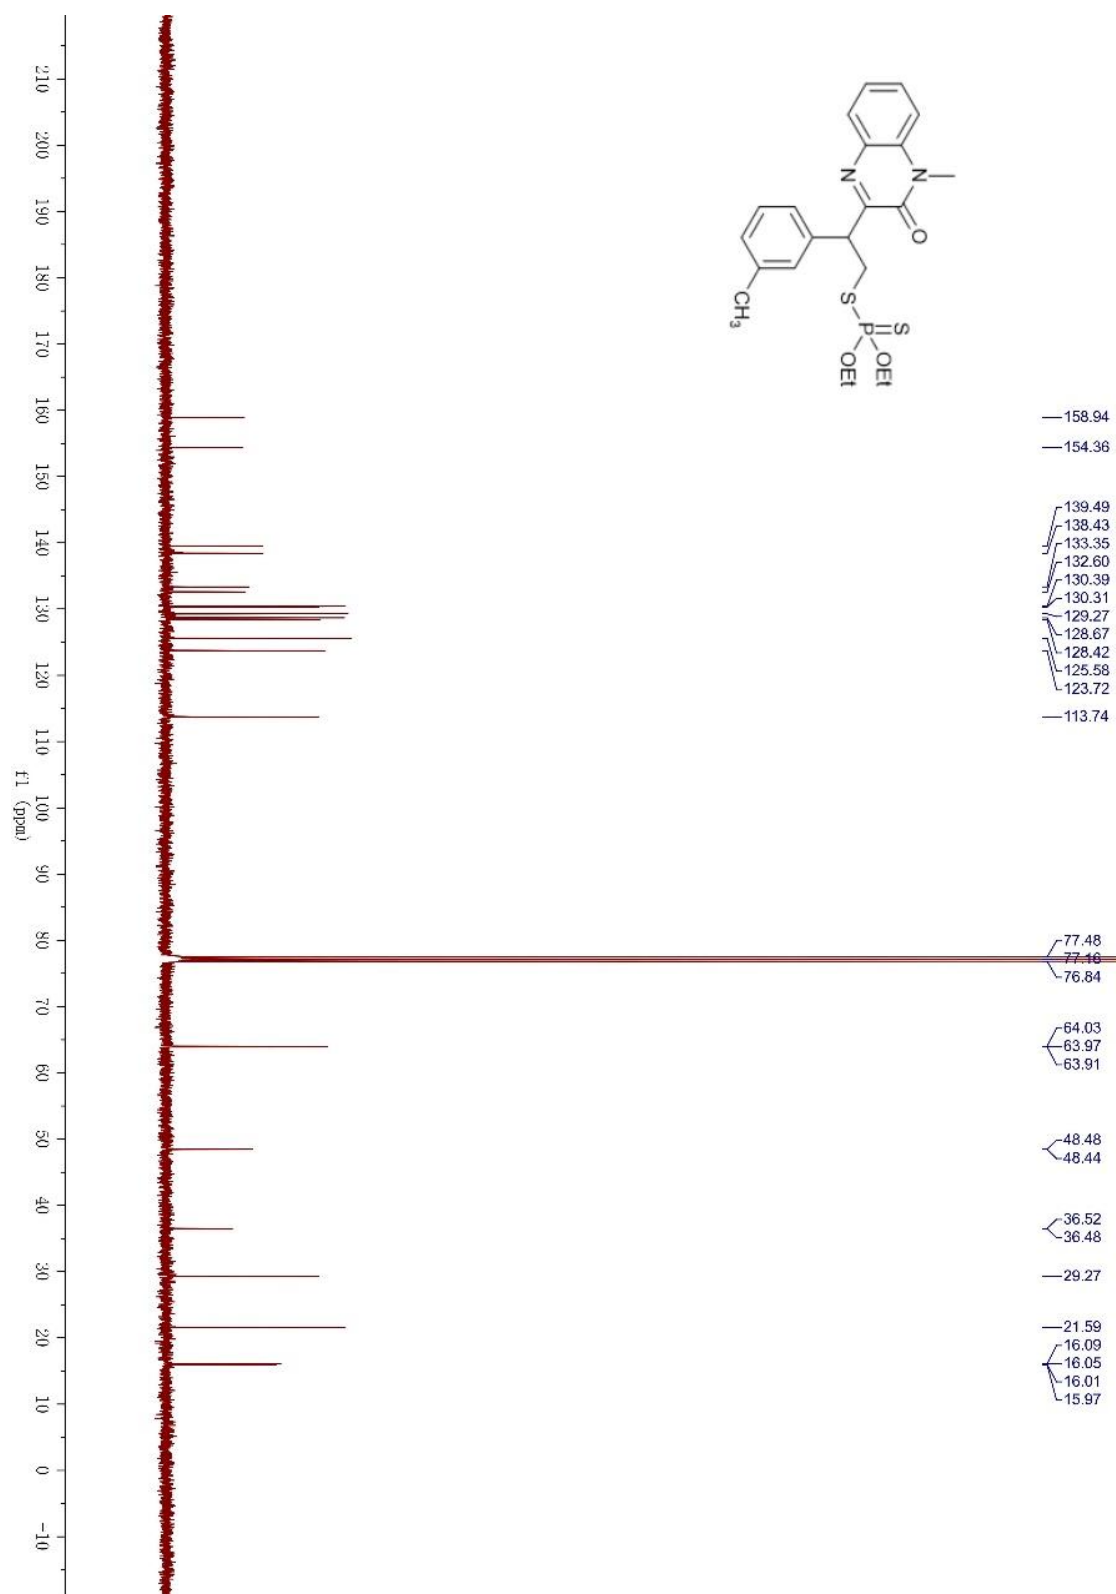

# <sup>1</sup>H NMR of 24

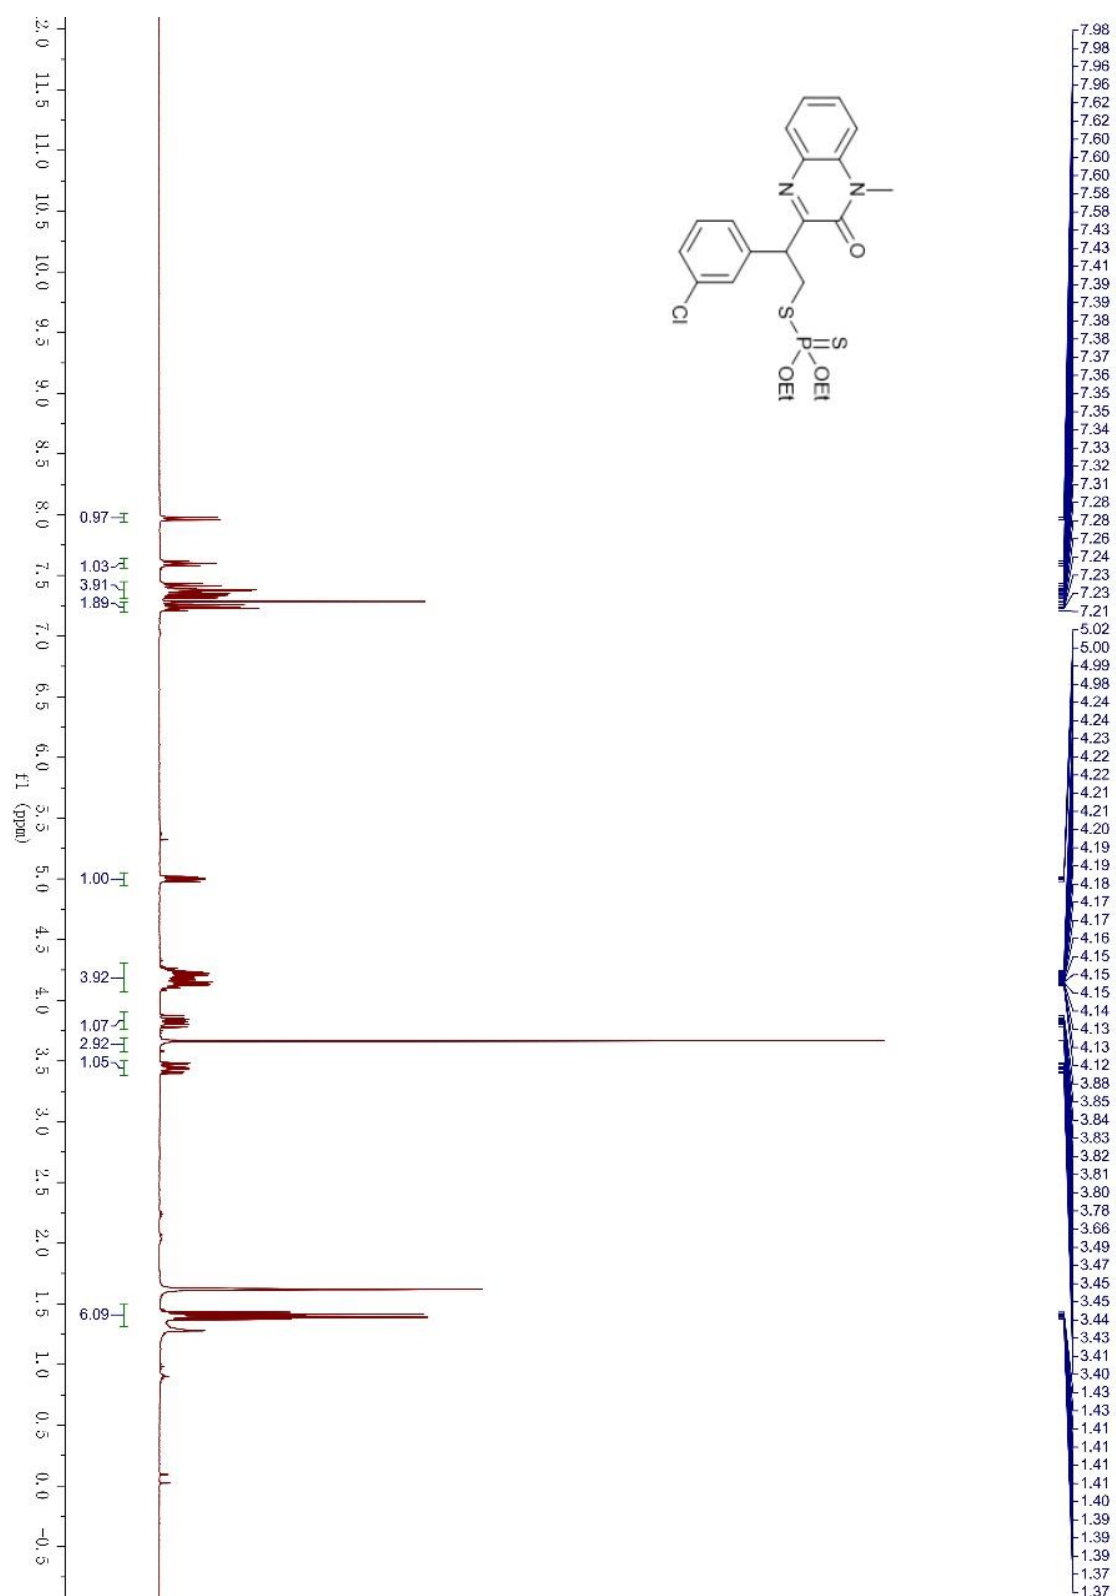

<sup>13</sup>C NMR of 24

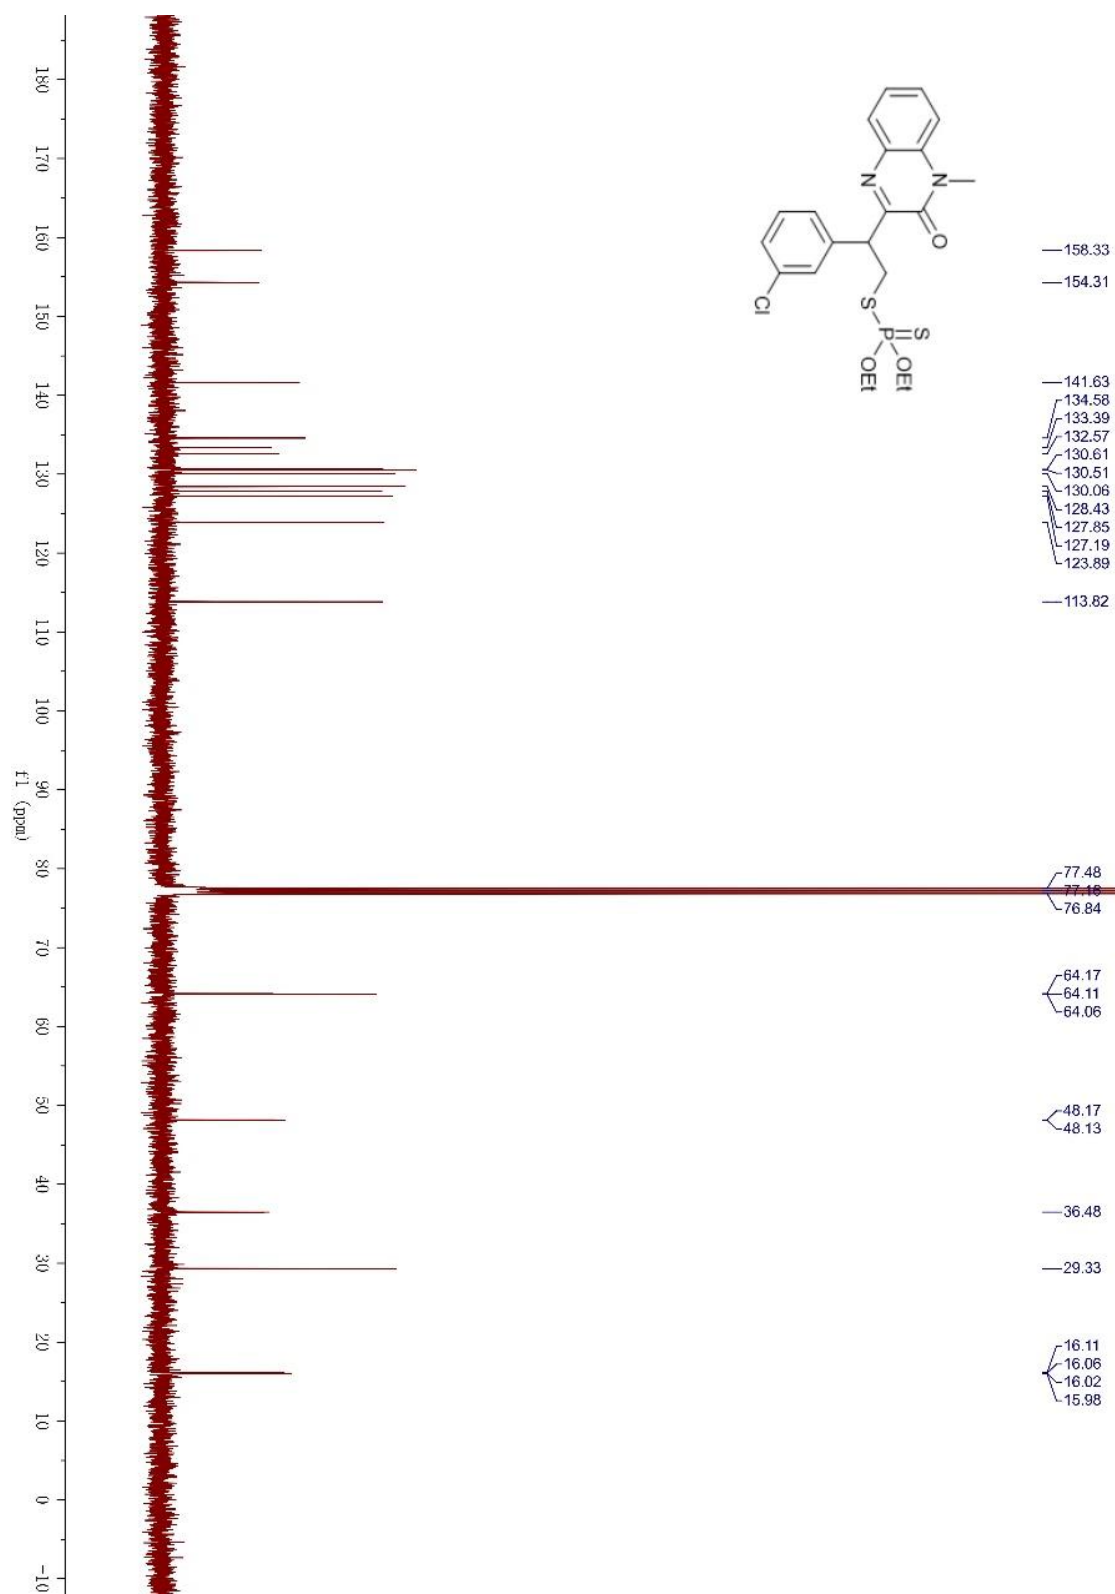

<sup>1</sup>H NMR of 25

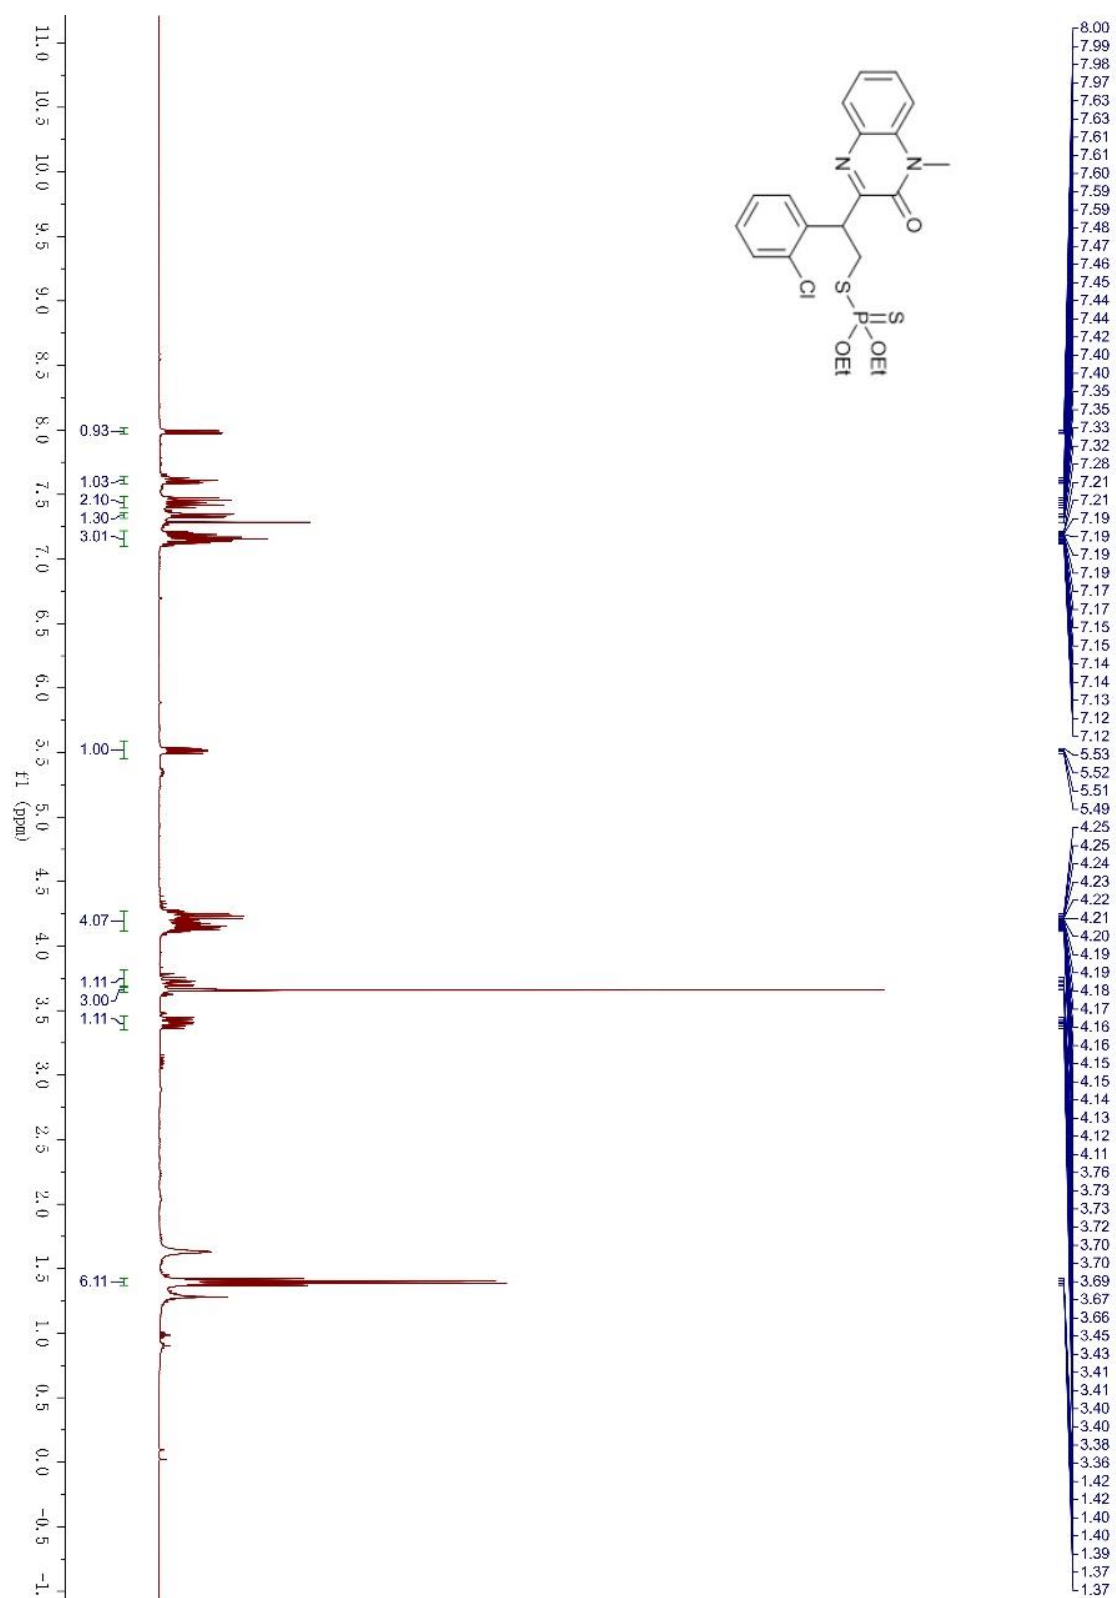

<sup>13</sup>C NMR of 25

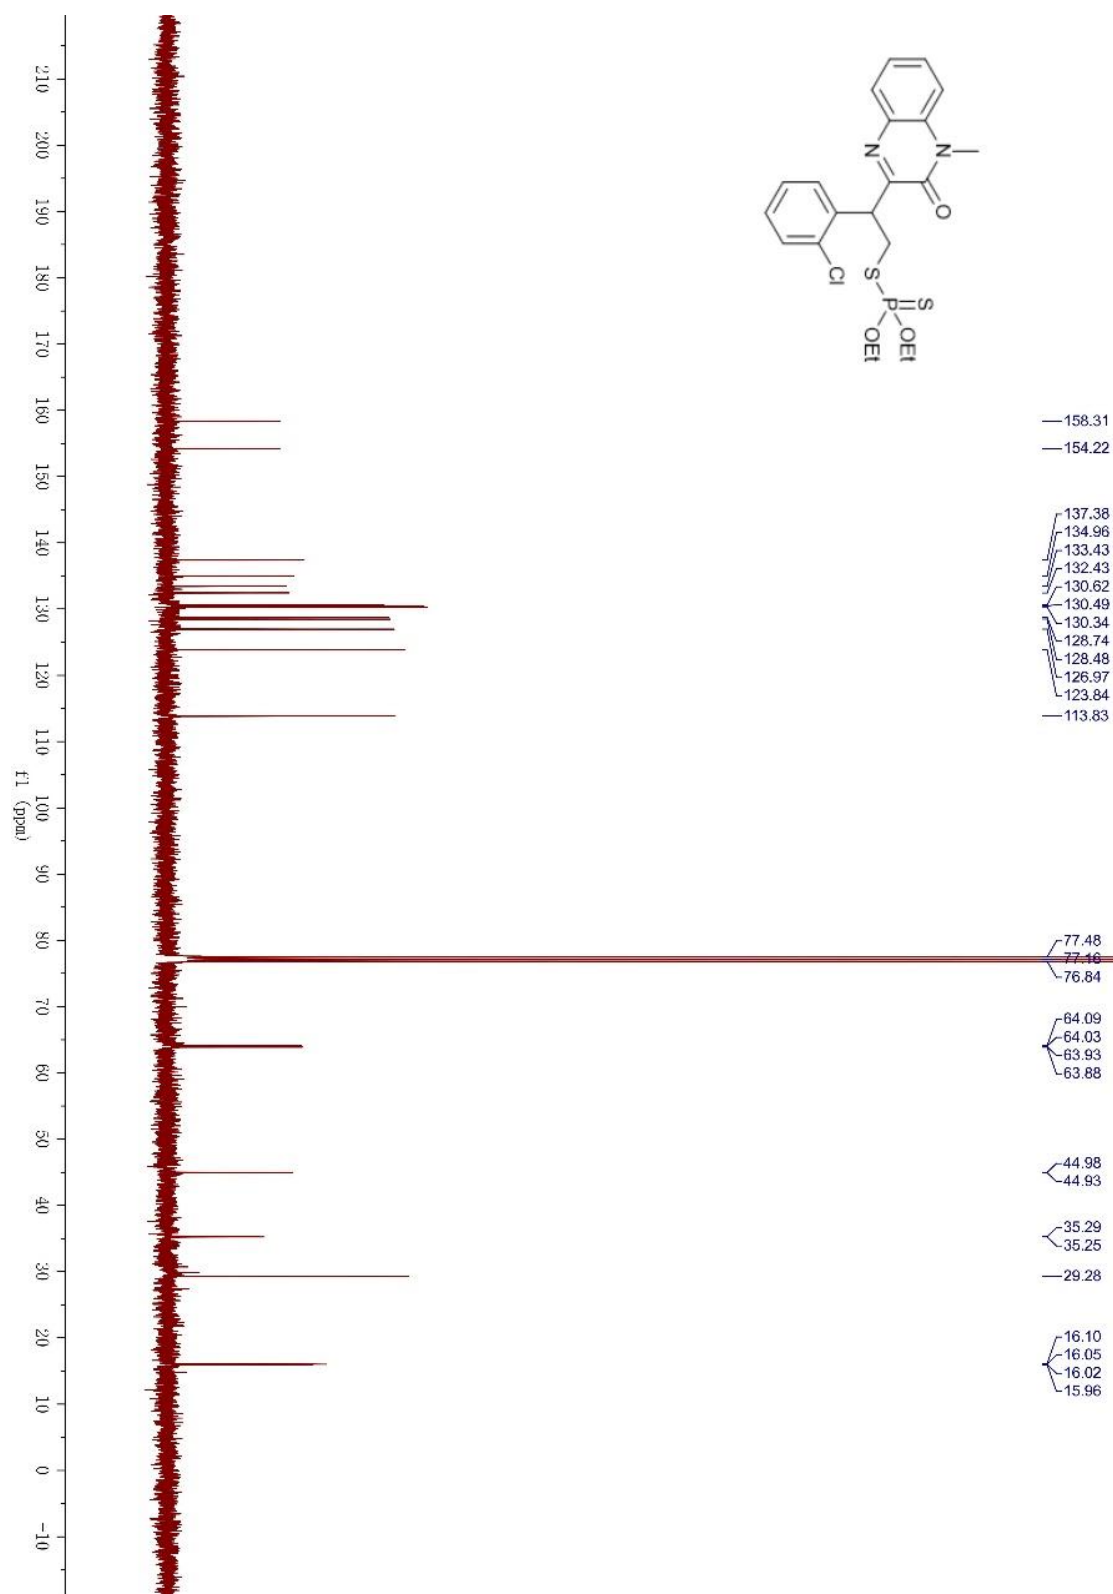

$^1\text{H}$  NMR of 27

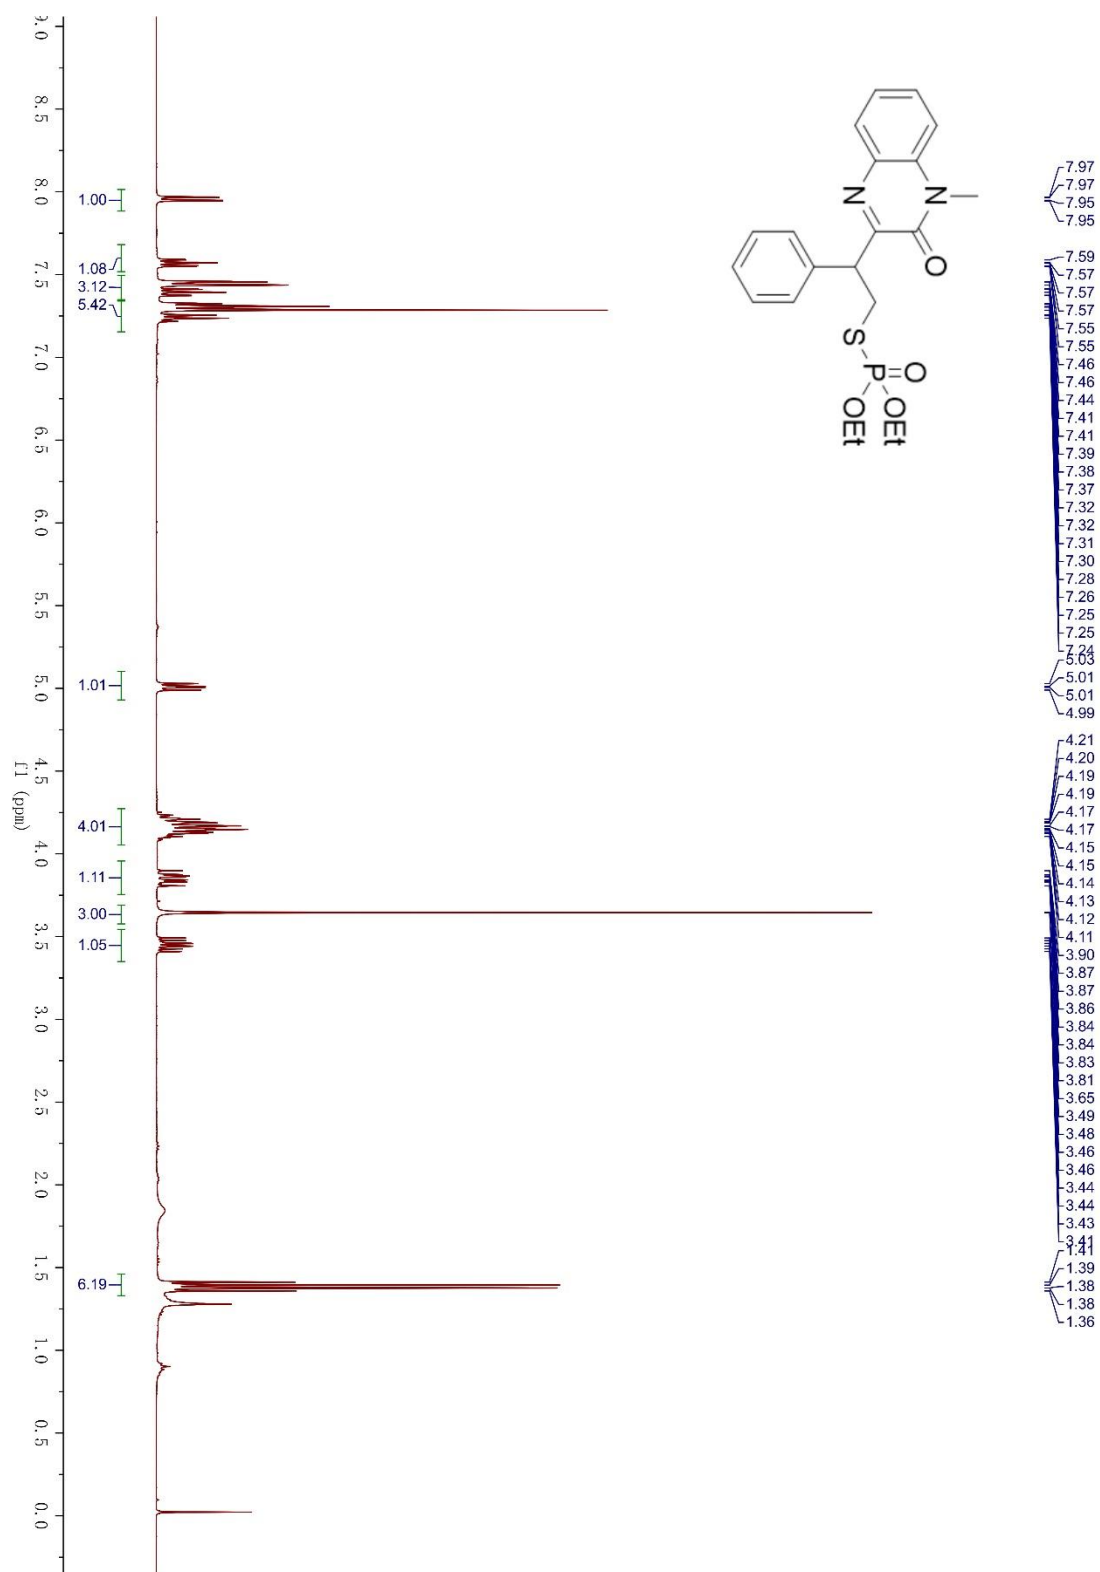

<sup>13</sup>C NMR of 27

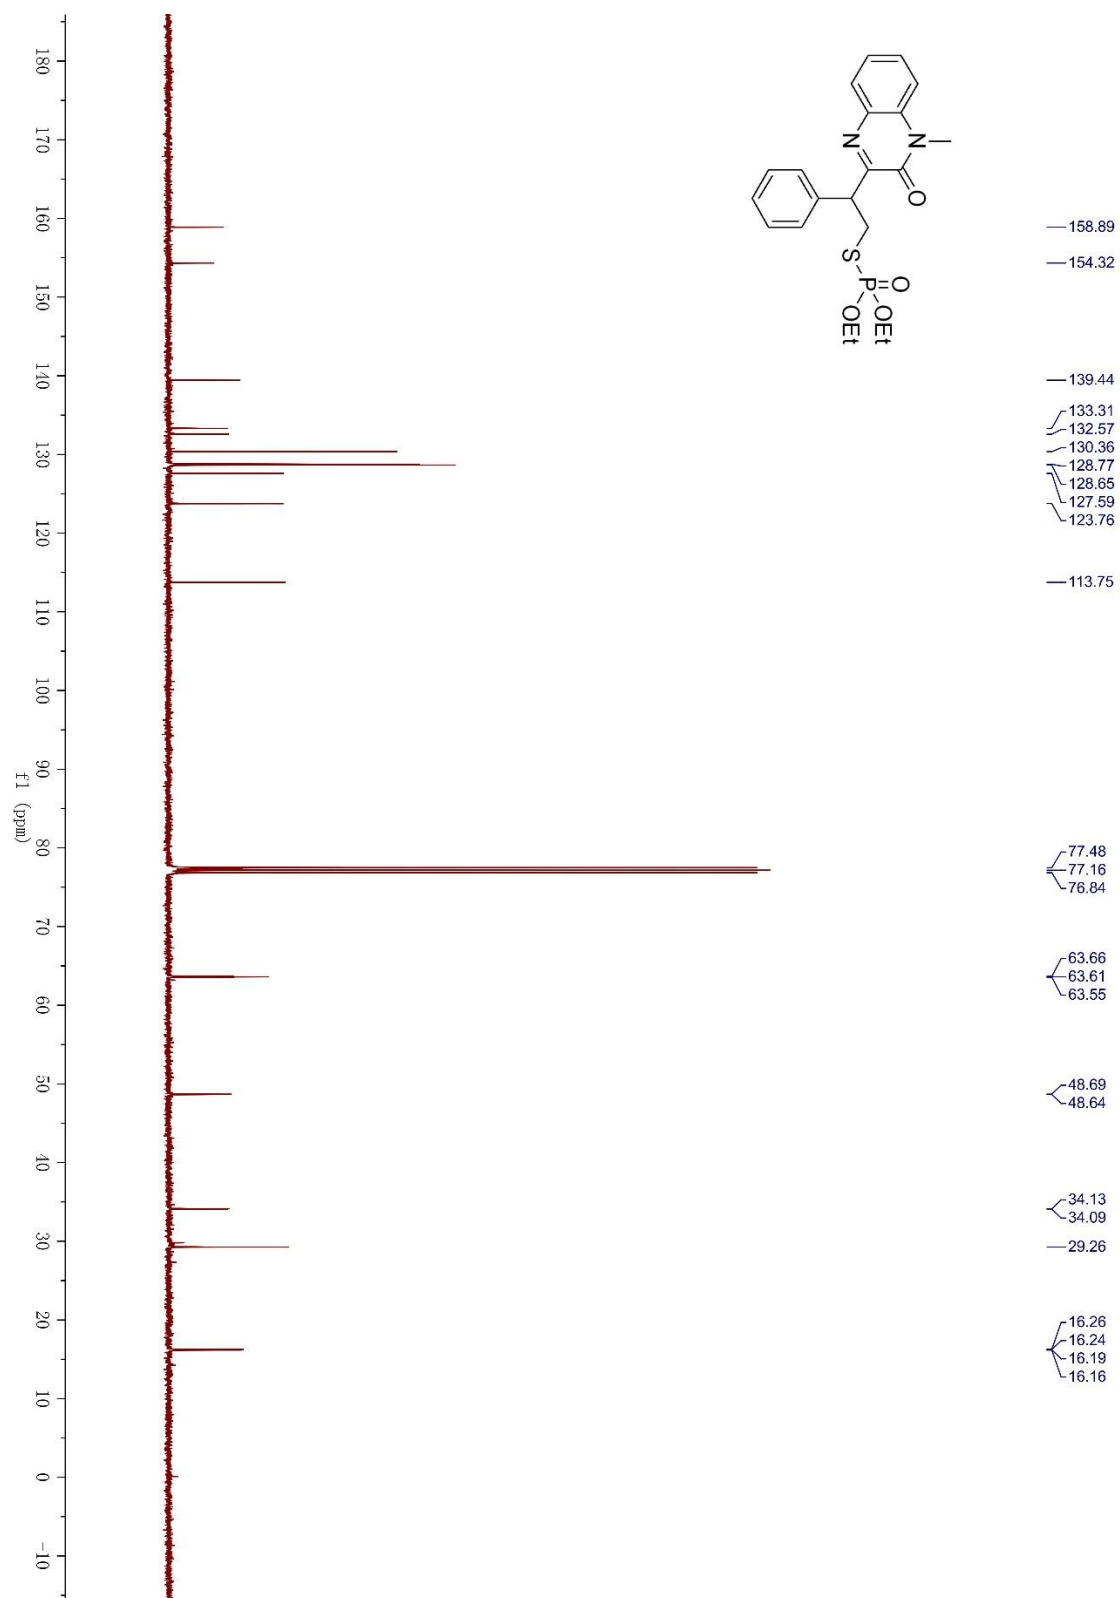

Supplement: d4ob01337a1.pdf [file d4ob01337a1.pdf]
